# Supplementary material for: Immune-Related Gene Expression Profiling After PD-1 Blockade in Non–Small Cell Lung Carcinoma, Head and Neck Squamous Cell Carcinoma, and Melanoma
Source: Oxford University Press journal article supplement (doi:10.1158/0008-5472.can-16-3556), 2017-05-09
Supplement: 00085472can163556-sup-176636_2_unknown_upload_3997093_ddtlnx.xls [file 00085472can163556-sup-176636_2_unknown_upload_3997093_ddtlnx.xls]

## Sheet: raw data
Gene Name	Accession	Class Name	A1	A2	A3	A4	A5	A6	A7	A8	A9	A10	A11	A12	A13	A14	A15	A16	A17	A18	A19	A20	A21	A22	A23	A24	A25	A26	A27	A28	A29	A30	A31	A32	A33	A34	A35	A36	A37	A38	A39	A40	A41	A42	A43	A44	A45	A46	A47
A2M	NM_000014.4	Endogenous	4011	7614	28	9726	2512	7535	11098	15980	8359	4536	12595	5288	1601	4478	1664	9867	14588	11831	8086	26282	6095	8247	9276	4762	11310	2784	115	3644	6395	3502	39126	10859	2400	8960	3472	1241	3164	2725	6057	9355	7370	1959	3387	10722	22478	13565	540
ABCB1	NM_000927.3	Endogenous	43	145	8	303	25	202	107	447	128	73	93	159	44	66	50	120	217	67	120	329	60	234	2984	223	237	129	27	56	49	185	373	106	48	307	136	53	53	72	151	55	166	30	39	93	153	46	1177
ABL1	NM_005157.3	Endogenous	868	1079	36	785	703	912	700	594	512	515	354	200	101	404	284	932	533	1335	786	800	656	540	664	436	772	545	138	1272	949	523	695	849	1115	605	463	354	676	696	685	389	855	280	707	431	1021	793	141
ADA	NM_000022.2	Endogenous	277	427	29	119	105	279	70	138	208	520	87	53	33	60	78	158	119	193	240	75	155	255	106	105	224	270	63	210	243	393	154	189	1064	232	173	255	208	199	321	150	145	55	211	322	286	104	28
ADORA2A	NM_000675.3	Endogenous	44	75	21	46	68	128	99	37	109	59	73	35	16	56	61	90	99	94	135	123	51	78	152	65	64	135	24	102	54	76	64	34	48	81	225	62	43	197	77	64	37	17	55	63	220	32	10
AICDA	NM_020661.1	Endogenous	18	13	9	14	12	37	21	14	38	13	16	5	6	8	9	31	26	22	28	26	14	38	22	28	24	235	13	20	13	19	19	21	22	24	48	12	17	17	32	12	8	6	6	12	19	10	5
AIRE	NM_000383.2	Endogenous	14	21	10	20	20	19	28	19	37	9	18	3	8	12	13	14	26	30	27	25	13	16	23	23	13	126	11	19	16	18	11	18	22	14	84	13	27	20	27	8	13	13	9	12	24	17	10
AKT3	NM_181690.1	Endogenous	1826	939	17	683	1123	1487	616	660	850	882	502	296	146	316	212	1508	985	1115	1192	547	543	814	4363	571	991	581	199	3045	414	958	846	989	1125	1185	730	243	1022	1217	1851	425	3254	4470	1123	2498	2638	1036	62
ALCAM	NM_001627.3	Endogenous	3446	1030	25	455	427	1348	1378	878	845	595	829	764	18	899	843	1175	434	1980	2417	2486	782	2019	633	735	521	7694	108	4771	4635	927	1399	558	5241	7201	812	2086	1795	619	2200	2331	249	528	44	229	315	162	335
AMBP	NM_001633.3	Endogenous	14	14	11	11	68	13	21	973	25	40	12	11	15	14	28	18	17	29	23	4774	13	18269	20	21	16	248	147	14	18	10	87	13	135	17	187	20	17	17	15	6	10	3	5	7	14	8	7
AMICA1	NM_153206.2	Endogenous	285	534	173	546	158	1648	662	177	2136	453	531	270	34	273	133	1054	583	81	705	997	809	636	535	727	391	1013	172	372	236	533	973	192	40	350	2087	58	64	207	290	476	232	152	250	895	748	362	115
ANP32B	NM_006401.2	Endogenous	3532	1772	129	1305	1523	3707	1625	1483	1765	1620	769	462	160	918	680	1549	865	3168	1585	1885	1081	2992	3658	1493	1190	3959	389	9178	3961	1767	1463	2544	8591	3393	1516	1683	1982	4608	3089	1128	1745	1137	1107	1938	1628	2782	608
ANXA1	NM_000700.1	Endogenous	19975	19964	18164	87300	3829	48330	10284	3327	22627	5084	14742	3167	784	8409	595	9241	6702	13022	5910	2737	5152	114735	2414	36520	6426	10171	4461	33992	27842	13568	10747	7064	7899	54654	6585	21068	29562	63579	37538	29177	5118	4145	4473	5025	13545	3664	284
APOE	NM_000041.2	Endogenous	3642	1335	9	1310	4947	7904	5682	2851	10957	5299	5723	475	480	1815	3146	6644	1797	3153	4977	2487	2226	12860	7699	5739	4797	2229	1683	4277	4167	8276	722	1196	1475	3060	4217	337	914	311	4333	3048	3789	6148	46692	11518	10959	17380	7637
APP	NM_000484.3	Endogenous	8279	14099	208	6182	5456	5741	9899	6207	4662	5519	6687	1949	747	5149	1417	6591	5228	7715	8089	7376	3217	8608	10296	4323	5293	3251	1003	7315	10743	4405	7837	7040	8196	4307	3700	9595	8995	6509	8339	7280	6909	2112	7085	2569	12702	4713	1691
ARG1	NM_000045.2	Endogenous	26	30	11	19	8	21	8	10	14	8	20	7	8	2	6	20	7	14	28	12	12	1355	15	8	16	15	17	35	10	15	20	14	33	70	19	19	87	18	143	8	67	8	43	9	13	8	3
ARG2	NM_001172.3	Endogenous	95	130	36	220	42	60	61	194	80	67	46	30	24	46	125	48	31	39	41	185	42	71	194	48	40	42	14	54	153	118	124	39	244	99	63	145	190	115	231	35	20	9	14	177	34	64	9
ATF1	NM_005171.2	Endogenous	618	545	33	327	373	435	404	539	413	486	96	144	53	242	132	386	318	947	443	289	390	735	677	326	366	565	65	672	739	303	398	369	1242	458	277	297	542	657	1094	255	500	147	142	223	263	329	122
ATF2	NM_001256090.1	Endogenous	2063	758	35	556	590	1346	889	854	783	1012	325	308	85	580	344	1015	402	1365	1080	676	524	1008	1320	534	616	1016	193	961	1833	475	807	616	1770	868	537	549	614	644	1685	746	991	490	569	644	887	872	242
ATG10	NM_001131028.1	Endogenous	146	207	20	131	70	232	233	110	93	115	71	74	23	143	61	171	63	297	286	171	132	285	370	137	141	150	71	153	341	145	116	108	376	163	181	165	99	148	312	184	72	93	102	116	152	270	68
ATG12	NM_004707.2	Endogenous	96	104	12	62	69	94	45	71	57	115	55	13	16	55	26	71	44	95	110	43	45	136	79	86	55	71	12	93	89	42	66	49	93	172	66	41	139	69	131	38	75	23	80	41	53	50	24
ATG16L1	NM_198890.2	Endogenous	361	430	32	305	303	830	529	446	439	579	341	178	42	606	249	373	297	775	919	370	742	809	526	744	287	617	81	835	1172	343	376	327	606	577	534	499	447	426	463	387	348	233	325	330	399	366	77
ATG5	NM_004849.2	Endogenous	841	676	74	483	614	917	604	693	462	391	308	214	70	443	196	604	287	932	797	330	599	1037	857	331	387	892	109	1156	1043	490	596	434	1637	861	350	441	651	856	1708	614	346	147	278	303	473	338	104
ATG7	NM_001136031.2	Endogenous	397	422	66	502	473	828	629	582	733	467	456	215	51	304	242	664	322	681	1097	549	808	1189	720	695	541	461	108	777	733	442	679	455	614	591	605	557	406	542	551	478	760	436	236	548	689	477	112
ATM	NM_000051.3	Endogenous	48	37	6	30	28	47	32	22	33	35	19	15	2	24	22	41	21	39	39	50	15	42	84	39	15	50	8	51	45	28	30	29	55	40	45	42	40	29	44	22	12	14	17	26	21	26	9
AXL	NM_021913.2	Endogenous	689	1100	36	679	1306	1426	757	766	1144	616	1078	259	112	600	192	2057	750	2011	762	396	885	2514	588	677	1108	368	61	397	589	444	541	990	342	545	1125	175	307	364	755	418	303	123	161	223	815	464	32
BAGE	NM_001187.1	Endogenous	19	22	29	35	14	35	17	17	18	19	30	7	12	8	21	37	27	19	27	72	26	24	87	25	23	18	12	26	17	15	33	21	22	42	28	26	24	23	39	22	16	7	13	8	10	19	22
BATF	NM_006399.3	Endogenous	45	114	29	62	72	247	243	143	78	159	172	40	6	75	89	120	82	69	294	39	113	174	99	240	90	515	17	93	47	147	110	26	38	85	217	38	37	40	54	63	83	9	21	112	90	117	33
BAX	NM_138761.3	Endogenous	1232	1010	93	731	1233	1482	692	991	1458	828	754	308	73	632	595	1150	613	1929	1623	1089	1187	1645	1516	1084	910	1161	227	2196	2950	680	804	1031	2486	1676	1168	1454	1545	1701	1839	827	1390	1249	1056	2309	1399	1402	595
BCL10	NM_003921.2	Endogenous	1227	911	384	1295	786	1662	1663	1205	1419	835	1490	287	92	872	403	1081	1277	3649	1888	930	1106	2705	1378	2052	892	1405	138	1490	1876	790	979	937	1551	1049	762	1850	1589	2505	1652	860	1115	565	571	1293	949	679	233
BCL2	NM_000657.2	Endogenous	258	221	23	451	216	388	338	208	515	154	292	213	69	86	460	317	218	191	458	344	137	180	435	372	345	481	16	859	240	664	451	536	466	562	691	325	496	222	376	140	1114	699	659	611	1435	732	293
BCL2L1	NM_001191.2	Endogenous	1610	1644	249	1085	2312	2819	2781	1681	2100	1082	2887	672	154	1361	730	1479	1410	3240	2924	1539	1239	3503	2987	1937	846	2015	719	1220	2438	746	1530	1186	2818	1569	1009	1996	1243	5287	2840	1385	875	631	495	2125	1241	832	785
BCL6	NM_001706.2	Endogenous	1991	1055	158	720	606	492	412	791	435	678	512	518	202	416	325	747	598	933	1367	1007	476	1012	541	704	1016	726	58	1362	1725	751	1255	473	1392	1038	515	1042	1505	928	1888	571	193	135	84	280	646	295	121
BID	NM_001196.2	Endogenous	61	80	6	31	26	56	70	19	71	30	29	9	8	34	13	60	28	86	30	44	64	132	74	26	24	107	13	75	52	60	36	42	152	66	53	86	50	285	67	42	47	23	29	50	56	33	14
BIRC5	NM_001168.2	Endogenous	713	515	63	114	423	1385	841	394	125	498	271	49	28	438	501	153	156	1289	1128	373	426	1111	2091	163	110	788	248	2306	2624	1334	202	812	4731	584	190	715	990	1527	2145	308	1029	231	426	515	256	905	275
BLK	NM_001715.2	Endogenous	9	33	17	61	9	142	21	35	148	11	21	13	7	12	12	45	42	14	126	18	22	19	37	20	10	277	10	18	8	22	30	17	10	30	156	21	18	20	6	19	3	35	7	6	105	11	6
BLNK	NM_013314.2	Endogenous	76	146	45	186	120	196	101	127	257	92	46	37	11	73	50	131	73	68	135	114	55	128	74	176	64	490	36	64	155	185	89	39	61	98	183	124	50	203	79	124	32	33	35	76	179	52	13
BMI1	NM_005180.5	Endogenous	620	516	104	745	542	484	468	517	601	419	325	257	85	337	259	707	444	1048	719	309	563	2970	1383	339	365	448	119	608	1587	353	561	540	1320	474	360	736	434	533	1695	523	465	410	785	514	516	822	269
BST1	NM_004334.2	Endogenous	268	265	29	179	335	496	228	421	596	361	212	68	60	132	87	932	288	462	984	153	304	279	159	147	256	223	63	156	184	159	247	424	246	173	325	35	40	78	232	199	477	484	75	195	190	143	71
BST2	NM_004335.2	Endogenous	283	1092	191	252	2589	1917	3127	1074	1634	2321	646	294	60	417	203	996	375	1832	578	529	847	4344	1747	664	780	2091	96	439	1898	609	520	1788	435	529	2678	122	573	2338	1159	870	1120	229	283	1223	2352	2151	189
BTK	NM_000061.1	Endogenous	71	104	12	100	104	264	118	58	383	124	109	37	9	62	57	237	95	118	182	100	97	165	97	91	108	432	41	78	68	113	157	66	35	64	263	33	36	44	100	131	176	57	58	163	235	107	163
BTLA	NM_181780.2	Endogenous	31	61	16	65	34	217	48	30	265	74	61	27	6	36	20	105	67	31	189	76	34	61	84	66	36	571	28	65	47	121	51	31	54	69	296	17	30	28	62	94	25	113	11	84	166	101	27
C1QA	NM_015991.2	Endogenous	823	1192	24	389	1183	4262	1114	487	3272	1366	2481	374	115	614	354	2230	175	1011	516	909	2141	4308	1738	3025	1126	736	107	946	639	1481	1106	746	402	395	1608	110	196	344	2926	840	591	334	585	4380	2839	1574	217
C1QB	NM_000491.3	Endogenous	2297	3421	142	1298	3299	13537	2646	1488	11074	4777	6746	1251	304	1935	847	6903	492	3025	1848	2476	6371	14050	4792	5144	3544	1994	373	2983	1967	4292	2908	2385	1448	1214	4012	267	456	978	9894	3031	1472	889	1379	9138	6627	3720	631
C1QBP	NM_001212.3	Endogenous	2269	2424	198	1638	1120	2557	851	1705	1437	2466	947	426	155	678	690	990	852	2446	1261	1555	2717	4075	2261	605	1009	1867	455	5809	5890	1365	1550	2565	10040	1321	1091	2234	2714	6183	3333	1134	1311	1168	1886	2858	1769	2716	834
C1R	NM_001733.4	Endogenous	3770	11005	395	5713	13956	5369	3310	5372	3682	14138	2516	923	952	3449	1830	14520	6312	6403	2223	2832	2281	17257	3859	5053	6481	1653	75	3881	7029	5973	8137	6521	2627	3594	2476	5688	2014	2332	3920	5705	2270	720	705	1614	4780	1848	250
C1S	NM_001734.2	Endogenous	2069	5676	124	3196	6963	3326	1472	2319	1993	9894	749	542	481	1758	624	6150	2522	3585	1308	1215	778	7149	1287	1352	3091	1155	44	1548	3808	3447	4344	2680	1086	1503	1005	995	395	1785	1486	2774	811	517	348	1072	1876	814	122
C2	NM_000063.3	Endogenous	416	405	28	226	1217	1196	376	2276	1289	1593	593	151	32	322	254	1303	387	517	890	5356	570	1809	1098	595	708	300	63	706	355	531	476	370	358	296	854	106	118	188	818	681	403	88	159	1080	620	542	49
C3	NM_000064.2	Endogenous	443	2306	15	4903	1835	1050	933	2604	2637	2628	725	507	556	688	126	15736	1315	445	1030	2157	497	19835	701	2252	4130	1117	85	1128	1572	1323	2834	681	350	2079	1762	280	100	265	1013	2856	508	185	104	355	3202	630	19
C3AR1	NM_004054.2	Endogenous	345	298	28	299	545	714	313	240	920	470	303	85	34	244	108	645	93	399	249	247	357	878	371	569	398	228	92	238	208	191	290	206	178	131	298	42	98	96	912	245	207	116	131	480	310	265	66
C4B	NM_001002029.3	Endogenous	209	1066	11	2134	394	738	2530	1137	1141	10609	881	207	215	364	994	1795	1825	680	4587	8116	455	9775	2309	1660	2308	705	21	1995	771	820	2661	895	310	1994	637	1351	1256	170	961	462	111	165	215	362	1715	564	48
C4BPA	NM_000715.3	Endogenous	10	24	5	10	34	9	490	5349	280	11	807	4	9	36	118	189	819	50	304	5094	15	3017	136	24	1962	55	12	128	371	14	16	11	41	15	5112	7	13	8	15	740	8	7	6	9	344	6	3
C5	NM_001735.2	Endogenous	107	64	14	74	780	137	80	670	107	75	40	49	24	58	174	122	108	144	141	1958	89	1024	89	77	64	132	16	199	145	59	114	94	220	109	220	66	88	85	85	59	85	63	43	49	178	94	26
C6	NM_000065.2	Endogenous	25	31	12	164	23	47	58	106	66	16	25	42	67	23	31	53	30	48	50	270	24	1789	36	44	195	39	25	23	21	40	350	42	47	143	40	21	44	40	49	10	23	23	6	16	84	24	13
C7	NM_000587.2	Endogenous	106	244	8	2946	26	1352	761	453	4516	146	685	113	416	27	104	4168	1982	113	1118	1092	134	872	708	26	8615	1062	6	260	296	569	1100	56	34	560	1992	29	26	25	1122	609	37	418	364	75	8950	56	89
C8A	NM_000562.2	Endogenous	12	11	11	11	12	20	12	12	11	12	11	9	4	4	7	14	8	22	12	16	14	1160	11	14	12	9	10	8	7	5	11	12	33	11	23	13	14	9	26	5	8	5	4	9	16	8	5
C8B	NM_000066.2	Endogenous	26	30	11	21	16	36	25	61	45	30	36	9	12	24	12	45	25	41	71	39	22	1385	29	69	38	20	13	25	41	24	29	24	70	37	28	22	27	33	41	16	15	4	9	14	38	14	7
C8G	NM_000606.2	Endogenous	62	30	17	34	63	48	40	31	15	40	18	18	22	15	34	30	24	29	57	49	32	873	32	55	37	85	15	34	23	38	41	40	59	36	67	59	135	132	81	11	35	16	32	36	33	31	10
C9	NM_001737.3	Endogenous	26	24	10	21	34	35	21	18	42	36	26	10	9	12	12	50	12	26	45	26	22	5474	24	35	21	31	41	17	14	23	22	14	36	17	82	10	21	19	48	20	11	10	5	25	32	20	6
CAMP	NM_004345.3	Endogenous	34	40	11	55	40	85	44	30	49	16	29	11	14	14	15	48	38	34	98	47	29	50	35	42	37	41	3	34	29	17	27	37	43	37	39	20	25	35	51	20	18	10	15	25	29	20	11
CARD11	NM_032415.2	Endogenous	821	162	29	166	203	962	626	489	444	177	132	113	12	404	147	239	787	169	797	467	379	288	135	278	256	1183	57	1185	1163	250	196	193	80	188	716	43	108	236	501	117	39	92	41	158	304	104	23
CARD9	NM_052813.4	Endogenous	70	49	16	51	67	157	96	92	145	164	82	18	6	78	45	226	135	115	135	131	117	257	138	259	108	273	16	123	66	67	70	53	83	89	377	33	90	105	124	53	55	30	31	112	155	65	20
CASP1	NM_001223.3	Endogenous	311	429	92	274	421	424	256	134	546	362	326	141	27	180	69	578	224	281	281	217	132	605	209	221	217	497	132	310	508	343	432	217	441	284	436	370	182	738	394	522	1842	98	121	239	331	394	793
CASP10	NM_032977.3	Endogenous	34	21	8	14	30	78	26	32	102	20	26	15	4	11	4	66	17	73	28	25	40	71	29	36	25	16	3	16	18	17	36	19	32	16	31	13	13	23	35	29	22	12	15	23	37	13	6
CASP3	NM_032991.2	Endogenous	421	486	43	260	214	633	381	376	448	701	167	156	51	318	133	552	353	759	635	473	279	595	689	261	397	944	87	919	1160	371	367	351	2711	671	408	540	489	689	876	293	1095	207	275	264	390	274	153
CASP8	NM_001228.4	Endogenous	1040	721	71	501	484	1539	905	952	1212	669	676	366	30	1080	187	1007	713	983	1610	695	698	888	700	1701	547	1739	150	686	1607	650	808	522	993	799	1378	646	525	489	709	503	695	392	312	550	864	585	128
CCL1	NM_002981.1	Endogenous	9	20	13	16	16	18	16	12	15	8	10	7	6	4	8	14	11	16	17	13	13	18	18	14	8	10	7	10	14	11	11	10	13	20	10	22	11	40	22	10	3	8	4	14	9	4	4
CCL11	NM_002986.2	Endogenous	58	240	12	21	47	42	304	88	42	69	59	51	7	156	25	114	135	125	50	24	70	94	56	462	87	16	3	103	107	132	612	1341	235	174	17	71	36	131	30	141	12	6	232	19	65	26	9
CCL13	NM_005408.2	Endogenous	311	294	13	70	525	610	663	35	254	310	119	30	18	524	22	767	49	370	180	564	1064	2330	135	392	543	60	10	318	100	96	688	141	170	192	381	24	62	141	813	254	61	23	120	217	110	112	7
CCL14	NM_032963.3	Endogenous	83	465	45	840	98	127	290	544	706	47	195	474	352	22	38	372	442	222	303	369	57	376	121	107	1633	313	10	97	47	154	2400	518	54	911	253	91	65	101	98	156	319	83	262	57	476	119	44
CCL15	NM_032965.3	Endogenous	12	15	20	11	577	27	13	77	11	10	15	26	10	10	15	19	21	27	25	24	19	68	29	26	18	91	9	17	24	14	26	19	44	23	24	10	25	12	16	14	2	4	112	10	18	10	5
CCL16	NM_004590.2	Endogenous	14	17	7	14	15	23	31	43	15	15	9	14	13	9	11	26	19	25	49	23	14	348	18	17	44	18	6	17	15	9	63	21	23	48	33	17	15	15	29	7	13	9	11	7	17	11	9
CCL17	NM_002987.2	Endogenous	35	64	18	34	11	679	283	20	303	16	25	38	6	29	16	200	45	29	80	72	65	47	40	196	50	117	7	86	57	34	51	32	17	83	851	47	44	33	44	31	10	24	35	99	60	86	13
CCL18	NM_002988.2	Endogenous	1133	3215	17	248	352	4743	1392	229	4076	866	993	114	112	1923	213	1214	182	1035	1357	1893	1258	990	489	1532	5604	361	46	1265	796	805	1994	587	733	1270	585	25	158	296	4389	11853	176	78	790	1617	1253	219	91
CCL19	NM_006274.2	Endogenous	212	1041	17	1509	135	287	822	220	5744	118	905	580	163	201	208	1294	530	90	1636	214	121	577	609	199	1013	3872	38	552	327	5562	1819	923	24	4135	4587	304	76	144	73	1074	330	1054	183	1619	3409	415	94
CCL2	NM_002982.3	Endogenous	974	1751	41	3211	6754	1134	3452	724	721	2211	4543	388	86	1341	486	2180	667	1930	459	713	866	4651	3402	1645	2579	551	1065	836	920	1525	2888	2386	2539	1158	1401	218	246	581	1700	1350	218	141	504	1031	1404	504	267
CCL20	NM_004591.1	Endogenous	110	749	103	189	2313	137	572	3822	316	105	1854	13	38	7522	394	512	93	98	362	305	99	82	417	741	127	312	17	256	171	2106	74	96	44	65	220	1860	75	917	587	5582	44	21	34	28	68	22	14
CCL21	NM_002989.2	Endogenous	52	211	11	423	36	412	344	205	7898	166	980	122	88	190	335	635	839	41	1162	991	185	408	2236	200	342	6426	6	476	245	267	3011	368	772	1838	5045	349	293	52	18	904	194	1459	225	189	1235	131	229
CCL22	NM_002990.3	Endogenous	54	91	27	33	15	311	221	16	606	15	27	13	12	96	11	431	61	84	104	49	44	71	64	791	115	199	19	46	63	60	37	39	19	135	640	103	32	19	90	116	15	7	19	45	42	14	7
CCL23	NM_145898.1	Endogenous	13	38	3	44	22	47	29	11	89	24	32	16	13	21	16	134	29	25	25	29	66	48	22	51	55	18	7	20	16	12	59	28	20	29	30	9	11	11	53	32	3	3	200	21	20	31	2
CCL24	NM_002991.2	Endogenous	24	3	1	10	6	3	6	5	107	3	13	1	2	3	6	1	3	7	13	5	25	13	124	70	13	9	3	23	22	40	35	47	6	4	3	5	11	6	16	3	6	5	26	7	5	3	10
CCL25	NM_005624.2	Endogenous	12	10	12	22	18	25	18	12	21	15	11	6	13	14	14	21	15	24	18	22	21	16	19	19	20	21	1	23	18	13	7	16	19	12	20	12	8	17	23	10	7	7	8	5	15	5	8
CCL26	NM_006072.4	Endogenous	287	32	9	18	82	79	27	33	56	45	22	11	6	26	50	35	42	47	41	21	40	60	38	40	51	32	7	284	268	44	38	357	99	392	49	108	222	59	188	63	10	7	9	16	4	22	11
CCL27	NM_006664.2	Endogenous	15	10	5	12	24	19	36	15	19	15	8	6	7	13	14	47	17	25	49	52	20	30	15	22	15	21	10	25	32	24	18	23	25	19	20	12	21	34	21	20	79	3	5	10	15	7	6
CCL28	NM_148672.2	Endogenous	10	104	5	692	15	16	20	16	199	12	10	74	4	9	7	51	14	20	13	13	32	47	19	173	18	111	3	21	40	66	72	26	15	166	21	48	36	19	22	10	4	4	37	9	8	7	7
CCL3	NM_002983.2	Endogenous	205	147	73	333	1114	615	255	92	437	271	258	40	38	152	100	249	63	185	263	156	137	243	508	534	389	86	104	214	185	129	73	481	262	309	204	40	97	130	1316	99	305	44	100	486	217	263	73
CCL3L1	NM_021006.4	Endogenous	272	157	55	645	1432	975	274	132	507	317	283	46	45	160	105	399	55	253	395	204	122	258	402	242	416	87	96	161	249	169	70	496	313	225	261	21	47	101	1744	136	303	45	98	586	194	273	70
CCL4	NM_002984.2	Endogenous	216	217	142	729	1031	1238	234	92	686	521	456	75	44	218	107	419	197	166	454	151	141	266	594	314	380	141	163	288	417	295	134	259	258	184	232	37	79	122	1315	238	46	35	66	516	222	307	58
CCL5	NM_002985.2	Endogenous	148	355	61	334	3714	1560	1052	155	833	1081	708	406	36	289	403	604	584	76	471	622	211	173	1193	580	297	684	303	521	533	1492	489	210	217	243	537	297	93	200	397	399	250	83	106	1998	918	775	62
CCL7	NM_006273.2	Endogenous	15	31	13	13	595	19	32	11	8	47	19	4	5	18	12	21	21	20	29	14	15	40	46	18	18	21	46	18	23	8	18	22	27	13	16	12	17	12	23	12	3	7	5	12	18	7	2
CCL8	NM_005623.2	Endogenous	87	45	15	111	2867	234	145	39	65	555	59	116	19	175	38	116	34	126	40	60	79	310	325	116	153	29	408	50	80	115	97	210	313	67	77	20	60	70	211	76	20	10	44	190	59	94	14
CCND3	NM_001760.2	Endogenous	680	384	50	259	225	1203	512	439	702	205	321	140	37	221	264	460	496	1569	791	841	420	1417	424	557	327	866	76	676	1266	214	427	651	565	466	942	231	383	844	1385	194	644	285	286	394	1064	627	152
CCR1	NM_001295.2	Endogenous	130	156	64	114	351	200	130	140	482	258	176	83	22	152	72	204	60	185	71	94	128	346	175	177	172	242	186	99	114	93	161	97	114	83	138	36	39	63	249	194	115	51	45	232	150	128	62
CCR2	NM_001123041.2	Endogenous	48	96	15	56	57	232	102	38	200	108	27	56	10	53	24	148	126	53	56	91	130	122	124	43	74	152	95	68	52	52	183	33	31	102	247	24	17	52	57	184	27	34	41	147	102	72	14
CCR3	NM_001837.2	Endogenous	15	25	21	25	14	20	27	12	40	21	25	5	2	22	15	23	21	24	43	20	18	60	39	18	17	18	15	18	62	18	31	32	11	16	20	24	12	16	24	23	3	12	9	7	14	10	9
CCR4	NM_005508.4	Endogenous	31	66	11	35	38	124	60	23	110	49	68	16	13	27	36	46	43	34	74	28	20	45	82	60	45	77	7	38	29	59	34	29	36	37	105	20	16	26	55	45	30	16	21	42	59	19	12
CCR5	NM_000579.1	Endogenous	54	79	17	64	136	230	185	28	207	121	81	102	2	75	46	80	40	28	44	80	59	121	111	61	69	183	97	53	35	184	85	33	43	66	161	18	17	28	103	111	26	20	18	233	104	71	11
CCR6	NM_031409.2	Endogenous	31	78	23	83	28	109	71	28	158	28	39	18	11	47	19	134	41	25	78	91	38	79	49	81	57	363	16	44	13	47	57	34	30	38	291	23	20	39	36	54	12	25	17	28	85	22	10
CCR7	NM_001838.2	Endogenous	24	41	4	63	9	89	47	15	129	27	113	7	6	33	22	47	17	11	76	19	8	27	18	15	32	233	14	29	26	83	22	8	13	21	314	4	5	15	21	28	14	52	14	45	104	31	10
CCR9	NM_031200.1	Endogenous	5	12	7	13	18	23	7	5	9	6	2	4	6	8	7	15	8	11	10	10	13	18	7	9	10	6	1	14	11	8	9	10	15	10	16	11	13	33	26	11	5	7	4	2	13	4	5
CCRL2	NM_003965.4	Endogenous	78	105	35	97	93	238	130	74	471	112	148	34	25	89	66	147	78	130	128	179	129	150	113	254	132	140	59	95	148	109	70	80	67	122	204	33	28	57	106	124	39	29	34	161	130	64	31
CD14	NM_000591.2	Endogenous	996	1595	127	882	988	1196	935	1207	1542	1041	1456	139	100	630	339	1913	496	1598	795	774	1344	4245	1246	1226	1355	640	157	1411	898	885	1733	1127	405	526	1061	174	302	555	2854	982	506	281	686	2030	1527	920	114
CD160	NM_007053.2	Endogenous	14	11	5	18	10	21	26	9	27	9	10	94	3	13	11	21	11	15	18	23	8	19	12	18	12	36	3	16	17	16	27	17	9	10	33	13	7	17	16	9	11	4	3	13	36	8	12
CD163	NM_004244.4	Endogenous	1348	2647	23	570	1174	4783	848	575	2394	1167	2213	192	138	687	319	1638	283	1340	1279	682	2774	4109	790	565	1327	254	564	846	561	629	1412	584	465	278	737	77	153	362	5616	1777	326	206	365	1741	1109	1015	136
CD164	NM_006016.4	Endogenous	2364	2782	118	1777	2650	3195	2671	3237	2472	1497	866	1051	239	1556	555	3630	971	3959	1953	1373	1981	3997	2844	1817	1608	3590	326	3114	2891	1708	2922	1669	4031	3290	1704	1224	2338	2929	3657	1981	2260	398	1390	2113	1917	1424	370
CD180	NM_005582.2	Endogenous	90	121	4	118	25	320	126	58	425	174	98	30	10	102	92	404	73	112	139	153	138	214	142	118	108	651	31	141	89	126	118	81	72	111	362	73	48	59	158	197	41	75	57	78	224	70	34
CD19	NM_001770.4	Endogenous	39	58	16	206	47	252	74	33	583	46	56	20	18	62	147	194	158	43	433	78	25	41	133	43	23	2394	65	66	52	181	60	47	37	73	466	40	26	27	39	154	11	115	17	42	451	36	43
CD1A	NM_001763.2	Endogenous	33	82	17	53	14	29	131	11	171	16	20	7	5	155	7	287	31	26	35	161	45	190	33	26	117	104	7	80	22	24	13	32	16	44	537	12	31	19	24	17	37	11	10	13	22	12	10
CD1B	NM_001764.2	Endogenous	12	18	3	13	5	24	21	8	33	13	25	5	5	20	6	25	11	14	29	22	14	33	15	15	17	62	11	28	10	20	13	20	18	40	85	9	17	11	17	5	17	3	3	68	15	16	3
CD1C	NM_001765.2	Endogenous	40	45	14	111	12	77	80	28	163	23	36	9	13	37	11	213	79	43	68	234	54	93	38	52	86	429	16	40	32	21	63	32	37	65	382	17	22	21	38	31	68	24	19	41	59	38	21
CD1D	NM_001766.3	Endogenous	28	53	6	58	17	80	40	43	112	28	53	11	9	19	46	92	56	57	58	91	84	77	68	32	50	107	34	79	35	40	88	36	30	68	164	27	19	30	41	46	33	33	37	69	133	29	18
CD1E	NM_001042583.1	Endogenous	11	23	13	34	10	22	20	14	58	14	18	6	8	26	8	98	27	15	22	75	15	52	24	22	50	86	4	42	6	19	7	23	11	47	257	11	14	14	15	9	21	5	10	37	27	10	8
CD2	NM_001767.3	Endogenous	32	70	18	62	74	207	125	49	133	150	82	79	3	61	34	97	89	23	75	81	45	67	117	156	40	205	54	54	58	180	87	19	29	53	188	30	20	34	40	87	17	35	13	172	113	89	11
CD200	NM_005944.5	Endogenous	207	278	17	234	195	310	222	412	246	178	78	78	30	121	87	677	210	572	229	153	253	106	275	238	628	275	9	598	221	800	287	447	4547	473	274	102	227	149	158	175	399	617	77	92	285	145	307
CD207	NM_015717.2	Endogenous	37	72	13	75	26	64	253	43	216	29	29	33	6	357	12	355	29	45	44	337	47	254	35	152	248	97	8	71	29	23	64	66	49	49	1284	34	87	84	65	18	50	13	51	24	47	35	7
CD209	NM_021155.2	Endogenous	170	267	11	67	172	144	107	96	229	140	68	30	42	89	22	141	22	139	76	52	220	243	83	34	100	156	15	89	33	112	674	151	57	40	142	16	17	62	420	80	119	23	87	121	48	128	27
CD22	NM_001771.2	Endogenous	45	73	12	204	18	209	104	31	642	32	77	44	15	64	68	394	287	76	481	87	27	62	62	61	83	3649	20	74	56	129	141	23	49	61	932	10	21	30	111	97	137	172	16	107	846	1472	95
CD24	NM_013230.2	Endogenous	2047	4060	4608	9225	7038	1337	7635	7693	830	2702	2353	3622	111	990	3008	195	2357	7621	26517	8628	4030	12217	5569	2149	949	1378	36	5017	6090	4093	6241	1523	2901	12296	2422	6781	12773	12612	7084	4301	116	84	2264	18	1157	21	9
CD244	NM_016382.2	Endogenous	20	44	15	20	34	51	43	27	53	28	20	27	6	16	11	93	31	23	33	44	44	68	30	33	28	63	20	44	27	46	43	21	16	27	60	19	17	31	44	32	12	6	16	56	59	20	7
CD247	NM_198053.1	Endogenous	54	111	13	76	79	372	191	56	294	142	176	99	5	69	74	133	83	33	190	94	67	90	163	161	77	410	64	121	126	279	102	52	49	96	560	29	23	77	85	177	43	50	33	226	302	132	21
CD27	NM_001242.4	Endogenous	72	205	14	175	57	884	203	92	1041	208	126	124	10	95	339	332	183	38	297	306	51	64	268	219	118	1177	60	194	104	376	166	58	39	184	811	87	45	75	81	247	50	92	42	405	1019	178	38
CD274	NM_014143.3	Endogenous	72	51	33	47	199	613	175	11	93	95	455	34	7	85	38	99	37	88	78	48	318	154	161	181	51	96	48	192	61	196	54	489	62	123	99	51	36	212	47	63	20	17	8	124	83	58	4
CD276	NM_001024736.1	Endogenous	3270	3044	73	800	2051	2862	2000	1421	1689	1548	829	228	129	1701	609	2871	1435	4783	3060	2034	2215	2810	2462	1815	2021	758	312	3780	3169	2011	1125	2768	2781	1483	827	1834	1964	2272	3571	1118	7024	637	1309	1345	1425	2098	324
CD28	NM_001243078.1	Endogenous	66	75	14	70	15	109	125	26	131	25	73	24	7	42	25	61	25	45	40	42	35	31	56	49	52	313	12	45	30	88	75	25	36	32	202	15	8	37	51	62	25	18	18	108	91	43	9
CD33	NM_001177608.1	Endogenous	40	61	14	45	55	149	51	44	128	56	52	17	15	35	29	173	51	126	67	59	86	127	57	103	59	52	16	61	39	28	65	64	45	47	73	25	21	23	71	39	36	13	30	68	67	51	16
CD34	NM_001025109.1	Endogenous	104	154	16	198	45	142	158	203	83	53	79	92	65	51	56	247	157	311	274	263	204	140	119	163	427	66	13	125	94	84	398	364	90	309	117	68	95	182	113	61	181	50	103	58	301	93	16
CD36	NM_001001548.2	Endogenous	579	1376	21	490	118	497	468	361	654	296	402	89	1249	124	163	597	498	1209	735	1720	2215	608	1984	246	1486	608	185	475	660	278	554	723	186	522	454	271	345	269	2083	580	1209	331	427	542	918	5724	330
CD37	NM_001774.2	Endogenous	43	53	9	41	35	174	70	30	236	37	92	10	3	36	35	111	33	42	105	56	44	142	77	117	61	237	17	60	27	66	44	30	21	56	287	15	16	36	104	45	16	45	23	95	224	44	3
CD38	NM_001775.2	Endogenous	257	122	9	112	157	318	133	111	347	505	144	202	15	59	203	212	255	31	126	172	51	159	341	139	107	435	153	197	127	391	278	62	1109	179	354	76	52	48	506	151	24	26	36	487	621	130	27
CD3D	NM_000732.4	Endogenous	58	184	45	103	147	595	304	70	645	330	210	137	18	159	103	285	187	46	234	221	89	101	375	231	142	984	81	206	157	391	239	55	138	137	776	57	37	129	118	358	54	132	44	357	365	211	31
CD3E	NM_000733.2	Endogenous	49	120	28	97	77	382	226	50	423	160	187	94	8	60	95	170	94	32	115	140	57	92	218	141	87	462	52	121	96	336	123	31	56	80	567	26	20	66	82	142	21	79	33	290	323	134	22
CD3EAP	NM_012099.1	Endogenous	389	265	37	112	176	331	220	180	167	208	154	45	26	149	118	251	139	393	171	169	336	319	338	165	146	141	41	534	458	160	130	240	578	244	235	397	311	461	468	126	220	149	187	176	243	306	58
CD3G	NM_000073.2	Endogenous	26	46	22	48	45	231	108	46	164	125	45	79	6	32	29	73	35	13	69	70	26	52	94	50	30	250	33	71	32	91	73	21	42	49	191	9	10	31	56	101	22	34	14	93	104	50	11
CD4	NM_000616.4	Endogenous	542	650	34	409	508	1291	661	330	1924	778	734	221	48	594	203	1606	575	602	597	733	604	1343	692	779	672	1347	134	656	481	717	683	335	397	475	1503	62	97	236	1015	845	580	169	234	1223	953	544	429
CD40	NM_001250.4	Endogenous	392	502	55	306	1284	512	328	188	722	1504	392	223	54	208	143	664	307	758	308	202	249	1201	366	304	383	1281	196	181	147	487	540	460	922	393	695	786	182	687	542	671	101	63	70	547	428	221	34
CD40LG	NM_000074.2	Endogenous	20	35	35	49	41	82	86	26	169	19	58	38	15	34	25	35	41	20	67	98	24	39	49	65	47	212	11	36	24	61	48	26	31	38	310	20	18	49	41	61	14	56	18	68	113	39	17
CD44	NM_001001392.1	Endogenous	11880	10760	1094	4477	4336	4470	5291	2197	7752	5299	10139	1373	438	2244	1971	6162	4538	4182	10764	4922	5525	5527	4351	6339	5479	2955	333	29093	9045	7756	6863	8214	8071	14040	6222	12103	14967	13599	20664	3470	11116	9311	16793	12071	23576	17477	4994
CD46	NM_172350.1	Endogenous	6904	4919	560	4269	5309	8205	5441	14433	7211	4948	1854	1226	379	5380	1741	5210	3488	14811	13615	9495	4082	12925	15531	7652	3560	8433	383	6464	15994	3782	4191	2539	7909	4604	3789	6053	5458	5416	5097	3340	2541	2372	1475	2438	2625	2817	851
CD47	NM_001777.3	Endogenous	1660	6809	530	2209	7753	4951	5419	4290	4434	5740	3774	710	219	2629	729	3622	2975	13163	4186	3492	2327	20546	1974	2962	1834	6245	346	2935	6188	2668	3097	1210	3302	2330	2614	3392	1103	5823	3939	3527	3374	2524	1082	2745	3057	2202	469
CD48	NM_001778.2	Endogenous	86	124	38	146	203	404	231	60	753	166	221	131	13	122	84	231	219	57	259	166	63	149	266	106	91	1295	93	150	128	261	184	107	95	175	870	56	27	81	137	253	54	156	42	680	516	149	83
CD5	NM_014207.2	Endogenous	45	132	37	123	56	290	176	57	339	103	162	44	18	67	55	184	163	40	110	153	48	90	647	202	67	441	44	97	62	220	111	32	54	97	471	36	58	64	74	146	43	62	39	239	294	101	19
CD53	NM_001040033.1	Endogenous	905	1219	213	952	1429	3496	1303	483	4183	1417	1691	432	84	843	477	2525	591	1051	1501	873	1343	2140	1167	823	1064	4791	660	663	933	1152	1045	715	610	637	2448	119	115	368	1810	1627	312	423	281	2079	1912	854	214
CD55	NM_000574.3	Endogenous	113	61	13	68	88	109	86	97	79	46	63	61	24	54	46	150	91	130	232	142	78	105	135	95	97	67	12	479	113	61	93	83	289	136	81	66	192	70	172	60	31	132	153	126	115	113	17
CD58	NM_001779.2	Endogenous	903	696	106	678	679	1012	549	510	1093	601	403	223	74	591	146	928	515	1298	1202	479	695	1387	924	1107	552	929	103	1010	661	418	665	287	2448	647	775	1758	759	1428	1493	779	1150	502	514	952	725	1362	253
CD59	NM_000611.4	Endogenous	5091	8656	1008	7448	4586	7385	5052	6638	5659	7614	3832	2574	1255	3891	1389	8101	3432	8021	13509	5670	3063	6315	2828	6149	7372	3417	160	6310	4365	3571	11451	5022	4795	8577	5378	11233	3745	5820	9750	6231	10980	5646	15960	5805	8151	12160	932
CD6	NM_006725.3	Endogenous	27	67	23	55	68	215	115	55	217	63	94	67	12	43	52	145	102	28	121	91	46	69	157	125	71	254	31	69	48	140	72	30	59	74	266	40	38	85	73	83	29	49	19	137	195	51	15
CD63	NM_001780.4	Endogenous	4574	6644	229	5519	9277	11770	7186	11611	11002	4829	6482	1633	615	3911	5524	10542	5165	13086	12729	11990	8860	18855	9869	13087	9283	6418	621	11239	8395	3954	7435	6055	4893	6683	9507	4865	3819	7134	8014	4028	25586	22597	14561	41319	9641	18169	5572
CD68	NM_001251.2	Endogenous	794	1074	146	485	1274	2244	1058	431	4933	1432	1594	184	68	670	463	2334	301	1032	946	766	2159	3943	1122	1082	1623	675	259	1067	984	891	627	802	774	1052	1251	1665	343	861	1889	715	1416	418	2398	4137	1584	950	261
CD7	NM_006137.6	Endogenous	30	88	47	54	30	158	105	51	124	125	219	35	14	91	118	116	144	29	185	76	536	79	174	147	56	170	33	134	56	211	89	53	84	105	353	53	40	51	67	80	32	40	24	219	191	102	14
CD70	NM_001252.2	Endogenous	34	40	7	21	24	27	31	12	49	103	114	6	6	20	12	51	18	35	22	18	27	49	27	26	48	60	13	39	36	41	23	25	37	21	46	15	10	24	73	22	13	6	12	25	30	8	2
CD74	NM_001025159.1	Endogenous	9628	11248	2309	8863	13687	21802	16949	5608	27613	33546	22472	4417	971	7070	4660	22883	6563	7505	21865	17759	12621	34761	16219	27552	17575	19350	1725	14338	6906	14700	13901	5538	3399	11396	94394	1585	2315	5178	18089	8789	5984	3890	4143	22435	34255	16230	1405
CD79A	NM_001783.3	Endogenous	104	437	58	809	70	1164	299	174	1948	162	172	198	18	183	953	758	440	66	663	615	69	146	455	357	94	3701	77	440	251	728	265	142	71	335	985	337	109	210	93	501	60	259	76	351	2675	126	80
CD79B	NM_021602.2	Endogenous	52	112	31	282	55	453	132	78	659	86	85	52	29	68	287	344	291	40	389	133	57	98	235	169	62	2473	57	136	80	245	144	51	58	196	951	152	69	61	56	152	34	160	33	134	658	62	46
CD80	NM_005191.3	Endogenous	128	120	13	67	303	213	129	54	208	148	136	26	6	86	28	304	44	209	169	73	87	249	148	327	68	235	34	74	70	139	48	132	110	127	447	17	47	49	125	74	38	22	17	132	127	81	17
CD81	NM_004356.3	Endogenous	8419	10873	365	11161	10281	14636	8611	14709	16026	7640	5394	4394	1468	6598	3287	14499	9087	14978	11129	14791	7951	14534	12419	14623	9789	10818	1280	12529	13717	7645	13568	9097	17938	8034	11264	8267	8855	9958	18824	10129	18046	9683	19924	11970	19796	16113	5054
CD83	NM_004233.3	Endogenous	489	437	47	691	620	1282	944	193	1563	450	1183	70	19	375	333	935	243	392	758	609	274	505	1151	552	945	2146	89	481	407	833	141	378	1433	491	1767	292	243	177	827	286	1270	475	270	785	1150	838	342
CD84	NM_001184879.1	Endogenous	364	389	17	273	570	895	358	281	1469	708	400	131	31	329	141	841	224	418	603	281	508	832	567	454	515	907	154	387	359	438	414	134	230	336	732	47	89	147	615	602	182	137	144	909	497	396	117
CD86	NM_175862.3	Endogenous	167	186	21	109	269	240	136	93	273	240	138	51	14	98	37	349	57	265	88	85	175	360	131	65	170	267	79	91	194	151	124	135	101	95	218	33	41	109	195	164	69	39	54	185	192	101	29
CD8A	NM_001768.5	Endogenous	37	67	18	99	96	386	301	59	208	213	395	126	9	52	153	124	210	21	159	128	66	48	312	218	59	133	57	109	115	474	109	26	50	82	100	34	41	42	79	68	21	29	35	272	271	229	28
CD8B	NM_004931.3	Endogenous	40	51	18	55	184	175	124	121	83	72	116	36	13	24	57	79	164	37	82	97	64	66	518	160	80	63	30	58	70	345	70	41	50	79	100	14	29	120	72	49	25	24	23	153	143	131	10
CD9	NM_001769.2	Endogenous	25270	8684	883	8420	10490	6768	4770	7117	7305	6533	4830	2951	289	4107	4001	5321	3612	17753	5175	5046	8398	19716	5552	11590	4531	4728	288	37260	16999	32398	11264	6898	34046	16266	6188	33734	35163	49903	39644	34063	1564	1013	1601	926	3078	4103	507
CD96	NM_005816.4	Endogenous	107	139	39	167	148	567	268	114	390	220	207	147	15	104	78	243	213	61	280	173	70	108	264	511	114	543	89	128	146	334	145	50	110	135	499	49	46	105	95	185	25	81	38	300	396	157	25
CD97	NM_078481.2	Endogenous	799	980	231	1284	915	2821	1780	433	3586	2011	3327	594	140	688	338	1725	1030	1131	1198	1592	1187	2479	1422	4478	1256	2175	574	699	1146	865	1423	797	832	943	1981	506	277	583	1463	607	2944	525	784	2130	2201	2217	362
CD99	NM_002414.3	Endogenous	5695	6101	183	3908	5389	6854	8396	7765	4629	3801	2663	1367	681	2833	2423	9627	6795	11277	10236	3560	4393	4456	1925	4899	6449	5351	494	7642	8472	7956	4320	6045	2362	3827	4214	2822	3647	3408	2916	6351	3839	5166	10561	4891	7333	3691	777
CDH1	NM_004360.2	Endogenous	5321	4230	877	3368	4144	14529	6044	5629	6339	2388	3951	990	122	6673	3139	2777	2613	6304	5252	5495	3332	13582	6861	5714	2669	5711	26	8197	6022	4183	3162	681	11088	7933	6425	10743	9826	14533	9136	4899	3387	4428	913	742	1124	27	245
CDH5	NM_001795.3	Endogenous	230	375	20	396	87	379	324	431	212	208	312	135	142	116	182	410	448	818	685	452	430	340	178	217	752	209	16	217	222	138	850	879	271	687	214	167	153	349	320	280	308	90	129	169	463	161	50
CDK1	NM_001786.4	Endogenous	515	428	56	120	717	1639	573	399	174	365	183	71	23	217	338	187	149	1841	499	226	250	1400	1715	297	114	1341	241	1032	3827	884	290	550	2332	336	224	949	726	1043	412	658	1100	161	173	453	119	616	284
CDKN1A	NM_000389.2	Endogenous	1208	1495	940	2172	549	707	1345	431	885	474	1444	113	48	347	151	538	527	1252	1721	380	581	753	1036	1004	1263	510	94	1286	1092	593	429	795	353	955	630	1419	991	751	2759	945	307	677	664	280	1594	565	173
CEACAM1	NM_001712.3	Endogenous	30	118	485	421	122	47	339	216	215	78	43	41	13	136	89	118	209	231	295	420	375	261	50	363	59	162	6	55	279	657	106	29	24	480	862	214	102	906	107	142	257	147	255	2179	107	99	213
CEACAM6	NM_002483.4	Endogenous	762	1045	980	1845	672	5242	22181	1990	15221	2060	450	1402	8	12324	4456	17166	2138	13627	42607	5669	443	2389	152	16337	4295	9810	7	248	13293	1124	2683	194	11	1976	7791	1123	697	2299	1584	9932	9	4	321	7	380	7	7
CEACAM8	NM_001816.3	Endogenous	12	20	18	11	17	59	18	12	247	8	17	7	12	13	11	248	20	18	26	30	95	31	26	53	7	11	11	21	9	15	18	18	15	16	20	23	13	24	22	11	6	14	7	18	15	10	14
CEBPB	NM_005194.2	Endogenous	2716	5530	505	3979	4880	4238	1808	2711	3862	4815	4282	580	320	2233	1120	3340	2714	3983	9573	2433	3763	6228	2865	2730	3855	2364	459	3095	6617	1972	2069	3522	2888	3651	1434	5578	2584	6907	5749	2221	2988	388	508	1495	1424	1464	408
CFB	NM_001710.5	Endogenous	151	1301	225	1602	2575	457	666	3471	431	3298	172	242	48	277	142	1715	368	131	1947	2266	225	5747	513	757	564	263	49	434	471	946	1155	263	134	818	251	357	228	309	224	1063	57	25	43	131	240	146	19
CFD	NM_001928.2	Endogenous	224	417	10	703	138	536	378	228	1219	177	400	112	635	106	73	415	251	118	347	367	542	175	207	132	850	208	31	448	123	184	354	282	222	172	233	99	123	203	223	229	628	142	174	104	355	213	31
CFI	NM_000204.3	Endogenous	348	482	24	871	188	806	958	2884	1616	839	324	190	111	413	513	3064	1162	565	684	4202	621	5638	621	651	1587	459	27	561	977	359	1324	523	202	690	1290	198	114	133	546	734	177	65	344	202	1395	135	57
CFP	NM_002621.2	Endogenous	15	53	13	20	28	70	42	30	106	20	70	29	11	17	11	36	33	19	26	35	45	72	26	19	41	92	25	41	17	31	72	37	24	60	103	14	25	38	19	17	28	17	27	51	50	10	20
CHIT1	NM_003465.2	Endogenous	231	42	20	48	52	459	193	40	10237	208	175	16	11	1030	61	79	37	22	321	78	57	74	374	142	47	50	40	162	81	363	27	20	36	1436	56	43	41	60	856	202	74	71	8	3934	519	34	198
CHUK	NM_001278.3	Endogenous	538	644	59	515	550	1033	756	1175	608	524	419	170	41	483	271	577	400	1330	758	575	440	1022	1239	519	369	814	145	830	981	419	572	540	1560	560	527	642	600	747	556	345	747	416	351	540	441	300	264
CKLF	NM_181640.2	Endogenous	959	1015	68	488	885	1815	1523	713	3004	900	473	234	60	1208	390	1578	782	2489	1061	958	1247	1607	1926	940	1117	1398	222	875	2140	443	696	709	1797	523	1770	591	249	1232	986	630	1133	680	546	1057	751	1105	643
CLEC4A	NM_194448.2	Endogenous	135	220	57	151	301	255	203	130	433	187	155	49	20	199	82	530	116	228	266	173	346	315	204	236	208	201	49	157	127	193	199	150	98	214	455	62	85	81	230	164	113	55	72	334	194	121	29
CLEC4C	NM_203503.1	Endogenous	27	30	11	30	25	39	24	30	81	36	48	12	5	26	26	51	45	30	62	30	20	55	47	26	26	100	49	34	24	44	27	61	23	44	255	29	26	37	29	23	17	12	20	52	57	37	18
CLEC5A	NM_013252.2	Endogenous	196	249	14	70	1273	277	283	58	436	300	240	10	10	257	36	582	78	841	171	80	219	857	170	271	221	44	56	58	105	41	41	302	225	49	212	14	36	58	266	117	30	25	13	70	25	85	7
CLEC6A	NM_001007033.1	Endogenous	13	16	24	10	99	21	16	25	22	41	11	11	10	13	15	24	18	18	19	24	7	31	39	14	15	28	9	20	22	33	13	12	8	22	25	17	12	22	20	22	7	6	6	71	13	25	7
CLEC7A	NM_197954.2	Endogenous	253	223	27	135	366	759	192	145	692	351	170	54	10	125	31	689	106	419	307	179	285	435	246	474	262	172	106	99	148	142	218	128	94	133	314	49	54	56	502	155	64	43	33	269	144	149	13
CLU	NM_001831.2	Endogenous	25	26	8	66	17	32	17	31	22	19	14	18	7	18	8	28	27	31	31	31	9	54	36	30	19	29	7	17	15	21	93	26	28	60	27	21	33	20	32	12	8	6	10	10	14	9	9
CMA1	NM_001836.2	Endogenous	32	76	8	80	14	27	9	22	36	43	17	13	28	7	9	35	33	49	30	31	23	24	32	23	69	34	9	23	14	25	26	19	16	17	29	20	14	27	28	13	144	12	9	9	12	22	8
CMKLR1	NM_004072.1	Endogenous	270	311	27	210	458	738	253	238	640	491	269	163	103	221	80	514	126	539	391	270	454	728	445	232	539	466	169	316	175	322	386	303	139	309	409	38	79	143	654	417	279	123	163	761	479	327	63
COL3A1	NM_000090.3	Endogenous	64530	127820	81	8219	65242	117657	57494	50720	24978	37284	4793	5000	4000	42782	21221	311579	82409	216802	70496	12480	57374	22128	27607	19191	80469	6380	2612	55575	57328	15966	23220	112620	41296	11755	19027	26726	18169	33341	40129	64758	57640	3895	15484	8119	46270	21466	1772
COLEC12	NM_130386.2	Endogenous	187	277	5	296	217	237	207	283	330	162	118	15	55	229	37	657	237	345	161	227	177	314	68	228	327	69	8	108	43	134	239	43	31	82	74	30	49	89	239	193	52	21	47	96	128	106	22
CR1	NM_000651.4	Endogenous	299	555	52	272	79	417	210	215	1427	263	519	21	56	198	99	1211	147	209	550	328	792	553	238	104	225	1397	116	362	154	216	1316	104	59	99	490	20	39	108	790	689	81	224	209	831	383	128	171
CR2	NM_001006658.1	Endogenous	19	46	18	76	25	204	27	34	486	23	19	18	11	33	27	119	48	78	309	35	22	37	31	23	30	1039	8	24	28	29	14	36	36	29	190	26	33	20	38	27	21	25	10	7	211	14	22
CREB1	NM_004379.3	Endogenous	1582	851	84	665	659	1364	1152	649	921	809	328	368	77	672	261	1179	508	1570	674	780	687	1088	1071	503	651	1372	159	814	1294	712	876	628	2035	1147	858	800	649	1022	757	813	1135	435	813	570	1226	725	247
CREB5	NM_182898.2	Endogenous	785	464	47	299	159	535	635	156	174	113	333	73	56	225	56	228	183	162	299	109	127	323	116	279	285	108	25	1443	52	121	267	241	197	443	220	78	335	135	1416	149	184	387	66	279	371	139	80
CREBBP	NM_004380.2	Endogenous	71	57	19	58	61	93	77	59	62	39	29	31	14	36	41	88	66	89	100	111	62	83	89	46	78	62	20	80	61	46	66	58	135	103	124	68	65	115	82	31	59	33	69	26	123	53	25
CRP	NM_000567.2	Endogenous	12	20	8	8	13	17	10	16	8	7	12	6	9	7	7	10	11	11	13	10	8	14497	10	16	9	6	48	6	10	15	12	10	277	24	9	17	6	15	15	8	5	5	2	7	8	6	3
CSF1	NM_000757.4	Endogenous	213	233	31	287	789	357	340	280	454	381	472	68	54	229	68	742	212	712	283	309	235	887	328	364	541	650	34	273	343	167	372	300	231	261	403	168	77	223	339	272	185	57	128	179	249	184	42
CSF1R	NM_005211.2	Endogenous	114	144	24	103	80	188	144	44	144	94	131	20	14	47	47	170	43	111	92	76	109	310	105	79	164	117	32	92	56	102	130	68	42	67	287	28	27	132	256	75	56	38	86	155	225	96	18
CSF2	NM_000758.2	Endogenous	15	38	4	14	12	91	70	8	56	12	50	4	8	26	7	56	8	30	14	36	56	41	19	106	13	20	4	20	15	15	9	135	24	22	112	17	10	21	50	11	7	8	4	28	15	12	2
CSF2RB	NM_000395.2	Endogenous	363	838	1042	599	1098	899	623	329	1144	524	776	373	87	404	422	1025	337	421	1256	590	460	896	686	426	807	1363	261	690	409	714	1421	600	198	1070	1394	248	205	383	576	500	287	192	272	1055	882	293	87
CSF3	NM_000759.3	Endogenous	13	30	8	20	12	18	18	14	20	9	98	5	9	11	8	20	21	23	21	17	14	27	20	23	19	26	7	20	20	14	20	25	27	17	15	16	11	70	36	9	7	4	6	11	12	6	3
CSF3R	NM_156038.2	Endogenous	158	614	240	421	123	347	305	4444	293	284	1117	112	43	355	153	503	854	449	879	554	684	357	260	209	332	146	261	224	566	207	552	217	61	124	966	25	35	138	267	424	59	107	129	268	424	88	31
CT45A1	NM_001017417.1	Endogenous	5450	23	11	14	2628	46	19	14	23	353	23	12	7	16	13	41	46	42	39	36	22	37	2798	31	24	3457	818	52	23	17	22	27	35	40	25	14	4098	3197	1509	18	15	34	9	13	21	17	24
CTAG1B	NM_001327.2	Endogenous	24	20	23	28	44	39	36	24	22	27	16	17	20	23	26	55	440	46	63	35	27	38	5539	41	26	36	10	21	36	30	25	39	39	30	40	39	36	36	55	26	12	9	13	13	24	17	12
CTAGE1	NM_172241.2	Endogenous	10	14	13	6	12	9	17	7	12	6	12	5	6	2	5	15	18	13	12	25	9	11	15	15	9	13	4	7	5	12	8	13	13	15	21	13	17	9	10	8	5	4	5	6	5	5	7
CTCFL	NM_001269042.1	Endogenous	2	12	12	6	10	6	20	4	3	6	6	6	6	7	9	9	10	14	6	16	16	16	205	9	5	23	477	55	5	10	11	17	16	13	10	16	118	1106	40	3	4	6	1	6	7	8	5
CTLA4	NM_005214.3	Endogenous	140	283	27	106	125	641	156	64	356	244	381	36	5	129	99	242	199	60	450	232	66	143	399	358	239	582	68	208	139	466	163	70	87	311	552	109	63	77	163	133	2284	77	25	542	327	238	146
CTSG	NM_001911.2	Endogenous	55	203	13	160	27	41	39	20	87	33	52	27	40	19	20	51	34	54	67	53	38	33	99	28	117	68	3	100	47	83	188	29	24	30	63	19	17	45	95	32	221	18	14	15	41	49	12
CTSH	NM_004390.3	Endogenous	1325	1559	55	707	1891	2257	1030	4001	3614	1269	1279	563	67	953	272	2498	1951	2635	1779	4740	957	2296	2234	2151	1662	3434	411	721	6773	1092	1425	526	910	777	6630	5249	163	618	2551	2299	1331	390	275	2176	2058	1307	196
CTSL	NM_001912.4	Endogenous	1126	1337	122	534	3453	1108	589	787	1528	1874	1003	235	127	1005	364	1827	447	1799	585	674	1569	2727	727	578	1024	1387	593	1368	740	674	813	927	1459	664	500	85	254	444	1560	1424	2693	395	1212	1550	572	1010	1694
CTSS	NM_004079.3	Endogenous	1730	1950	287	1904	4979	5296	2449	1958	13604	8674	3447	1548	164	2131	742	4968	960	1782	1800	2028	2964	4972	1999	3701	2287	6865	855	1338	2029	2624	3754	1294	880	2310	2895	395	369	674	2521	3287	2273	789	1183	5437	2568	2728	608
CTSW	NM_001335.3	Endogenous	24	36	13	50	65	154	63	51	153	87	95	43	11	22	45	42	68	29	63	100	96	202	136	64	24	68	24	30	63	54	36	21	38	30	118	31	23	27	59	35	20	15	13	115	191	62	17
CX3CL1	NM_002996.3	Endogenous	890	387	68	1655	2175	3589	1358	431	1485	185	433	555	50	1585	51	773	1349	3092	292	305	275	720	218	1625	640	440	5	908	2761	1239	1699	442	1343	1047	1437	1369	461	819	1007	969	137	124	231	143	431	346	31
CX3CR1	NM_001337.3	Endogenous	37	56	16	176	34	49	109	63	62	53	30	51	15	46	11	176	63	58	49	133	53	107	62	57	150	163	16	46	34	24	145	30	32	55	417	18	23	56	159	67	44	16	28	27	345	36	12
CXCL1	NM_001511.1	Endogenous	94	943	938	1420	518	102	750	577	258	1575	1367	1142	65	1975	125	325	116	144	1110	363	77	1848	234	274	541	172	33	477	9169	1141	1902	4178	141	434	65	176	73	2337	730	1702	34	1633	202	116	96	29	125
CXCL10	NM_001565.1	Endogenous	86	122	93	39	8018	426	104	33	288	2537	280	316	11	354	51	248	64	111	190	69	109	422	699	276	213	524	785	125	308	962	120	184	371	158	110	23	34	87	241	766	48	27	28	495	256	516	20
CXCL11	NM_005409.4	Endogenous	23	63	66	47	4700	294	57	38	128	1239	228	282	7	134	34	144	88	90	189	76	65	147	276	527	80	217	328	54	112	785	131	158	75	148	90	32	34	53	71	255	39	23	23	481	248	382	14
CXCL12	NM_000609.5	Endogenous	1334	682	7	4674	640	887	576	485	1562	1395	305	358	560	250	299	3345	717	4533	411	291	915	818	415	468	4042	1763	17	833	536	448	2129	546	245	449	980	158	56	274	897	692	1153	481	257	675	1502	933	185
CXCL13	NM_006419.2	Endogenous	112	228	15	535	901	921	44	209	805	872	585	35	8	189	206	221	139	58	857	73	30	101	607	249	96	4869	122	238	498	1425	57	82	63	139	374	44	56	49	54	421	21	68	16	109	966	546	19
CXCL14	NM_004887.4	Endogenous	9848	15178	253	3737	3004	1298	5889	2039	1290	1130	23	466	973	3195	65	7136	506	9431	177	1158	429	303	909	2092	12319	1717	12	1967	493	2867	2689	515	24819	17517	814	1766	15201	1208	29443	681	3123	359	1417	155	299	1138	64
CXCL16	NM_001100812.1	Endogenous	874	848	109	588	814	1292	799	533	1906	846	1255	133	37	348	193	1151	583	1127	999	1634	811	1886	567	631	910	925	81	900	925	465	491	408	801	497	720	488	269	1193	1295	476	284	132	183	639	749	265	56
CXCL2	NM_002089.3	Endogenous	356	658	113	2242	691	1509	2064	1981	1498	262	9030	85	104	1483	400	697	506	339	2229	2888	406	2879	442	1432	2086	863	27	503	886	757	241	1314	94	198	484	2384	33	169	757	513	43	30	43	802	1398	64	35
CXCL3	NM_002090.2	Endogenous	116	231	72	639	774	288	263	401	238	62	839	43	41	284	59	199	86	156	398	966	108	541	248	136	345	72	12	210	327	200	74	714	41	54	51	41	28	126	341	198	21	23	41	257	126	25	12
CXCL5	NM_002994.3	Endogenous	43	109	20	85	341	54	89	658	514	16	275	23	25	582	62	342	73	216	49	152	106	56	45	191	90	132	13	15	29	30	49	683	24	23	28	53	19	76	291	30	12	5	32	14	22	13	2
CXCL6	NM_002993.3	Endogenous	25	371	244	146	112	25	410	163	22	17	77	417	6	195	15	63	53	38	134	15	22	749	428	107	40	38	6	52	1892	310	364	584	153	147	17	128	52	756	702	613	15	1	59	29	27	4	94
CXCL9	NM_002416.1	Endogenous	164	291	325	177	16382	4003	285	103	851	5182	3065	3381	36	1150	716	802	254	196	842	385	703	540	4506	1059	873	3172	712	881	881	6040	420	449	387	980	903	100	58	235	268	1358	437	193	158	8670	1550	4265	78
CXCR1	NM_000634.2	Endogenous	29	118	124	56	23	28	37	29	18	19	102	16	16	34	22	37	47	44	51	43	22	48	36	39	39	23	25	31	40	30	68	44	46	52	33	37	29	56	39	37	13	19	38	19	26	23	15
CXCR2	NM_001557.2	Endogenous	28	345	303	242	11	73	71	61	120	22	344	26	21	50	18	77	34	34	67	59	46	57	23	53	22	38	125	47	120	65	189	123	44	37	152	7	14	130	40	65	26	25	35	10	39	10	16
CXCR3	NM_001504.1	Endogenous	33	50	9	47	53	314	132	33	163	124	143	75	11	46	48	110	86	30	91	94	41	60	129	136	51	260	63	55	46	119	88	30	28	73	172	16	17	38	43	93	28	26	26	157	160	102	12
CXCR4	NM_003467.2	Endogenous	2285	2093	77	3045	1363	5516	1845	1923	5902	1689	3861	421	77	1308	1974	2306	2312	1976	6228	830	1046	1007	1844	907	2469	3695	425	5259	4312	5199	662	1062	806	793	2639	448	382	494	2017	1756	272	1340	334	2517	5110	1281	592
CXCR5	NM_001716.3	Endogenous	18	21	7	39	9	51	21	12	75	16	18	4	4	16	8	44	21	24	49	15	12	26	34	19	13	307	5	26	15	31	18	14	29	13	123	12	22	10	34	32	13	18	8	18	76	12	3
CXCR6	NM_006564.1	Endogenous	34	100	29	63	69	243	109	34	225	143	76	57	3	45	50	105	87	34	76	107	43	88	148	100	75	124	53	98	67	235	84	25	58	64	142	29	23	68	90	103	20	9	16	245	113	84	19
CYBB	NM_000397.3	Endogenous	643	559	49	460	1315	2064	1122	266	3696	1414	1350	212	45	667	289	2331	188	848	724	689	1508	2462	942	447	1117	1729	393	597	507	898	827	392	355	519	1658	55	79	310	1069	1138	309	222	368	2796	1442	792	141
CYFIP2	NM_001037332.2	Endogenous	129	184	34	237	137	723	282	267	661	194	152	110	46	133	118	310	226	172	304	847	87	201	167	223	278	911	74	176	128	209	225	165	572	229	860	34	122	227	431	236	102	136	31	1236	373	100	114
CYLD	NM_015247.1	Endogenous	900	1131	111	827	715	1213	717	531	1043	722	644	286	82	353	366	1016	693	1010	1335	760	446	968	1035	730	670	1426	126	918	977	731	882	578	1214	1167	1762	608	589	1104	1078	653	882	451	457	729	1128	797	155
DDX43	NM_018665.2	Endogenous	22	34	11	69	115	31	157	17	31	21	111	14	11	13	9	8	63	354	175	16	10	417	259	123	28	243	6	27	18	13	15	30	281	43	27	21	126	129	22	34	11	7	9	199	23	45	9
DDX58	NM_014314.3	Endogenous	267	950	40	154	1016	682	987	172	408	404	210	118	36	412	84	440	218	696	323	246	599	904	410	302	237	430	266	412	293	586	287	537	384	379	531	235	1300	351	1470	195	89	106	100	279	554	122	33
DEFB1	NM_005218.3	Endogenous	36	24	33	104	29	37	22	22	13	13	17	10	8	9	20	30	37	30	91	30	19	51	34	40	34	36	6	26	129	25	50	32	34	117	17	187	39	37	88	45	10	4	8	11	25	7	12
DMBT1	NM_007329.2	Endogenous	22	5132	27	13722	912	26	559	441	407	36	916	370	29	33	64	6612	1749	42	1306	34998	34	242	331	36	2675	26	19	1997	275	1185	4734	70	37	13859	319	490	647	21	36	4797	9	5	156	8	1116	14	13
DOCK9	NM_001130048.1	Endogenous	886	1401	231	981	544	1500	1514	1410	1561	562	518	451	136	1712	196	936	923	2319	1561	742	697	606	894	1063	883	636	43	834	1315	523	1226	774	890	1375	837	983	588	4237	2834	825	1459	216	319	249	611	306	1455
DPP4	NM_001935.3	Endogenous	170	200	25	68	160	2381	376	349	1569	96	758	98	38	1047	92	1005	259	908	137	1167	593	1511	68	1706	158	212	54	118	104	87	100	101	46	95	1494	42	32	118	111	214	112	29	34	58	129	73	15
DUSP4	NM_057158.2	Endogenous	124	210	13	535	85	350	634	3980	200	379	465	107	38	306	740	175	205	287	2143	1903	67	893	838	274	255	489	47	57	509	437	233	177	78	268	194	126	89	67	271	64	7151	1930	280	5229	1904	2533	817
DUSP6	NM_001946.2	Endogenous	1167	1110	75	1533	488	7065	5806	1161	3061	417	2325	366	167	2080	306	1524	1082	6899	7328	757	3325	1447	1093	3621	1513	1494	858	2237	2256	799	1165	1436	438	914	1920	754	459	1257	2032	405	2369	1966	333	4679	3677	1274	493
EBI3	NM_005755.2	Endogenous	14	14	2	17	22	28	13	26	18	10	12	12	4	10	10	20	14	7	21	13	13	30	18	21	20	27	9	31	14	21	14	10	18	19	43	13	9	11	41	5	8	4	7	28	36	15	4
ECSIT	NM_001142464.2	Endogenous	508	367	41	237	161	356	194	166	268	236	135	110	53	108	48	352	172	419	254	356	162	268	323	211	250	285	46	674	523	405	304	259	1478	594	222	543	459	667	689	168	352	99	145	172	251	259	64
EGR1	NM_001964.2	Endogenous	1786	450	108	1916	171	1770	1071	488	690	172	1035	264	36	307	240	325	498	554	2339	471	629	344	744	1255	3557	263	66	1951	941	753	271	2237	264	983	408	1776	701	755	2628	128	405	230	307	559	1552	410	103
EGR2	NM_000399.3	Endogenous	465	118	29	503	274	793	151	68	258	83	95	35	9	86	61	226	95	126	126	135	64	124	288	232	558	141	23	362	180	275	49	278	132	122	176	237	89	366	351	156	107	23	100	270	164	60	24
ELANE	NM_001972.2	Endogenous	11	23	20	11	20	60	26	19	45	15	22	12	10	14	9	52	29	38	12	22	29	38	51	44	23	32	7	17	23	23	23	28	46	44	35	29	21	23	52	6	12	7	7	11	29	13	4
ELK1	NM_005229.3	Endogenous	230	177	3	99	102	244	229	128	174	167	145	58	32	79	116	218	226	224	302	222	163	214	319	98	152	199	36	485	455	251	115	235	262	241	346	155	187	203	187	140	269	128	144	190	219	239	63
ENG	NM_001114753.1	Endogenous	862	1196	8	923	628	1303	1198	1418	1689	819	824	313	307	562	321	1529	1236	1876	945	1433	1552	1675	841	1235	2234	713	74	668	681	615	2831	2565	536	1923	1391	573	605	1424	1394	742	1033	340	924	586	1374	880	180
ENTPD1	NM_001098175.1	Endogenous	274	413	24	336	118	626	361	265	483	174	174	164	64	157	211	493	303	312	286	233	206	345	238	614	501	427	22	131	126	224	512	458	180	567	593	181	220	188	346	120	1857	51	143	501	505	166	653
EOMES	NM_005442.2	Endogenous	18	26	8	22	21	75	14	17	21	14	18	7	5	9	5	27	16	15	31	17	17	19	23	25	16	40	4	42	16	30	13	10	27	21	28	11	13	19	42	18	10	23	12	20	34	50	33
EP300	NM_001429.2	Endogenous	1614	1260	104	996	1424	1707	1348	1510	1333	1037	650	466	123	895	671	1517	1110	1974	2460	1431	986	1758	1765	1366	857	1442	208	1816	1961	1580	1293	961	2619	1506	1085	2014	1659	2703	2404	1141	1568	1255	1203	1717	1623	1317	358
EPCAM	NM_002354.1	Endogenous	3440	256	23	526	1911	7131	3367	4795	2792	2195	2088	441	45	2914	1478	929	1769	12034	4523	6390	2618	5930	8758	2664	942	2843	5	4378	3964	441	895	1212	10975	1859	2381	1072	3306	1145	1856	918	13	5	464	7	222	11	2
ETS1	NM_005238.3	Endogenous	874	2970	48	1278	1434	2494	1156	1122	2059	949	1901	485	208	953	314	2027	1490	2480	1567	969	1254	1637	729	632	1640	3358	226	700	1652	1043	1767	2522	940	1206	1666	1053	417	832	1257	1379	2065	1152	4908	1565	3016	3509	343
EWSR1	NM_013986.3	Endogenous	2049	1986	135	1454	1775	2434	2181	3102	1707	1289	1273	758	169	1205	821	1795	1422	2706	3398	2058	1480	3535	3790	2424	1474	1931	371	4549	3221	2659	2083	1776	5763	3100	1802	3367	3721	4584	4316	1201	2909	2051	3017	1947	3117	2360	629
F12	NM_000505.3	Endogenous	178	69	30	84	39	153	64	25	75	89	13	25	4	25	12	34	32	26	81	109	94	889	131	32	17	112	45	193	127	50	80	159	634	29	42	213	235	446	296	46	31	7	71	16	24	51	127
F13A1	NM_000129.3	Endogenous	2658	3667	16	1633	216	5508	3262	1097	562	1757	1301	328	561	1319	109	2952	437	1857	600	668	5026	4133	1006	608	2717	589	54	968	730	1340	6962	714	88	305	1870	52	212	745	7152	1957	1195	194	642	619	2331	1181	126
F2RL1	NM_005242.3	Endogenous	597	763	46	144	49	218	391	170	196	70	539	44	18	178	36	153	228	228	425	343	305	571	64	236	120	130	12	827	362	230	146	756	651	595	198	308	397	96	797	67	39	16	93	12	71	21	6
FADD	NM_003824.2	Endogenous	161	271	29	63	280	205	253	124	132	93	102	26	15	93	144	148	78	234	329	120	149	187	136	61	107	110	21	224	162	600	114	135	318	244	217	213	120	283	318	66	140	138	167	186	246	196	56
FAS	NM_000043.3	Endogenous	51	77	14	64	106	229	63	45	54	51	60	23	4	50	33	171	74	122	66	36	54	79	48	57	76	64	10	58	67	64	72	58	42	56	106	28	29	63	57	55	37	37	24	72	44	30	11
FCER1A	NM_002001.2	Endogenous	65	134	25	295	15	70	136	49	221	39	66	79	35	227	8	650	99	39	69	255	44	350	52	51	232	270	11	78	46	57	200	52	19	59	867	18	30	32	34	38	148	37	52	11	109	35	9
FCER1G	NM_004106.1	Endogenous	1209	1496	131	579	2350	2020	1535	663	3844	1510	2350	325	78	977	900	2234	688	1384	637	941	1822	3490	2502	1769	1636	866	401	1335	1145	1637	910	967	631	843	2066	147	249	466	2483	1170	569	398	490	2488	1840	1100	358
FCER2	NM_002002.4	Endogenous	21	19	18	98	18	52	27	23	274	20	16	14	11	19	20	108	25	18	100	54	28	41	27	15	28	936	16	26	18	25	32	36	19	22	284	15	19	24	19	22	16	37	10	11	68	17	27
FCGR1A	NM_000566.3	Endogenous	34	30	7	40	68	67	47	27	71	66	44	17	8	37	16	88	17	75	42	28	46	98	54	56	18	34	20	26	31	29	91	32	54	27	42	20	16	42	53	56	18	28	20	35	34	44	11
FCGR2A	NM_021642.3	Endogenous	2271	3325	519	1287	3367	4394	1141	1695	3874	2864	2247	250	141	1848	502	4029	731	5329	1611	1009	2516	6567	1753	1883	1745	598	307	1618	1615	1172	1992	2751	1257	456	1731	110	359	936	5285	1346	375	405	789	1246	1167	1040	107
FCGR2B	NM_001002273.1	Endogenous	265	328	50	280	1696	896	272	343	1027	879	513	30	66	326	374	690	255	167	318	176	325	616	343	214	314	382	122	261	283	154	542	204	100	123	393	75	45	104	180	380	138	289	85	459	621	134	46
FCGR3A	NM_000569.6	Endogenous	1360	1154	184	269	2970	2938	1094	680	1986	2985	1355	218	40	914	445	3372	224	1720	717	547	1908	4440	1389	364	1152	250	527	530	1181	881	859	711	1213	269	671	38	80	372	2646	1816	268	642	176	1205	967	1651	88
FEZ1	NM_005103.4	Endogenous	472	1272	21	254	145	254	284	357	125	119	101	87	47	91	43	455	301	341	244	158	158	162	169	165	265	128	25	613	579	276	403	390	1639	300	115	648	271	703	1396	223	702	37	57	35	236	52	24
FLT3	NM_004119.1	Endogenous	25	35	8	29	25	77	43	13	68	15	16	13	5	14	17	51	32	22	60	35	22	42	32	21	20	101	9	18	27	54	28	18	23	30	203	22	15	34	50	12	19	6	13	28	53	20	8
FLT3LG	NM_001459.3	Endogenous	127	202	17	128	212	272	202	113	241	216	144	107	28	82	65	263	139	178	132	161	109	250	214	276	178	295	47	181	134	254	264	144	287	285	498	247	198	200	190	119	192	50	42	120	287	98	30
FN1	NM_212482.1	Endogenous	32924	30188	14	2724	32409	58633	12871	17415	16051	30111	5769	529	575	18773	3143	69143	21329	66381	11966	6607	19054	26899	14934	12224	25995	3984	522	13636	20726	2330	3936	22060	19676	4192	5530	4430	4278	5135	36862	27933	2232	7356	1331	6891	8668	5104	6383
FOS	NM_005252.2	Endogenous	14117	3121	230	11745	328	14570	5894	5317	5409	546	8701	1062	156	602	1878	727	3621	1443	13772	4654	956	324	3363	4761	20847	2397	159	1054	5348	3733	1804	12525	258	3039	1689	6713	907	1046	14011	2858	3758	1909	2347	8099	16402	2691	839
FOXJ1	NM_001454.3	Endogenous	57	95	88	90	391	521	508	1296	287	533	174	1244	81	1122	96	138	237	2647	248	772	586	58	236	288	110	2215	55	81	103	163	2238	253	80	512	372	114	186	285	58	61	35	23	29	40	92	46	41
FOXP3	NM_014009.3	Endogenous	70	149	22	35	41	209	119	43	166	68	45	19	15	54	34	140	39	58	88	49	71	135	109	102	66	180	16	117	51	131	80	47	87	153	320	71	42	66	67	70	49	18	15	127	115	87	14
FPR2	NM_001462.3	Endogenous	43	339	163	133	66	149	44	36	236	56	336	35	20	63	36	75	56	88	62	40	66	133	39	34	26	25	68	37	70	46	64	93	63	34	42	28	32	42	153	69	7	13	18	49	43	34	12
FUT5	NM_002034.2	Endogenous	76	77	21	79	61	126	86	55	80	62	57	28	15	45	36	92	67	102	110	95	65	115	84	62	75	94	17	89	108	96	62	88	146	103	58	70	62	92	129	50	62	26	48	50	80	58	20
FUT7	NM_004479.3	Endogenous	23	36	23	23	46	63	31	15	59	41	39	17	5	28	12	76	30	46	34	22	27	71	36	22	27	122	18	27	16	44	36	28	18	39	153	15	16	37	35	17	14	15	10	22	44	31	6
FYN	NM_002037.3	Endogenous	542	852	26	551	441	2686	640	631	790	312	1436	243	112	443	462	797	730	1092	689	374	394	219	1657	661	547	893	127	827	265	760	767	723	540	688	906	193	542	387	838	360	876	613	1075	1544	2066	574	521
GAGE1	NM_001040663.2	Endogenous	32	22	8	24	27	29	37	33	30	18	45	21	7	17	36	31	26	48	33	32	19	38	49	25	33	42	15	38	28	35	23	26	48	36	32	18	31	37	25	8	19	24	9	13	19	15	28
GATA3	NM_001002295.1	Endogenous	12	19	8	19	21	49	21	11	23	26	23	12	6	15	14	24	28	28	71	20	12	41	24	17	15	21	4	27	63	14	10	12	20	18	54	41	14	36	45	8	16	13	7	17	21	11	10
GNLY	NM_006433.2	Endogenous	74	423	16	71	377	283	502	63	246	278	368	83	19	56	99	80	115	44	86	248	145	68	414	2120	51	291	164	182	216	319	306	157	289	71	255	236	106	178	203	264	41	24	10	181	256	121	13
GPI	NM_000175.2	Endogenous	8544	2125	207	1111	2995	2655	4535	2093	1763	5421	1009	419	249	1116	1400	2009	2167	1868	1683	2680	1913	10592	3036	2321	1776	4121	625	8583	11980	3010	1446	1889	6852	2890	1428	4750	8846	6314	11398	2308	3912	1621	2349	2262	1749	4201	1751
GTF3C1	NM_001520.3	Endogenous	1060	1042	90	726	684	1054	1008	1170	717	731	401	361	92	522	724	1270	924	2094	2330	1099	765	1112	1992	713	792	1036	150	2437	2528	777	996	751	2329	1741	867	955	2294	2274	1240	674	1278	620	1008	755	974	1323	475
GZMA	NM_006144.2	Endogenous	149	282	66	140	306	898	501	95	463	350	284	559	16	129	218	471	224	63	172	260	279	113	399	251	180	456	274	500	298	686	326	103	328	61	320	138	53	200	254	592	51	59	44	825	289	281	41
GZMB	NM_004131.3	Endogenous	88	285	94	70	670	287	172	75	219	630	756	140	18	70	316	160	265	27	240	77	45	137	1471	172	49	333	589	188	333	809	131	251	160	66	582	74	38	123	169	286	30	26	15	419	251	309	20
GZMH	NM_033423.3	Endogenous	36	53	9	46	116	211	61	32	93	126	85	108	9	25	41	132	63	37	43	82	47	60	88	76	43	56	51	55	68	157	57	40	42	25	35	24	17	46	83	51	26	10	15	125	58	86	13
GZMK	NM_002104.2	Endogenous	90	122	12	189	61	759	213	48	602	111	270	373	15	74	71	282	204	34	108	104	54	63	271	196	150	582	91	199	112	307	175	34	34	37	239	25	9	26	203	205	43	59	42	744	367	191	43
GZMM	NM_005317.2	Endogenous	15	28	14	30	22	63	64	17	51	26	54	22	6	28	18	42	83	24	36	22	30	32	47	55	23	134	21	34	18	53	42	20	21	26	77	19	15	43	34	19	30	15	12	54	90	41	12
HAMP	NM_021175.2	Endogenous	29	34	10	21	10	40	25	40	17	26	86	3	4	14	16	96	23	31	27	37	21	2330	61	15	30	26	8	51	52	24	12	14	33	43	74	23	21	18	174	52	8	18	6	25	66	12	11
HAVCR2	NM_032782.3	Endogenous	256	287	24	112	361	540	198	119	674	451	323	49	18	156	68	526	96	349	155	145	238	613	326	139	326	312	117	144	154	256	130	125	229	145	333	30	39	69	648	314	73	55	43	396	264	217	42
HCK	NM_002110.2	Endogenous	658	576	200	336	903	950	684	212	1896	467	875	120	42	441	212	1158	169	379	452	403	666	928	507	965	537	556	220	829	469	416	693	414	1669	303	1001	71	209	1871	802	402	130	116	187	936	613	335	88
HLA-A	NM_002116.5	Endogenous	7052	20079	2759	5124	17319	16948	20245	6392	16226	18727	24797	3407	1013	6797	5715	15693	17072	12197	17993	11098	6293	24204	38341	13111	9283	18756	1420	9882	8330	12919	9595	9479	29879	12128	17750	3308	4723	7256	16783	6724	10846	6637	11002	13902	20373	10468	2638
HLA-B	NM_005514.6	Endogenous	5350	20834	3349	4567	17019	19344	20442	3742	12803	14635	19141	3629	881	6325	5452	14896	12121	5726	13245	6460	5854	19353	37108	14300	8281	17535	1545	8799	6170	14118	8676	8906	17473	10160	18351	2707	3173	6228	13681	7246	5263	3701	10391	12641	15049	9476	933
HLA-C	NM_002117.4	Endogenous	5021	13328	1215	4880	7312	19208	12678	2312	7033	7515	10557	2607	492	4666	2382	10562	4510	4413	7523	4776	2396	18495	13130	9072	4764	11088	912	7804	3170	6112	5295	4289	6128	6064	7097	1712	1952	3306	7541	3386	2398	3743	4002	6795	9486	6333	867
HLA-DMA	NM_006120.3	Endogenous	808	983	143	705	876	2419	1097	699	3311	2380	1535	442	107	584	455	2711	811	776	2025	2721	835	3788	1607	1763	1712	2204	167	1016	813	1184	1279	429	350	1024	3941	166	181	468	1404	833	676	376	416	1874	2257	1149	197
HLA-DMB	NM_002118.3	Endogenous	692	734	108	492	810	2064	698	378	2830	2191	989	281	76	490	221	2124	469	795	946	1169	621	2349	894	724	936	2499	132	523	402	858	756	340	330	580	2898	59	90	308	1062	1035	386	299	341	1851	1324	799	162
HLA-DOB	NM_002120.3	Endogenous	203	232	34	393	126	637	153	64	948	449	137	63	27	113	123	507	352	93	380	211	74	628	430	232	113	1532	56	194	155	276	152	85	174	198	849	95	75	116	255	336	113	110	64	122	455	96	35
HLA-DPA1	NM_033554.2	Endogenous	3387	3691	569	2857	3587	8478	3328	1611	11193	10536	4314	1308	299	2993	510	8638	1599	3561	1882	2194	3317	10147	3796	2138	4516	8338	1081	1567	1806	4448	3153	1479	1075	1751	11977	100	228	1157	3910	4597	2722	1070	1224	6240	5673	3447	633
HLA-DPB1	NM_002121.4	Endogenous	3330	2874	485	3118	3298	9738	1980	1452	9237	10156	4070	1311	312	2548	492	11604	1537	3551	3003	2372	2706	7293	2712	2003	5198	7644	871	1592	1386	2479	3459	1288	1280	1676	10028	98	215	1159	4026	4029	2023	872	1004	4675	3730	2384	425
HLA-DQA1	NM_002122.3	Endogenous	2780	2581	385	13	10239	42	2644	1778	20	7444	13	9	143	2754	7	7940	16	1575	3016	19	17	10198	29	9574	20	7889	5	17	2165	14	2222	1306	1145	3792	20835	278	44	1093	8005	11	1099	871	7	18	6	8	424
HLA-DQB1	NM_002123.3	Endogenous	323	1084	81	23	687	37	763	465	10	623	18	12	32	388	17	922	24	302	705	31	19	1506	44	1507	27	1662	9	32	671	14	825	316	308	691	3553	68	32	521	1564	12	115	134	4	7	7	8	130
HLA-DRA	NM_019111.3	Endogenous	7617	8498	1497	5379	11883	24765	6449	4288	28567	25024	11267	2519	568	6211	1402	28239	4428	8169	7122	12815	9878	27198	8759	25269	12575	17113	2354	5306	3742	7859	7961	3304	4047	5733	20919	705	1269	2893	13845	10758	3860	2374	2380	14440	12711	9866	1065
HLA-DRB3	NM_022555.3	Endogenous	5966	8272	1130	4523	6608	10507	7673	3430	15772	15095	14039	2583	634	4393	2997	13176	4707	3612	12856	9732	5751	21099	11868	18070	17606	10184	926	9716	5145	7527	12430	3563	1749	8440	31085	1048	2401	3250	9210	4352	3508	2430	3269	12840	19484	7688	1131
HLA-DRB4	NM_021983.4	Endogenous	13	11	12	856	9	2121	931	12	7348	3672	1440	10	29	9	594	3043	1213	730	1365	22	2224	3878	1333	2770	10	14	212	14	8	1854	7	605	333	20	29	96	174	14	16	1105	768	234	645	1329	6	1585	5
HLA-E	NM_005516.4	Endogenous	3522	8142	2704	3579	5515	8213	5633	2639	6136	4195	6500	1739	705	2267	1988	6049	5589	4954	8165	5366	2641	7491	7983	3430	4513	8583	736	3648	5154	4546	5310	4064	4888	4230	6307	3154	1682	4308	4770	3990	3932	2383	2981	4950	11087	5213	1038
HLA-G	NM_002127.4	Endogenous	709	2321	303	903	2907	2932	1707	531	1513	1991	1211	379	117	733	200	2877	2014	2281	2554	1556	385	1409	5364	767	1600	2957	278	1255	700	703	1225	965	4388	1079	1705	146	210	1178	2748	904	1576	633	572	758	1382	889	422
HMGB1	NM_002128.4	Endogenous	3302	2975	184	2011	2461	4109	1951	2228	2712	2499	1095	673	237	1755	719	2867	1688	4988	3046	2200	1347	4394	7387	1901	2037	5811	591	7347	5466	2800	2495	3155	5782	2543	1513	2447	2834	7788	10513	1870	6304	2011	2311	1903	2862	4016	1646
HRAS	NM_005343.2	Endogenous	268	317	48	165	99	260	144	193	103	92	51	61	25	153	75	162	88	336	184	143	109	167	200	159	113	143	24	588	364	231	181	267	516	154	99	353	348	345	500	110	169	55	144	122	105	160	71
HSD11B1	NM_181755.1	Endogenous	45	117	18	27	255	66	87	47	48	54	184	32	19	65	61	59	104	49	80	48	55	876	138	66	54	38	43	114	115	77	143	124	50	91	48	25	37	22	63	111	17	17	21	280	93	32	19
ICAM1	NM_000201.2	Endogenous	527	1095	273	879	2319	9113	3146	901	2789	1127	6350	139	122	3653	376	2298	684	11715	1277	941	968	10593	1047	4145	2085	601	228	945	1487	768	715	876	354	488	4090	152	116	473	673	1128	1009	670	347	4498	1897	1183	249
ICAM2	NM_000873.3	Endogenous	101	222	15	196	289	719	194	247	413	150	146	57	54	164	86	268	271	272	171	239	364	274	114	257	320	514	16	111	119	150	376	412	100	258	308	82	71	108	164	175	110	77	157	153	328	104	48
ICAM3	NM_002162.3	Endogenous	121	364	101	325	183	934	360	220	756	291	312	154	43	180	292	580	249	391	553	445	428	476	313	451	202	869	122	318	302	375	330	181	119	206	869	207	121	193	289	328	239	181	205	280	656	347	130
ICAM4	NM_001039132.1	Endogenous	28	46	24	58	33	930	133	51	90	25	844	45	24	81	25	189	57	663	83	82	53	173	62	84	98	26	16	40	78	26	63	74	38	56	352	35	29	34	50	45	24	11	28	109	111	27	9
ICOS	NM_012092.2	Endogenous	45	80	13	41	43	230	112	24	171	89	95	12	10	67	34	123	73	28	130	67	31	71	143	94	84	319	32	79	78	174	64	26	44	88	327	49	33	45	54	67	23	36	24	144	157	73	23
ICOSLG	NM_015259.4	Endogenous	174	219	17	268	297	248	253	358	279	214	204	142	43	127	93	256	160	236	339	155	257	269	200	222	189	336	33	148	141	404	202	212	197	163	372	167	134	574	320	92	66	31	79	135	280	113	24
IDO1	NM_002164.3	Endogenous	58	160	120	62	3862	263	715	296	116	820	3613	436	40	133	117	171	319	62	2044	155	81	308	654	505	219	382	154	163	4900	1825	153	130	86	154	1088	577	53	81	47	1946	43	43	18	311	261	343	18
IFI16	NM_005531.1	Endogenous	3084	4096	241	1510	1639	2116	2644	893	1425	1376	973	582	182	613	338	3092	906	1748	1590	541	729	2818	912	1501	1712	2113	251	3223	6219	2769	2389	2019	2409	1886	1535	2705	1370	3225	2799	1551	2760	3802	1806	4444	3217	3591	448
IFI27	NM_005532.3	Endogenous	4070	9673	859	687	7874	7414	15600	1080	2865	3750	3101	457	216	2307	185	3059	2088	3904	1102	1164	4390	20384	1998	4389	2084	10111	168	656	5441	7234	4855	7038	3776	1961	6158	536	4914	5306	23487	3726	2650	142	786	823	2510	6889	207
IFI35	NM_005533.3	Endogenous	258	485	59	159	644	704	541	230	350	539	263	127	34	190	115	433	249	516	375	190	144	1131	750	313	255	540	136	253	376	409	304	449	990	313	363	157	190	148	736	221	334	131	105	527	359	471	84
IFIH1	NM_022168.2	Endogenous	272	445	64	213	1226	587	592	143	294	213	184	127	26	300	77	383	191	435	365	170	216	816	580	328	165	481	239	210	271	511	293	368	471	366	747	213	203	189	781	280	316	77	63	346	462	278	102
IFIT1	NM_001548.3	Endogenous	273	749	24	138	1823	602	1192	101	444	256	74	79	44	334	36	317	224	1200	190	121	172	3263	262	154	165	595	247	50	380	419	264	596	165	222	837	161	254	114	803	108	134	109	71	353	791	118	64
IFIT2	NM_001547.4	Endogenous	206	252	39	52	1636	733	380	123	312	103	95	85	43	146	38	300	64	975	197	213	266	1744	195	147	91	348	110	72	115	165	247	322	172	111	274	111	142	117	510	84	246	75	89	206	862	199	33
IFITM1	NM_003641.3	Endogenous	1878	4035	415	2399	14315	4107	4842	3357	5812	6563	971	987	448	4491	387	5664	2465	5048	765	1489	1877	3302	1579	3937	3977	4856	697	1072	7498	5324	6591	5821	2366	2870	4261	7566	1865	1987	11156	3304	1771	307	646	1369	4228	3458	253
IFITM2	NM_006435.2	Endogenous	2283	3844	832	2241	1751	3237	2888	2925	1849	2551	2277	579	329	2507	867	5280	2558	3809	2130	2519	2436	2621	2933	2602	4345	2590	452	1325	3741	1137	3856	4063	909	2366	2489	519	659	998	3587	2192	3775	1147	1643	954	2036	3300	335
IFNA1	NM_024013.1	Endogenous	15	14	2	13	7	21	19	8	17	7	9	3	5	6	5	12	12	13	17	9	13	17	8	18	8	12	3	5	8	8	8	12	8	8	11	8	7	13	14	10	5	4	4	6	12	8	5
IFNA17	NM_021268.2	Endogenous	14	11	7	13	10	17	17	11	22	14	11	9	6	9	4	15	9	15	15	18	15	23	13	10	12	19	12	9	12	10	9	20	7	16	19	9	7	19	14	17	13	6	5	4	5	8	9
IFNA2	NM_000605.3	Endogenous	20	9	7	11	8	22	6	7	15	9	18	4	7	9	15	26	15	18	27	14	13	25	22	14	19	18	7	22	17	9	9	16	18	14	21	11	15	17	22	11	5	4	14	9	14	9	12
IFNA7	NM_021057.2	Endogenous	16	12	17	21	20	26	16	16	25	12	21	7	14	12	8	26	11	25	25	33	28	51	29	32	14	15	10	20	18	11	23	16	16	31	32	25	20	19	23	16	7	15	9	14	23	10	7
IFNA8	NM_002170.3	Endogenous	8	11	4	9	10	12	10	4	7	8	4	2	7	3	7	18	12	21	16	11	10	25	8	6	12	6	4	11	10	9	12	13	9	11	16	8	6	10	8	5	6	7	1	4	11	4	5
IFNAR1	NM_000629.2	Endogenous	124	257	30	131	168	310	290	158	365	168	107	109	29	142	81	328	210	384	205	303	160	483	236	112	181	287	39	249	153	133	318	187	497	247	276	119	110	654	255	172	275	168	234	184	384	207	52
IFNAR2	NM_000874.3	Endogenous	540	1315	60	735	1067	1761	2199	1818	2109	1198	762	447	117	1127	815	1842	1007	3059	1586	1120	813	1837	792	1752	872	1437	293	836	974	898	1403	809	1043	818	1547	672	357	728	522	834	999	414	607	1070	1487	707	224
IFNB1	NM_002176.2	Endogenous	8	24	7	12	22	25	16	12	11	10	9	6	4	7	9	43	14	40	24	16	13	16	17	13	15	14	8	17	15	15	12	23	21	10	14	8	10	14	13	6	4	2	5	7	11	7	6
IFNG	NM_000619.2	Endogenous	18	22	25	28	62	104	23	16	40	91	22	49	10	24	35	43	34	26	27	47	27	40	85	22	32	46	29	38	37	50	24	16	37	26	26	13	27	22	22	21	9	8	8	85	31	42	10
IFNGR1	NM_000416.1	Endogenous	1736	3762	213	1525	1886	1952	2051	1446	2869	3895	1374	457	225	1251	415	1719	1210	1573	3034	829	1007	2072	995	1353	1096	2268	182	1913	2894	1413	2033	1086	1118	1659	1535	1567	1209	1965	3906	1283	1304	331	716	1290	1629	741	247
IFNL1	NM_172140.1	Endogenous	45	52	75	43	53	49	60	45	39	35	37	29	38	42	44	57	82	65	61	91	63	84	88	91	59	43	31	60	38	33	44	60	69	114	90	79	98	62	97	36	16	12	17	24	54	41	36
IFNL2	NM_172138.1	Endogenous	17	17	16	20	19	30	20	13	13	11	16	7	7	7	9	21	25	29	29	11	10	29	20	14	9	50	8	19	22	16	17	17	27	30	19	28	15	23	38	11	6	4	6	6	16	10	10
IGF1R	NM_000875.2	Endogenous	2841	4503	108	1134	915	930	1535	1975	673	1044	583	838	140	1169	241	1483	1304	2860	2839	2337	1112	1756	2837	1371	977	695	520	4608	1896	1274	2058	1290	3708	4187	639	2030	2877	2423	5419	1120	1476	2081	1090	2191	2277	848	781
IGF2R	NM_000876.1	Endogenous	1392	1265	69	515	757	1104	701	1260	1371	591	508	218	95	730	278	766	556	1097	1237	582	685	1129	2300	641	642	1009	140	1445	1230	720	608	1159	1004	923	478	549	1128	1001	1588	638	1221	415	964	1755	1147	715	349
IGLL1	NM_020070.2	Endogenous	12	10	21	19	14	20	16	12	18	12	15	5	9	6	8	16	9	24	9	16	18	20	32	17	11	11	5	14	11	13	16	15	24	11	19	15	20	12	13	4	16	1	6	14	20	6	6
IKBKB	NM_001556.1	Endogenous	671	490	63	443	504	609	781	852	415	312	341	251	92	214	119	817	473	1331	2549	1120	1108	2169	436	856	628	579	78	939	1927	510	807	488	1822	879	840	654	834	548	432	352	530	298	276	394	512	490	194
IKBKE	NM_014002.2	Endogenous	443	471	54	211	647	706	438	194	495	215	234	215	17	277	126	355	192	593	942	349	297	666	418	739	312	908	103	491	354	1468	382	303	492	565	732	1073	544	1064	470	254	338	266	211	459	379	277	93
IKBKG	NM_003639.2	Endogenous	665	546	37	335	596	690	530	661	471	396	479	131	49	240	278	477	315	828	1498	556	314	704	774	497	389	1050	93	976	422	564	424	952	720	1079	754	430	860	951	1073	295	456	234	334	607	506	392	121
IL10	NM_000572.2	Endogenous	34	85	18	45	44	84	35	20	42	52	47	13	10	36	12	49	31	46	48	34	44	83	54	39	77	41	20	46	23	37	33	49	39	32	50	21	42	40	112	43	15	7	15	49	34	22	11
IL10RA	NM_001558.2	Endogenous	369	561	42	499	531	1195	443	272	1359	623	600	195	49	315	370	918	373	434	739	400	413	737	657	700	497	956	233	556	364	677	622	256	165	474	1179	124	83	188	556	425	207	162	172	1142	1231	413	108
IL11	NM_000641.2	Endogenous	150	244	7	28	52	63	95	41	28	49	772	7	20	44	81	89	136	46	40	28	660	120	45	34	29	24	10	111	78	52	50	731	38	63	18	340	98	76	101	35	15	7	12	11	23	17	12
IL11RA	NM_147162.1	Endogenous	94	166	18	153	102	169	148	107	126	58	60	57	40	69	38	176	100	136	135	153	82	130	229	240	189	132	40	163	71	282	102	175	106	160	268	52	153	101	163	55	163	175	278	134	551	91	10
IL12A	NM_000882.2	Endogenous	30	44	18	42	48	54	63	45	39	74	50	24	11	22	27	30	36	54	75	53	38	114	39	30	27	75	22	35	57	53	43	31	141	56	38	19	35	35	52	27	17	15	11	17	38	25	8
IL12B	NM_002187.2	Endogenous	20	17	13	23	14	55	21	18	29	16	19	8	10	13	13	36	20	35	40	24	27	55	24	25	21	32	10	30	24	24	25	21	35	28	52	26	24	29	40	18	19	8	6	15	24	12	7
IL12RB1	NM_005535.1	Endogenous	50	76	27	71	68	190	108	43	155	286	140	60	19	62	95	110	70	48	84	93	68	133	163	175	99	261	57	101	51	207	100	74	61	94	331	29	36	53	80	85	165	32	49	126	192	160	22
IL12RB2	NM_001559.2	Endogenous	49	239	55	43	43	163	38	82	46	131	148	14	17	27	28	33	42	30	38	33	58	99	111	58	44	88	16	62	42	102	72	28	63	46	52	52	21	39	86	215	297	207	13	101	47	905	184
IL13	NM_002188.2	Endogenous	14	21	29	28	21	36	21	19	21	20	24	17	19	16	25	16	28	24	28	35	27	29	32	23	18	27	16	38	17	21	25	25	33	31	36	30	39	57	32	7	11	3	9	4	25	20	10
IL13RA1	NM_001560.2	Endogenous	1410	2872	272	1731	1495	3626	2575	3073	1684	1517	1006	457	198	2089	553	2719	1581	3819	7915	1477	1908	2977	1134	1122	1715	2604	188	3772	3991	1357	1967	1240	1098	1781	2079	1193	946	1687	2622	2482	1152	682	840	812	1799	903	208
IL13RA2	NM_000640.2	Endogenous	20	42	4	29	14	13	33	16	9	7	18	9	6	9	17	27	37	35	29	21	11	28	23	17	29	285	5	17	17	14	47	17	17	16	61	10	15	19	69	25	11	12	18	6	23	13	3
IL15	NM_172174.1	Endogenous	79	128	26	59	148	186	147	69	174	242	112	35	25	83	39	182	102	111	148	77	103	196	115	126	165	127	16	143	87	106	133	120	384	131	235	105	86	99	158	85	86	30	34	79	125	55	19
IL15RA	NM_002189.2	Endogenous	275	481	41	195	722	464	437	234	329	722	433	124	41	225	154	396	370	297	540	229	297	949	459	646	250	410	73	375	749	522	504	346	623	380	388	416	158	290	218	360	95	40	65	264	426	146	20
IL16	NM_004513.4	Endogenous	323	519	26	434	182	1038	350	301	1134	298	197	249	38	202	168	919	466	280	562	393	206	246	345	565	339	1600	47	327	178	362	555	177	63	378	1268	118	127	189	315	369	1634	292	400	578	1158	556	1186
IL17A	NM_002190.2	Endogenous	10	6	16	26	8	24	7	12	13	6	14	2	12	10	16	1	9	21	9	12	11	22	7	11	7	10	4	7	15	14	7	6	19	16	17	14	12	31	17	15	3	1	4	1	11	7	6
IL17B	NM_014443.2	Endogenous	11	14	2	10	13	24	10	6	9	9	4	5	6	7	6	16	4	16	15	11	11	17	16	15	9	9	5	13	17	17	9	22	28	14	13	12	11	10	20	4	11	4	10	2	8	12	3
IL17F	NM_052872.3	Endogenous	20	10	11	14	29	24	19	19	22	9	14	8	6	8	6	22	17	17	16	17	8	45	24	21	14	13	5	25	60	20	16	36	25	21	20	9	17	18	61	12	5	6	7	11	11	16	13
IL17RA	NM_014339.6	Endogenous	340	416	63	212	321	589	303	283	639	358	258	92	29	260	119	581	285	623	465	401	377	592	328	371	306	362	96	735	465	204	401	228	488	472	520	322	365	969	795	284	331	98	203	430	403	204	59
IL17RB	NM_018725.3	Endogenous	26	20	13	40	671	107	81	73	177	45	163	24	13	42	56	215	37	140	227	152	35	233	486	178	119	29	6	41	50	31	53	16	60	46	70	30	29	34	50	20	7	6	35	10	37	10	4
IL18	NM_001562.2	Endogenous	286	635	24	200	229	330	151	65	439	234	134	161	21	104	34	325	155	116	313	221	172	691	249	293	121	385	22	261	199	150	307	60	138	174	462	1340	114	731	1141	253	125	49	183	720	294	94	11
IL18R1	NM_003855.2	Endogenous	72	183	14	207	73	179	114	82	139	89	218	76	21	78	47	186	104	42	167	51	51	97	48	53	38	188	16	118	154	221	300	58	74	118	158	67	72	109	190	84	134	16	23	68	127	57	18
IL18RAP	NM_003853.2	Endogenous	28	150	34	45	59	43	68	29	40	36	353	45	10	28	49	41	67	28	103	47	25	37	47	64	22	70	26	43	40	114	76	35	32	43	50	13	13	59	62	44	15	15	19	81	81	29	11
IL19	NM_013371.3	Endogenous	22	40	838	45	15	29	25	14	16	15	12	12	5	18	23	50	23	44	31	14	17	20	17	43	19	19	10	12	12	41	16	29	22	30	13	25	31	72	23	14	7	10	4	8	16	16	5
IL1A	NM_000575.3	Endogenous	62	555	233	285	25	40	63	18	96	14	44	7	33	50	11	59	25	38	37	20	8	46	17	93	23	56	9	63	211	26	46	77	40	75	35	402	27	251	236	849	7	4	17	12	8	5	3
IL1B	NM_000576.2	Endogenous	55	560	1296	1259	340	96	267	41	159	86	379	16	132	125	36	107	31	86	70	33	32	226	131	408	96	120	49	78	76	92	141	630	111	71	275	31	32	144	179	516	15	8	83	92	94	22	23
IL1R1	NM_000877.2	Endogenous	807	1471	41	857	501	1569	929	1575	895	460	1464	318	162	967	481	1884	909	953	909	1319	511	963	371	623	772	432	25	833	975	850	1522	1047	450	695	983	583	562	391	716	1019	314	106	410	342	1052	505	64
IL1R2	NM_173343.1	Endogenous	57	368	238	162	234	56	44	54	77	22	338	37	13	31	36	33	30	29	129	45	23	75	26	23	22	46	38	55	88	295	483	107	32	700	42	24	204	67	285	48	26	16	46	32	28	23	9
IL1RAP	NM_002182.2	Endogenous	685	2284	91	638	403	868	799	1670	413	223	764	205	38	1820	239	907	919	1280	2729	287	668	869	157	540	401	259	34	1309	2343	530	741	815	1660	303	375	2284	441	2540	1768	902	1647	3193	108	724	1110	262	280
IL1RAPL2	NM_017416.1	Endogenous	17	25	15	34	66	60	43	28	22	28	26	16	8	15	27	52	35	39	90	42	49	41	47	28	26	28	5	48	53	23	27	20	53	36	43	64	28	52	66	40	24	13	9	26	45	16	20
IL1RL1	NM_016232.4	Endogenous	68	136	21	234	36	99	50	71	86	36	269	79	27	63	33	132	186	66	238	56	68	143	44	44	43	52	13	63	674	63	270	20	25	54	66	30	20	56	72	154	48	15	17	13	119	26	11
IL1RL2	NM_003854.2	Endogenous	95	37	18	84	16	97	29	53	24	37	14	8	2	28	11	30	22	44	46	36	16	47	13	21	19	48	2	103	72	29	19	11	46	46	31	41	44	72	37	36	8	3	11	3	10	8	2
IL1RN	NM_000577.3	Endogenous	193	480	2065	1953	133	98	124	22	121	48	224	24	26	56	50	48	48	57	101	53	92	166	80	300	65	49	94	138	268	537	165	246	23	620	60	2170	348	4640	560	773	31	15	248	66	39	59	29
IL2	NM_000586.2	Endogenous	6	17	5	12	9	26	14	11	21	13	11	4	6	7	5	10	14	11	13	19	11	21	21	18	18	21	2	8	7	7	6	12	16	20	14	15	7	8	9	8	4	6	1	8	12	9	8
IL21	NM_021803.2	Endogenous	10	17	19	14	22	40	17	14	20	22	12	11	3	15	18	21	11	22	33	23	15	14	30	21	24	123	13	23	17	34	9	18	21	24	27	9	6	13	21	16	7	10	10	33	24	16	6
IL21R	NM_021798.2	Endogenous	48	79	11	36	83	170	139	54	180	143	81	25	7	106	73	163	68	63	113	57	46	105	186	119	60	373	28	129	63	187	72	28	43	68	288	23	32	29	72	104	28	27	14	191	167	80	7
IL22	NM_020525.4	Endogenous	12	8	37	29	12	20	11	18	12	9	16	9	8	6	18	25	18	26	21	23	12	22	21	23	22	19	5	17	17	15	10	17	24	23	9	15	18	20	21	17	6	10	11	9	12	8	5
IL22RA1	NM_021258.2	Endogenous	59	91	53	33	35	26	44	28	19	22	22	32	5	20	12	30	25	79	17	27	25	70	162	21	16	19	5	61	62	50	48	22	135	92	27	53	78	189	92	18	67	4	38	6	12	11	5
IL22RA2	NM_181310.1	Endogenous	10	21	11	20	9	25	24	15	54	23	18	3	8	54	14	74	20	26	77	44	18	36	30	18	29	227	12	31	19	20	15	19	28	30	53	11	23	24	25	21	13	9	7	5	24	10	8
IL23A	NM_016584.2	Endogenous	64	51	571	68	216	52	112	37	36	20	69	12	9	28	19	37	76	48	29	30	114	290	208	27	22	102	8	81	42	71	29	26	172	55	61	54	37	178	70	13	12	20	10	22	33	12	9
IL23R	NM_144701.2	Endogenous	12	25	11	18	16	22	14	22	23	13	17	10	6	6	11	25	11	25	30	18	13	38	24	20	20	22	3	20	11	12	19	16	15	15	23	10	12	19	23	13	6	6	6	22	14	7	6
IL24	NM_181339.1	Endogenous	17	228	16	19	12	24	26	11	18	23	22	9	6	12	22	20	16	21	12	18	16	17	22	95	18	15	6	15	8	23	46	579	20	28	13	17	20	86	42	14	35	10	11	22	11	9	15
IL25	NM_022789.2	Endogenous	14	17	3	19	19	32	14	6	13	8	11	1	7	8	13	15	16	24	15	10	15	18	15	18	12	12	5	12	8	12	16	9	23	15	21	10	19	22	16	9	5	5	11	6	8	2	5
IL26	NM_018402.1	Endogenous	11	15	41	15	23	23	17	20	19	16	10	10	10	14	13	12	27	24	18	26	17	19	32	30	20	17	11	20	11	24	16	22	23	22	27	24	14	35	18	9	6	7	7	8	20	10	10
IL27	NM_145659.3	Endogenous	7	14	7	6	19	19	14	3	28	14	11	5	4	10	9	16	6	19	14	15	24	52	22	22	11	14	6	12	10	16	12	13	11	10	14	13	9	12	26	7	3	6	7	13	11	16	1
IL2RA	NM_000417.1	Endogenous	286	453	29	65	120	678	199	114	303	204	446	40	22	195	97	429	46	329	247	97	401	684	265	258	167	319	45	276	151	449	216	132	150	225	454	74	53	112	871	242	77	45	105	403	186	206	18
IL2RB	NM_000878.2	Endogenous	117	247	33	124	161	582	541	112	358	325	277	185	20	132	200	288	309	115	250	248	154	314	516	462	178	551	86	279	187	622	362	193	196	226	764	132	82	174	175	165	178	54	61	411	552	315	58
IL2RG	NM_000206.1	Endogenous	245	380	93	375	1206	864	354	216	1160	603	402	189	47	329	200	668	322	241	822	489	220	628	526	599	370	1414	178	344	346	547	412	235	224	336	919	156	115	244	425	548	200	177	156	762	609	344	80
IL3	NM_000588.3	Endogenous	11	12	18	8	16	18	14	15	11	14	9	6	6	10	10	14	10	20	15	16	12	22	24	20	12	14	10	11	5	13	8	8	12	21	12	10	10	13	17	3	4	3	1	8	17	10	15
IL32	NM_001012633.1	Endogenous	22634	18512	4819	20179	25124	25683	19226	26580	15444	13254	17365	11134	6317	13590	18428	25321	39880	24501	33981	43334	23250	25817	37477	31526	40061	19733	5729	29435	15088	13890	20893	28304	35944	46836	29682	35912	38417	29328	27082	12770	7560	7129	5192	6662	14407	11454	20042
IL34	NM_152456.1	Endogenous	42	78	12	163	121	55	43	46	72	21	38	34	20	20	12	87	77	62	91	63	49	44	37	57	92	56	7	41	19	120	143	158	49	183	172	52	44	58	76	26	64	37	39	31	106	42	19
IL3RA	NM_002183.2	Endogenous	39	109	16	82	87	216	79	106	120	81	117	48	34	34	24	134	128	159	119	98	89	93	58	154	195	138	18	66	62	59	180	193	35	152	148	46	51	62	111	57	47	19	18	184	61	45	16
IL4	NM_000589.2	Endogenous	18	13	9	4	15	25	12	18	20	13	15	13	5	15	12	25	15	15	15	28	14	30	11	17	20	13	6	17	11	9	15	18	14	18	32	12	14	24	24	5	12	2	2	9	16	4	11
IL4R	NM_000418.2	Endogenous	551	1612	216	621	725	909	867	1060	942	558	847	210	62	501	322	1214	875	1640	2712	620	699	1597	486	1188	581	881	61	560	3039	523	1117	740	228	641	1122	1820	311	1670	711	618	294	92	181	326	461	306	54
IL5	NM_000879.2	Endogenous	5	13	3	14	7	9	13	11	8	2	12	2	8	8	6	10	4	13	8	5	7	16	5	9	8	13	2	13	16	13	6	9	20	12	10	9	14	16	7	3	3	8	4	2	9	3	5
IL5RA	NM_000564.3	Endogenous	40	42	14	52	42	79	56	151	54	34	29	225	14	36	27	61	46	71	69	145	44	72	49	79	50	65	12	57	45	42	350	74	53	183	46	59	68	121	62	28	25	23	24	30	47	37	17
IL6	NM_000600.1	Endogenous	129	488	11	817	153	64	150	251	42	97	1983	12	22	102	76	95	110	103	101	33	40	174	271	54	678	37	12	1046	356	250	166	1052	44	43	46	19	18	16	156	154	25	25	11	85	210	20	8
IL6R	NM_000565.2	Endogenous	223	402	32	366	187	416	241	530	561	416	434	179	50	269	141	322	330	391	643	594	506	802	217	628	329	586	62	240	363	265	364	131	103	521	740	491	143	381	378	284	1182	749	196	347	367	329	248
IL6ST	NM_002184.2	Endogenous	1683	3524	298	3878	2293	4314	2697	7339	4924	1864	2792	1188	754	2269	1451	5035	2823	6933	4332	6481	2266	5885	2120	4901	3555	6032	273	1657	2200	2090	4830	2541	1247	3122	4071	1876	1269	2921	3413	2538	1844	1825	1968	2755	5702	3313	911
IL7	NM_000880.2	Endogenous	29	39	9	23	86	79	49	29	63	45	34	36	12	25	14	91	46	21	51	56	28	48	29	62	23	107	3	36	43	25	59	26	60	40	74	46	27	37	50	19	66	19	10	17	44	23	11
IL7R	NM_002185.2	Endogenous	391	798	70	488	318	1310	728	148	1368	216	1246	121	18	455	153	538	508	220	965	373	140	488	279	314	375	1096	148	574	208	644	392	552	42	343	1102	136	279	248	1435	593	88	276	91	588	995	290	52
IL8	NM_000584.2	Endogenous	659	3138	2565	15833	4358	341	2951	1047	881	569	6404	243	1028	5586	3588	309	858	461	4921	366	287	575	1250	1251	807	648	301	924	22239	1918	2274	7003	782	594	67	9440	229	1364	1743	1892	171	309	403	306	219	188	175
IL9	NM_000590.1	Endogenous	10	4	5	15	18	22	13	11	8	11	10	5	8	7	9	19	14	21	18	16	9	20	19	13	18	6	2	20	14	13	5	19	12	16	17	14	16	22	15	2	8	4	4	8	12	10	2
ILF3	NM_001137673.1	Endogenous	5216	3441	209	2460	2531	4758	2924	2931	2912	2467	1986	1014	243	1690	1246	3251	1953	6453	4482	4238	2559	3701	6388	3242	2081	3174	895	8915	7718	1905	2920	3478	13805	4331	3080	4780	8033	4796	7797	1929	4452	1956	2600	2563	3562	4476	1377
INPP5D	NM_005541.3	Endogenous	386	452	70	655	397	880	448	407	992	395	473	213	50	587	209	667	585	491	685	390	562	686	428	322	526	1962	112	391	519	486	505	369	401	407	952	216	160	357	602	441	252	189	209	553	710	338	81
IRAK1	NM_001569.3	Endogenous	1391	1162	121	657	2642	3126	1058	1143	1141	2621	1031	236	81	901	592	1178	1089	2176	1799	2039	2659	1627	1915	810	899	1404	177	1926	1837	974	690	1391	2631	2777	1845	929	1951	2946	3281	786	1009	508	346	1259	750	643	362
IRAK2	NM_001570.3	Endogenous	69	171	157	261	284	212	284	288	176	194	328	42	22	161	50	140	213	98	321	105	214	620	148	121	160	153	26	130	348	198	178	143	75	143	332	417	54	233	194	159	58	25	17	88	107	50	14
IRAK4	NM_016123.1	Endogenous	301	349	26	174	178	428	340	131	327	162	163	115	21	162	159	340	137	449	504	222	130	253	380	155	217	489	48	717	277	319	346	206	855	510	407	235	372	480	559	164	626	190	347	334	464	281	91
IRF1	NM_002198.1	Endogenous	184	460	306	475	917	610	590	302	364	1594	918	264	25	316	235	482	472	358	455	419	254	624	978	1001	365	839	238	433	570	1047	517	395	271	444	599	372	274	424	262	498	154	59	126	616	538	317	50
IRF2	NM_002199.3	Endogenous	509	552	73	330	473	670	351	431	669	761	167	244	77	314	106	601	246	755	461	392	389	737	518	419	419	964	140	657	1164	476	581	440	1417	592	528	546	389	588	626	511	539	208	166	374	386	292	122
IRF3	NM_001571.5	Endogenous	336	215	36	135	238	371	239	193	312	166	164	95	21	129	234	248	223	401	389	416	343	530	388	312	253	209	34	533	482	332	221	211	182	451	571	319	507	501	415	125	321	162	221	280	445	303	78
IRF4	NM_002460.1	Endogenous	64	203	49	252	90	907	319	243	823	362	319	319	23	291	479	625	442	53	422	471	41	111	711	939	167	639	133	437	214	565	366	210	27	1089	578	560	157	114	48	546	1413	1383	3671	408	3236	2818	703
IRF5	NM_002200.3	Endogenous	192	121	21	87	175	518	199	73	372	138	116	54	15	113	107	231	92	432	236	141	292	302	168	306	131	235	23	684	243	152	112	185	625	180	331	254	234	481	207	134	150	40	59	162	193	104	24
IRF7	NM_001572.3	Endogenous	309	561	114	228	848	736	914	758	715	445	323	122	26	508	140	612	428	1193	536	496	660	2951	984	995	327	662	127	317	220	445	278	584	321	342	1168	356	448	125	1013	152	202	115	184	291	1052	265	79
IRF8	NM_002163.2	Endogenous	309	285	45	319	479	965	294	226	1173	500	327	117	45	195	110	725	243	260	833	275	277	456	436	475	417	2242	151	304	276	479	340	242	173	261	1490	54	73	144	278	357	183	178	187	534	611	274	205
IRGM	NM_001145805.1	Endogenous	16	17	4	21	15	44	25	9	23	24	33	9	7	12	9	22	45	21	41	29	17	55	29	20	19	25	9	6	14	20	25	9	20	22	69	14	15	24	21	21	12	7	7	23	27	20	6
ISG15	NM_005101.3	Endogenous	649	1428	144	150	3233	951	3239	420	1138	631	368	104	28	557	164	453	507	1889	462	196	935	2651	1722	378	268	1212	608	224	1008	872	357	1564	607	295	1826	387	590	354	1739	531	160	85	58	526	788	790	60
ISG20	NM_002201.4	Endogenous	175	370	200	386	434	790	605	2786	499	256	551	144	26	162	391	235	242	265	499	1180	125	402	854	442	197	812	124	392	276	766	271	252	366	346	445	489	222	312	406	211	820	532	65	320	748	118	52
ITCH	NM_001257138.1	Endogenous	1890	1897	113	1069	1597	2811	1449	2308	1696	1617	836	407	138	1255	559	1853	950	3438	2763	1425	1037	3085	2067	1277	895	1994	529	2041	4205	801	1540	1175	2816	1326	1077	2016	1254	1808	2730	1761	1621	574	956	894	1220	974	375
ITGA1	NM_181501.1	Endogenous	1258	1702	26	566	621	2601	1528	1516	1165	858	545	318	149	1204	276	3979	1646	2374	1794	1535	1474	1608	4539	2608	1331	661	59	892	991	550	1055	3025	2503	1072	1375	462	693	1089	1485	1214	880	157	503	247	1102	335	385
ITGA2	NM_002203.2	Endogenous	987	1651	168	622	276	2701	1412	272	1365	355	481	470	30	3913	111	684	786	11251	1551	451	2277	952	654	2352	404	2103	9	2196	2812	1152	1688	581	2738	2474	393	2510	1227	2339	2408	1203	122	107	81	98	496	103	15
ITGA2B	NM_000419.3	Endogenous	116	106	24	79	145	245	85	93	82	83	91	27	43	70	38	100	101	249	119	86	42	179	104	88	81	98	37	144	181	72	121	135	184	77	73	102	71	114	150	59	59	34	51	86	100	59	16
ITGA4	NM_000885.4	Endogenous	201	231	17	229	176	531	508	238	383	298	330	165	25	224	133	546	374	526	393	323	271	509	445	385	287	565	85	735	303	387	363	441	219	213	659	174	91	182	362	285	148	75	139	385	475	237	66
ITGA5	NM_002205.2	Endogenous	1585	3244	16	1153	1804	1837	779	1157	988	1817	986	147	171	738	334	1890	1285	2776	1089	414	1461	1273	778	822	1472	336	118	1610	1267	549	1329	3058	1033	972	431	1492	835	1344	2337	1174	1166	79	210	293	423	634	42
ITGA6	NM_000210.1	Endogenous	2488	6888	94	1304	191	741	571	346	734	278	309	228	123	98	154	451	464	373	370	362	266	723	2146	250	896	301	20	4572	1638	1481	1695	743	5867	1994	317	1417	905	4210	8123	958	1169	100	800	1187	1664	344	164
ITGAE	NM_002208.4	Endogenous	332	301	38	147	196	480	142	153	312	379	106	84	56	141	63	272	142	306	190	217	162	295	365	123	189	334	39	516	520	280	248	159	973	223	167	185	156	485	397	229	231	92	230	152	218	253	92
ITGAL	NM_002209.2	Endogenous	98	181	70	252	274	885	514	148	1087	349	461	229	21	157	200	555	289	100	694	325	227	339	572	594	217	1369	133	333	200	520	380	135	94	256	1182	51	64	145	256	287	80	144	71	793	760	278	56
ITGAM	NM_000632.3	Endogenous	260	249	11	159	685	690	302	107	890	388	300	67	27	211	53	930	132	404	338	207	535	699	177	463	320	199	82	159	164	122	216	106	186	165	432	48	52	79	361	222	69	80	102	391	236	154	22
ITGAX	NM_000887.3	Endogenous	786	987	227	890	1847	1145	857	543	3176	1090	2010	307	75	796	475	1342	502	925	1633	855	680	1356	1053	1687	1118	2396	357	727	814	773	683	753	554	1131	1389	153	275	427	1207	735	867	327	438	2446	874	745	276
ITGB1	NM_033666.2	Endogenous	10417	15228	300	5276	7777	15600	8894	9553	7694	8976	4453	1276	790	9540	2903	16459	8413	25347	16233	6280	10917	16871	10200	4050	7495	6012	2138	8367	22884	4984	6988	10890	12818	5202	3947	6156	3108	12192	12403	11829	5551	5381	4678	5232	7386	6974	2015
ITGB2	NM_000211.2	Endogenous	650	706	75	666	1184	1778	1099	410	2619	974	1169	286	43	773	338	2090	621	673	739	689	965	1641	939	1202	866	1432	274	780	563	843	590	317	340	816	1660	56	141	249	1452	664	243	239	190	1900	1065	711	220
ITGB3	NM_000212.2	Endogenous	191	292	17	389	233	158	429	200	605	521	106	62	52	579	58	467	552	454	296	86	407	233	103	539	648	69	25	92	768	78	470	425	133	221	116	95	88	97	392	58	227	22	73	252	167	1840	13
ITGB4	NM_001005731.1	Endogenous	3735	6899	339	2196	2121	1198	4051	807	1494	737	1848	1330	187	1716	51	1006	1920	2079	3528	1134	3954	5813	1726	2332	1586	579	12	6329	8990	2938	5052	2517	5569	3655	843	5813	3161	9833	11630	2332	220	34	313	39	938	43	42
ITK	NM_005546.3	Endogenous	65	175	18	184	78	437	208	38	438	132	559	80	9	56	113	161	131	38	196	118	49	85	178	132	71	545	56	116	136	415	115	32	40	77	541	37	21	54	103	150	34	102	35	443	344	208	47
JAK1	NM_002227.1	Endogenous	956	2135	123	1006	980	1917	1465	1014	1477	1026	1170	396	200	701	411	1609	1291	1580	2015	1252	1158	1975	2074	1244	1599	1680	155	1396	1585	1010	1366	1319	1233	1371	1614	1592	1224	1357	1787	1473	1551	810	876	1452	1815	1047	476
JAK2	NM_004972.2	Endogenous	536	816	112	641	1889	1175	1000	1399	1019	1196	546	484	103	570	323	1077	609	648	1359	766	773	695	1190	1171	866	1141	257	916	515	951	1264	939	460	813	1361	552	388	1098	683	804	458	417	682	821	1306	597	147
JAK3	NM_000215.2	Endogenous	142	330	31	252	682	530	345	300	499	296	333	116	17	181	182	415	390	264	417	212	230	212	367	443	275	946	76	347	249	448	414	296	124	301	703	115	70	170	302	275	187	99	62	480	534	275	50
JAM3	NM_032801.3	Endogenous	388	696	10	648	312	513	421	628	390	245	246	187	92	252	150	799	512	879	562	293	322	184	267	272	621	239	239	434	367	203	589	697	236	475	284	149	199	265	508	336	917	74	320	90	677	151	57
KIR3DL1	NM_013289.2	Endogenous	29	19	11	14	21	39	21	22	16	18	19	5	3	16	10	30	26	32	35	18	14	61	27	22	18	16	4	36	36	31	18	28	33	25	18	37	17	33	30	25	10	9	14	13	28	14	7
KIR3DL2	NM_006737.2	Endogenous	12	14	4	8	12	19	8	12	9	9	10	3	9	8	6	25	18	27	21	20	13	18	15	14	14	12	3	22	18	10	7	17	20	18	17	14	19	19	8	6	8	7	7	9	12	13	5
KIR3DL3	NM_153443.3	Endogenous	10	6	14	12	10	23	11	8	10	7	8	6	6	7	14	17	21	12	16	15	12	20	25	16	12	11	4	21	1	17	15	12	17	24	27	12	15	18	19	5	4	2	5	8	12	4	4
KIR_Activating_Subgroup_1	NM_001083539.1	Endogenous	6	18	3	9	10	19	10	10	6	5	11	10	1	8	13	3	15	12	12	23	14	19	6	19	9	12	10	3	13	19	26	18	25	14	9	14	24	22	18	7	7	1	1	2	21	11	1
KIR_Activating_Subgroup_2	NM_014512.1	Endogenous	9	17	8	12	23	26	11	13	7	10	8	9	9	8	15	25	19	35	22	22	23	24	24	23	18	16	5	14	15	15	14	20	18	19	24	14	18	15	22	7	2	5	2	10	12	14	17
KIR_Inhibiting_Subgroup_1	NM_014218.2	Endogenous	60	86	21	68	76	128	79	71	87	80	45	23	14	36	24	78	67	97	91	50	44	105	120	69	80	109	31	113	104	86	58	73	103	90	83	69	69	112	167	59	56	30	42	50	94	74	18
KIR_Inhibiting_Subgroup_2	NM_014511.3	Endogenous	11	21	15	14	21	37	13	10	18	25	10	10	9	12	12	22	18	20	28	14	14	33	36	17	12	11	12	24	16	22	12	14	17	19	25	21	14	25	25	16	10	3	3	14	16	14	4
KIT	NM_000222.2	Endogenous	106	104	23	134	23	72	124	983	111	76	183	98	11	62	585	80	185	150	132	680	27	53	360	46	56	38	4	71	66	51	291	59	316	44	41	22	23	53	58	67	66	11	2462	5	156	1188	350
KLRB1	NM_002258.2	Endogenous	29	103	25	91	22	95	157	68	229	35	137	58	6	42	61	80	100	26	152	91	19	55	159	62	100	205	30	78	64	213	81	36	36	52	408	30	11	82	55	129	15	44	24	229	225	43	25
KLRC1	NM_002259.3	Endogenous	49	88	28	53	56	111	64	49	85	111	67	60	13	34	32	134	187	98	122	76	108	52	104	61	58	118	30	84	72	102	56	43	51	57	95	42	39	65	52	56	30	16	10	98	53	42	15
KLRC2	NM_002260.3	Endogenous	25	72	15	48	45	113	133	43	102	104	122	79	5	23	40	40	184	36	82	92	110	41	106	57	28	155	45	63	89	155	54	37	47	55	123	30	26	72	23	72	15	18	10	142	103	53	18
KLRD1	NM_002262.3	Endogenous	42	67	23	28	164	94	32	34	60	70	51	22	12	17	17	75	65	149	46	62	22	64	79	34	30	57	37	41	56	42	43	24	24	38	48	31	22	28	41	45	8	5	10	52	58	59	9
KLRF1	NM_016523.1	Endogenous	18	20	7	28	22	44	27	11	53	39	15	9	1	12	24	33	23	47	433	30	22	30	45	42	23	185	15	23	252	16	41	27	21	38	88	18	19	44	33	31	5	9	27	17	58	24	22
KLRG1	NM_005810.3	Endogenous	21	26	4	49	9	131	38	35	116	13	37	56	11	27	7	72	83	26	70	66	26	39	46	55	43	91	8	32	16	65	113	21	20	21	101	13	16	29	49	93	16	23	12	77	106	43	15
KLRK1	NM_007360.3	Endogenous	34	82	20	111	67	444	157	46	214	226	139	104	17	42	50	162	190	39	263	151	76	67	185	132	66	260	85	107	163	205	96	28	53	74	163	40	26	63	88	116	45	41	18	281	234	185	132
LAG3	NM_002286.5	Endogenous	42	92	18	62	628	182	108	54	102	357	223	75	13	56	94	161	92	43	87	97	52	183	296	102	65	174	200	114	102	488	93	112	105	80	94	50	100	157	116	69	40	14	26	419	144	215	25
LAIR2	NM_002288.3	Endogenous	148	177	15	82	130	366	154	412	431	190	253	48	13	101	88	329	61	200	204	94	222	357	176	110	257	219	46	147	109	141	272	85	84	110	285	31	46	57	249	106	50	81	64	197	263	179	21
LAMP1	NM_005561.3	Endogenous	4594	5876	353	2486	3815	5811	6043	3401	5399	3851	2845	1068	299	2380	1762	4317	2830	5416	4948	5776	3344	6231	7795	1459	3118	3154	780	5018	5895	2231	3320	2302	9152	3760	2766	3339	2026	10433	7978	2636	3244	3337	3225	3954	4052	3175	1341
LAMP2	NM_001122606.1	Endogenous	1921	2070	248	1411	2380	3137	2322	1449	2619	2524	3875	391	230	1094	920	2099	1268	1915	4415	2360	1503	2422	2369	725	1379	1642	175	3993	3381	2136	1392	1567	2692	5469	3631	1965	1565	4696	4900	2091	2637	2009	3056	2240	3786	3438	862
LAMP3	NM_014398.3	Endogenous	174	267	50	69	172	548	501	287	244	203	624	47	9	111	296	442	331	191	239	1381	34	322	277	90	120	1224	50	399	299	644	365	435	2171	372	1339	251	1898	359	14566	878	24	8	21	77	599	57	13
LBP	NM_004139.2	Endogenous	23	66	2	26	8	20	8	170	11	18	10	6	37	10	11	28	17	51	264	16	23	1811	20	12	120	49	22	28	31	22	22	17	72	19	22	16	16	19	21	15	7	7	2	12	8	6	5
LCK	NM_005356.2	Endogenous	55	147	51	110	104	570	304	76	504	205	161	102	14	107	105	238	280	51	170	185	71	132	663	294	110	886	67	125	91	359	167	49	84	134	795	42	27	123	115	210	56	98	32	445	376	149	34
LCN2	NM_005564.3	Endogenous	1015	3190	2483	11360	66	209	841	48407	165	72	147	1872	19	229	174	779	691	494	943	5069	1244	15421	108	2496	272	7875	25	170	1539	3282	3885	483	44	4647	234	11148	915	41132	1790	2134	12	6	742	15	50	10	8
LCP1	NM_002298.4	Endogenous	1065	1840	302	1117	1929	2818	2043	459	4315	1163	1723	647	81	874	619	2329	652	678	1088	1066	1366	1663	1055	2022	1102	7062	652	611	756	1917	1121	804	472	899	3273	109	207	361	2258	1433	615	346	209	2903	2021	1096	249
LGALS3	NM_001177388.1	Endogenous	2865	4033	229	3974	4663	6699	4636	5263	15046	4005	4800	2125	412	3834	764	3632	2933	8507	6118	1878	4594	14248	3580	6561	3424	7484	318	1641	8044	1706	4915	2298	2946	7600	1665	7651	1927	3406	8635	6118	7908	6083	1240	4489	3029	23356	2289
LIF	NM_002309.3	Endogenous	215	381	7	189	281	288	631	2944	295	182	1644	79	28	642	566	380	274	185	1279	1073	291	153	203	541	454	138	36	237	686	738	260	132	70	64	155	206	28	247	307	202	64	9	28	55	152	192	6
LILRA1	NM_006863.1	Endogenous	26	18	13	31	22	22	22	18	27	21	36	12	13	14	14	34	22	23	24	36	21	49	33	21	29	24	25	16	22	27	28	19	20	24	58	13	14	25	23	20	12	16	19	26	37	20	12
LILRA4	NM_012276.3	Endogenous	13	9	11	15	11	12	16	14	30	11	22	4	7	8	3	15	10	13	20	15	12	18	22	13	10	66	25	11	13	17	13	24	17	10	109	11	8	12	7	9	14	19	5	16	24	10	4
LILRA5	NM_181879.2	Endogenous	54	152	54	69	117	62	67	31	173	57	233	20	10	41	64	93	53	85	47	70	70	106	91	94	86	33	97	83	48	97	109	79	32	61	53	22	20	37	64	38	20	29	46	68	80	37	51
LILRB1	NM_001081637.1	Endogenous	150	72	18	105	288	274	116	115	494	274	171	59	9	116	54	415	57	132	174	109	137	375	220	203	144	503	217	114	188	172	189	94	104	122	290	39	29	56	184	217	40	44	53	307	177	127	50
LILRB2	NM_005874.1	Endogenous	180	346	78	186	359	346	202	156	548	415	584	93	23	162	152	386	156	282	284	172	182	569	313	249	265	163	271	269	184	320	399	237	71	212	304	43	42	124	243	197	78	63	110	496	342	208	70
LILRB3	NM_006864.2	Endogenous	113	193	49	90	140	107	87	55	192	93	312	41	15	87	70	128	44	67	193	68	100	135	99	87	76	40	55	89	94	87	126	84	33	58	100	26	23	79	113	65	23	23	25	170	99	55	15
LRP1	NM_002332.2	Endogenous	3730	4873	53	2562	3373	3971	2355	4161	3673	2431	1097	699	684	1823	755	9849	2836	6462	1997	2463	2829	4514	2451	2720	4565	599	193	2910	2510	1443	3525	2235	1595	2011	1366	1465	4855	1855	3535	2729	2023	759	1364	1660	3745	1795	314
LRRN3	NM_001099660.1	Endogenous	95	144	32	162	112	189	213	109	203	117	98	46	20	93	50	176	137	197	230	234	138	227	199	130	147	182	193	143	185	98	142	136	180	166	142	90	87	156	204	133	98	65	69	123	200	113	81
LTA	NM_000595.2	Endogenous	26	38	12	29	61	112	67	21	95	52	18	19	9	25	18	79	47	43	49	37	35	86	72	105	42	351	10	46	36	47	36	41	43	50	191	22	20	42	44	35	37	25	13	77	71	39	11
LTB	NM_002341.1	Endogenous	90	186	76	219	2479	406	477	130	922	128	198	47	17	223	102	701	309	48	717	393	189	460	315	563	405	1972	74	355	85	424	287	130	105	459	3092	104	102	120	121	255	75	254	66	588	882	200	55
LTBR	NM_002342.1	Endogenous	2448	2158	197	1074	4378	1674	1150	3574	1261	1574	1207	453	155	1154	1369	1448	1091	2596	4174	2459	2700	4765	1342	1595	1102	690	44	4147	4800	2516	1779	1862	4146	3227	1095	8808	3109	3464	4287	2159	2329	723	1422	1117	1633	2232	290
LTF	NM_002343.2	Endogenous	26	12058	426	14796	29	44	400	117	38	42	162	77	7	38	180	148	905	59	924	492	34	63	196	32	1057	95	7	1957	722	11353	343	166	30	35384	63	969	268	57	394	1421	58	8	12	20	280	18	10
LTK	NM_001135685.1	Endogenous	113	26	17	48	27	460	266	33	467	22	42	100	13	214	38	142	48	173	96	71	28	147	94	413	45	39	23	46	149	42	90	33	35	69	118	24	25	152	49	23	30	156	191	29	135	22	54
LY86	NM_004271.3	Endogenous	142	131	15	137	113	370	97	97	630	149	100	25	12	93	14	520	71	252	177	99	152	383	113	232	185	435	18	57	66	46	71	53	78	78	273	18	25	54	280	167	62	78	57	88	188	78	41
LY9	NM_001033667.1	Endogenous	36	83	14	156	40	332	109	59	520	84	70	90	8	59	69	154	119	43	243	127	31	67	178	156	66	513	36	100	75	259	87	61	29	98	432	45	30	43	68	137	47	72	29	153	243	63	51
LY96	NM_015364.2	Endogenous	272	344	39	228	315	786	357	272	792	407	193	63	35	224	105	697	187	401	427	261	241	428	236	183	333	654	62	176	416	217	333	174	139	285	350	90	70	108	529	397	115	55	852	558	263	435	39
LYN	NM_002350.1	Endogenous	190	255	88	209	276	429	333	338	370	337	284	117	20	182	84	392	116	527	382	337	263	479	223	159	167	779	74	360	414	243	251	116	102	131	365	259	72	308	295	279	128	40	52	154	173	96	44
MAF	NM_005360.4	Endogenous	703	1415	42	244	426	483	427	245	456	184	190	70	69	244	227	649	443	577	580	286	349	696	1030	353	584	242	25	1021	697	306	383	388	157	804	530	1202	386	461	1595	565	313	223	229	340	595	383	34
MAGEA1	NM_004988.4	Endogenous	270	8	5	6	13	16	12	10	10	241	7	4	8	12	63	12	7	9	12	13	8	14	422	13	6	4	6	64	12	13	10	16	13	15	14	13	18	29	119	9	6	2	17	38	9	4	3
MAGEA12	NM_001166386.1	Endogenous	108	18	9	13	12	17	8	11	14	104	46	7	8	2	36	14	16	24	89	7	17	31	289	15	8	9	16	11	10	12	18	6	20	15	19	15	10	197	15	9	9	5	75	265	13	6	1
MAGEA3	NM_005362.3	Endogenous	1838	68	12	13	18	19	7	6	15	1971	903	9	15	12	2132	25	12	15	1929	23	25	23	4704	13	7	9	155	46	254	751	499	20	21	18	13	18	103	6407	47	8	254	5	2386	5280	14	8	10
MAGEA4	NM_001011548.1	Endogenous	190	13	9	14	112	16	16	9	16	13	16	7	6	12	17	18	14	11	16	12	5	31	354	13	6	12	13	310	324	480	14	155	11	16	27	3	125	876	35	6	4	6	5	55	18	8	2
MAGEB2	NM_002364.4	Endogenous	358	45	8	14	271	44	14	16	30	1332	15	10	1	12	40	40	238	24	100	16	20	33	269	29	23	1102	4	315	12	13	12	25	25	27	38	8	525	23	1660	11	12	1	17	34	13	6	8
MAGEC1	NM_005462.4	Endogenous	11	10	17	15	9	27	19	10	9	404	12	7	8	26	14	18	16	31	124	24	17	21	353	15	11	1566	108	19	9	10	18	15	15	22	20	14	30	8	880	5	155	9	1045	28	13	9	7
MAGEC2	NM_016249.3	Endogenous	62	19	15	22	33	21	23	18	25	31	11	12	13	10	20	30	17	30	232	32	20	41	261	23	24	23	15	22	13	20	17	23	22	15	32	25	24	27	825	9	5903	4	401	48	14	12	12
MAP2K1	NM_002755.2	Endogenous	832	1220	125	510	851	1390	644	895	1063	693	562	163	102	505	298	1128	766	1065	982	802	1160	1148	1996	602	735	795	118	1535	1904	677	519	684	1548	600	652	668	820	2003	2378	1011	689	251	394	519	541	532	198
MAP2K2	NM_030662.2	Endogenous	2457	2218	284	1218	1507	2975	1668	1783	1870	1192	1278	505	226	657	954	1779	1280	2803	3264	2349	1589	2364	2682	1134	1823	1330	352	3427	2767	1510	1521	2528	4338	2646	1893	2628	2007	2242	3095	966	3616	1295	1786	2763	3011	2612	881
MAP2K4	NM_003010.2	Endogenous	419	357	35	205	192	385	348	216	279	199	242	97	25	106	83	280	169	389	325	244	389	495	426	122	176	357	29	477	512	181	228	197	474	313	219	262	315	540	521	177	183	112	210	236	287	237	61
MAP3K1	NM_005921.1	Endogenous	616	1024	98	526	818	967	655	1224	1151	477	236	330	71	784	262	843	418	1103	1123	904	506	1218	642	487	513	1186	124	640	619	660	720	402	640	1054	1200	968	811	1041	1298	539	1291	560	605	616	1311	1276	698
MAP3K5	NM_005923.3	Endogenous	957	1625	114	797	424	1188	1597	876	1034	1233	886	488	84	819	385	1130	854	1095	2408	738	980	1430	652	1065	683	1099	100	1593	1920	887	1553	941	1121	1144	903	884	867	727	1972	967	254	98	314	464	870	252	51
MAP3K7	NM_145333.1	Endogenous	1033	1018	61	693	902	1248	940	1187	699	1010	457	278	102	518	370	1028	539	1299	1301	561	751	1305	1073	506	509	1257	169	1490	873	559	704	627	1570	1141	525	375	895	1018	1749	777	690	265	572	547	702	527	157
MAP4K2	NM_004579.2	Endogenous	581	285	29	151	274	481	291	334	391	166	178	80	30	202	115	271	272	818	455	364	129	301	562	245	107	543	107	785	439	261	249	343	807	323	339	388	484	862	666	200	170	159	307	320	367	181	96
MAPK1	NM_138957.2	Endogenous	1299	1314	86	818	845	1225	793	1627	1103	834	497	353	112	718	242	1094	804	2507	767	734	667	1259	1189	1027	699	1055	218	1729	1665	528	987	723	2902	1238	605	1539	902	2341	1990	1102	1203	317	1073	849	1177	939	323
MAPK11	NM_002751.5	Endogenous	125	86	11	78	48	99	91	63	42	38	82	31	18	16	38	149	72	113	109	74	67	73	82	97	165	60	27	268	111	73	152	109	37	173	100	734	104	405	149	59	144	20	176	184	157	126	14
MAPK14	NM_001315.1	Endogenous	1506	1488	145	897	1513	3276	1231	1522	1344	809	509	474	146	780	637	1469	890	4716	1696	1707	810	2896	11105	1366	959	1231	285	1258	1988	869	1221	943	1707	1222	1232	807	1352	1504	1237	1019	1614	866	1252	816	1516	1271	755
MAPK3	NM_001040056.1	Endogenous	803	910	262	657	582	1093	988	1056	730	571	321	273	135	392	441	848	587	1905	1697	745	605	1530	1899	788	760	1293	120	1025	1266	437	834	782	1606	943	972	1172	896	1119	1440	546	1102	374	447	635	723	557	207
MAPK8	NM_002750.2	Endogenous	329	549	41	315	359	634	371	375	317	260	175	129	45	187	222	506	490	944	349	388	347	529	822	322	264	459	114	293	815	248	337	309	1304	521	287	136	253	355	738	344	462	133	161	168	302	209	139
MAPKAPK2	NM_004759.3	Endogenous	1163	1442	97	876	876	1573	1047	1105	1156	735	790	210	87	560	657	916	873	1552	1547	1052	1149	1607	964	1009	750	844	161	966	1238	1363	653	973	946	949	693	899	861	1286	1230	521	574	247	424	631	817	741	254
MARCO	NM_006770.3	Endogenous	184	180	27	61	288	1935	717	36	5228	180	1015	16	24	586	211	3152	138	57	717	664	1093	900	285	493	1125	246	129	176	135	99	54	72	92	60	125	26	39	60	663	696	31	60	11	554	704	42	41
MASP1	NM_139125.3	Endogenous	17	35	16	39	18	23	11	20	17	16	19	6	11	13	12	22	23	27	30	41	21	128	25	24	20	13	4	23	15	22	59	34	23	31	26	18	25	42	28	7	35	3	9	10	24	12	6
MASP2	NM_139208.1	Endogenous	16	15	13	11	14	27	15	10	12	10	7	8	12	5	10	27	16	30	19	24	23	414	32	25	17	13	12	17	14	11	13	21	26	15	24	22	20	17	22	6	8	5	5	19	28	9	8
MAVS	NM_020746.3	Endogenous	1227	1172	60	475	586	1204	833	681	903	496	406	350	119	528	219	718	529	1386	711	657	676	1160	1434	491	526	1104	104	2391	1535	650	867	642	2233	1898	1037	792	1274	1049	1742	532	1347	491	886	1230	1240	1045	193
MBL2	NM_000242.2	Endogenous	13	8	8	5	11	15	11	9	12	4	10	8	5	5	7	26	18	22	20	12	11	166	17	11	12	8	3	20	10	12	9	16	26	15	9	12	16	13	17	7	5	7	5	13	11	6	4
MCAM	NM_006500.2	Endogenous	663	759	20	834	324	1369	631	739	401	404	1275	137	178	531	206	694	594	1570	687	349	1533	770	331	564	1296	374	36	512	479	237	1192	2053	372	818	294	446	432	1324	1086	231	308	1704	409	7555	866	583	209
MEF2C	NM_002397.3	Endogenous	456	1272	17	1545	257	1187	621	623	1343	509	440	225	753	409	241	1285	526	1416	539	415	512	1402	639	472	4007	1894	77	218	332	443	912	795	291	521	1107	188	155	308	448	556	622	398	1171	634	1534	1465	132
MEFV	NM_000243.2	Endogenous	22	66	40	35	37	52	25	25	50	15	53	13	6	26	7	38	18	25	30	20	26	63	37	20	13	22	16	22	31	34	55	55	22	23	39	18	17	40	53	26	14	7	6	23	39	20	6
MERTK	NM_006343.2	Endogenous	772	657	14	276	213	1177	373	419	690	344	274	131	38	203	132	612	200	1302	742	372	544	1023	610	562	406	771	65	2470	511	560	435	631	2022	734	651	150	817	193	2443	473	153	107	240	145	364	306	54
MFGE8	NM_001114614.1	Endogenous	3243	4528	72	3208	2186	5580	2702	3438	4201	3112	768	296	445	1986	927	3455	2442	3483	2740	1175	1593	2854	2707	3574	3207	1251	170	2659	2302	1716	1773	3082	3401	1988	1121	1865	1480	1481	4557	1960	3041	3529	2725	3246	5451	4149	492
MICA	NM_000247.1	Endogenous	235	276	23	114	211	298	290	118	137	221	140	104	31	133	71	267	223	593	373	126	137	707	257	500	209	183	28	289	161	136	271	313	846	201	222	258	398	151	195	152	401	167	196	217	394	320	111
MICB	NM_005931.3	Endogenous	165	200	24	68	459	773	284	163	453	430	124	73	19	96	80	273	158	1117	196	129	262	946	337	227	165	851	88	112	415	283	174	229	1356	114	331	56	53	165	220	169	593	55	51	635	201	510	32
MIF	NM_002415.1	Endogenous	8590	7889	259	1570	3867	10113	5904	8564	4080	3606	2157	515	130	2318	3129	3755	4444	5010	6040	5338	4615	10715	9813	6636	3074	3444	433	20155	11766	3428	2196	5033	26250	7952	2337	23577	15009	23001	14455	5301	5922	2170	2829	6408	5173	9377	3317
MME	NM_000902.2	Endogenous	129	351	29	47	406	102	151	28	103	477	109	44	35	146	20	69	196	282	208	46	53	29	3515	75	73	84	20	78	62	31	108	505	20	42	65	37	38	245	356	50	274	851	14	5560	874	59	1449
MNX1	NM_005515.3	Endogenous	7	8	4	8	46	20	17	30	12	5	8	4	5	4	32	30	12	22	17	111	25	24	18	42	10	15	2	33	15	6	9	20	26	10	42	15	48	6	17	3	39	6	10	4	20	12	47
MPPED1	NM_001044370.1	Endogenous	40	30	11	17	26	32	32	26	38	19	14	20	7	22	9	48	21	33	52	31	18	80	31	39	24	25	1	224	26	197	45	14	143	456	34	39	501	71	144	23	12	3	6	17	22	11	7
MR1	NM_001531.2	Endogenous	126	112	23	74	57	273	129	57	226	125	31	56	14	55	17	193	66	213	104	107	55	238	93	83	74	209	16	78	144	136	170	58	151	126	168	63	18	452	154	122	119	83	72	95	115	89	17
MRC1	NM_002438.2	Endogenous	768	1139	20	340	361	6488	855	205	4119	744	1277	120	114	628	83	4084	212	2068	780	1353	2721	4164	388	1625	1341	306	117	369	197	222	948	370	345	203	894	32	87	199	2659	963	280	76	328	1518	656	562	81
MS4A1	NM_152866.2	Endogenous	9	71	4	275	15	330	68	20	827	20	83	8	2	46	51	235	181	11	730	70	11	33	85	16	15	4372	46	48	20	202	55	10	15	24	851	10	8	20	16	172	23	242	10	24	703	54	41
MS4A2	NM_000139.3	Endogenous	65	99	17	123	31	68	134	127	104	61	35	172	17	76	34	193	166	92	218	109	28	53	62	102	71	46	14	106	130	73	383	30	30	55	66	23	29	76	38	67	80	4	18	7	55	18	8
MSR1	NM_002445.3	Endogenous	1159	770	15	487	1770	1717	815	633	2162	1520	682	101	37	669	160	1880	256	1869	1085	411	986	2185	820	1425	1466	126	167	439	455	395	497	410	749	445	541	46	114	373	2197	651	216	302	233	368	884	636	103
MST1R	NM_002447.1	Endogenous	88	147	34	112	586	773	502	268	385	513	149	158	12	197	50	279	271	752	1381	512	792	1680	340	1104	215	289	10	68	634	29	381	43	29	101	470	887	264	552	142	212	40	8	60	4	67	17	17
MUC1	NM_001018017.1	Endogenous	701	1274	292	641	1186	3436	4092	2260	1737	3209	4436	589	63	1927	1473	3472	3734	5086	20276	20268	1768	38469	2187	6403	4101	2077	39	1047	3374	238	1595	242	45	532	3267	922	311	377	842	3450	48	36	129	67	1182	133	4
MX1	NM_002462.2	Endogenous	2348	4589	703	1246	9120	2745	7379	1266	2342	2910	984	509	109	1991	262	1701	1541	4788	983	396	760	11594	2761	1615	634	4982	1483	1539	1821	5056	1234	4150	3824	1696	6011	799	5364	1456	10797	790	284	226	159	1323	2794	910	319
MYD88	NM_002468.3	Endogenous	835	1047	264	648	883	2244	1270	1251	1792	770	1035	248	54	578	348	1181	589	1516	1033	906	1127	3005	767	956	720	1151	291	958	1087	842	941	782	1045	908	1254	1676	829	1181	1983	855	1479	532	456	919	953	668	258
NCAM1	NM_000615.5	Endogenous	38	298	26	248	28	43	54	43	63	35	24	32	23	56	71	123	65	56	43	896	32	58	36	42	635	61	18	85	37	31	105	56	2336	60	46	30	41	35	399	30	16	14	17	26	55	19	12
NCF4	NM_000631.4	Endogenous	193	225	61	267	173	585	356	131	581	198	281	91	37	135	121	420	178	282	325	237	309	543	335	379	301	515	63	231	196	224	447	156	70	193	378	65	64	132	342	178	103	70	96	256	394	151	34
NCR1	NM_004829.5	Endogenous	21	41	26	23	22	35	19	22	43	61	24	16	10	16	23	37	34	24	35	38	20	40	53	24	22	51	18	39	26	41	33	22	28	25	59	28	23	27	20	28	15	10	11	23	70	57	2
NEFL	NM_006158.3	Endogenous	312	150	12	40	15	32	27	20	20	21	15	9	8	15	14	27	29	20	24	24	15	26	19	36	22	45	13	408	11	58	24	70	28	190	24	22	282	82	1689	61	7	4	12	6	21	15	8
NFATC1	NM_172389.1	Endogenous	291	266	17	600	172	278	201	176	267	226	293	82	69	117	55	305	144	164	438	147	135	214	157	165	295	458	17	493	206	293	292	214	124	226	218	499	334	272	264	187	167	104	285	259	488	210	18
NFATC2	NM_012340.3	Endogenous	399	817	30	2533	384	1252	632	620	758	485	1335	311	87	357	189	754	464	828	665	477	329	698	463	826	782	1444	93	326	327	749	647	331	293	449	1069	83	143	213	596	342	473	321	230	462	1451	453	66
NFATC3	NM_004555.2	Endogenous	653	545	54	382	422	611	360	539	704	541	157	221	78	259	175	711	348	874	659	536	315	569	1522	377	383	889	108	502	854	352	621	363	1588	569	692	536	551	716	686	468	703	258	274	464	517	530	173
NFATC4	NM_001136022.2	Endogenous	383	559	22	408	471	885	600	640	741	430	96	204	68	503	521	829	503	944	1287	526	601	186	1407	725	632	958	96	564	373	253	929	645	176	640	647	233	600	497	382	212	210	255	106	68	315	120	54
NFKB1	NM_003998.2	Endogenous	175	391	36	292	313	256	163	111	221	252	219	76	36	145	43	295	125	362	176	163	186	240	212	118	152	510	36	215	414	201	257	191	489	188	211	266	72	465	242	207	286	101	109	126	134	99	51
NFKB2	NM_002502.2	Endogenous	514	728	112	1024	1645	850	765	542	677	685	1105	200	77	684	293	830	617	861	1276	474	574	973	949	938	636	1250	138	687	850	912	784	779	500	632	857	1112	332	796	314	508	494	310	185	1105	609	269	153
NFKBIA	NM_020529.1	Endogenous	4967	5501	1632	8381	5099	3755	3544	4970	6681	1968	10626	689	351	3335	2917	2296	2345	5764	5235	2748	2260	3102	3190	2544	3106	3938	399	6837	4643	5075	2729	2469	2308	4993	3059	16116	3260	5566	8243	5493	862	836	745	2486	4093	1815	400
NLRC5	NM_032206.4	Endogenous	373	706	119	211	571	826	728	252	539	652	498	180	45	226	243	664	489	405	910	263	316	646	1627	1047	442	838	78	407	425	659	421	521	463	581	1175	268	409	615	823	244	433	202	186	550	716	544	71
NLRP3	NM_001079821.2	Endogenous	151	195	22	309	93	155	92	47	95	60	473	31	15	33	20	133	73	92	127	102	86	141	88	66	126	82	39	47	52	67	125	71	54	60	153	29	21	52	264	53	46	29	34	126	140	77	11
NOD1	NM_006092.1	Endogenous	250	309	24	205	295	905	337	366	640	317	195	86	40	295	201	618	373	1236	892	418	253	363	432	764	367	256	57	484	204	211	400	279	320	452	582	231	359	237	550	216	329	174	281	246	409	173	55
NOD2	NM_022162.1	Endogenous	185	384	87	138	273	215	118	70	248	147	88	63	10	79	57	183	81	147	139	89	100	185	194	87	79	196	44	67	129	109	131	66	97	187	272	35	106	339	370	135	41	21	51	77	141	65	11
NOS2A	NM_153292.1	Endogenous	55	58	601	20	33	52	21	29	23	20	27	154	7	17	13	41	33	127	64	27	28	42	41	30	18	36	9	40	36	957	269	101	555	49	27	16	137	38	628	339	10	6	21	16	11	19	7
NOTCH1	NM_017617.3	Endogenous	577	396	82	589	379	570	459	821	430	283	269	342	53	222	134	573	404	948	648	563	612	558	1063	752	607	449	55	1494	826	765	781	988	573	898	586	603	1080	1185	480	232	270	179	1214	278	570	514	179
NRP1	NM_003873.5	Endogenous	1965	2860	43	2170	1769	4132	3187	3360	3373	2975	2821	805	719	3401	1032	4348	2302	5894	5381	2107	5739	5157	1393	4652	3188	1686	143	1550	4020	827	3983	3675	992	1773	6883	964	705	1187	2594	1406	1104	392	932	751	1792	1009	238
NT5E	NM_002526.2	Endogenous	278	636	33	266	414	334	1667	428	554	346	516	89	45	564	134	662	704	815	414	217	2323	1889	240	440	437	174	20	512	331	118	432	263	176	250	649	92	145	218	683	103	149	47	106	61	142	125	21
NUP107	NM_020401.2	Endogenous	953	692	75	584	1846	1143	839	993	589	1312	305	205	90	440	437	770	412	2073	10407	651	398	3051	2153	532	512	1652	228	2260	2168	879	718	671	3618	1010	526	707	1488	1404	1429	1921	1223	602	451	735	494	801	339
OAS3	NM_006187.2	Endogenous	568	1166	330	241	3232	766	1799	422	787	601	463	158	37	457	114	637	517	1567	402	501	457	7034	2834	649	322	1392	302	645	936	3471	539	1303	1129	484	2159	388	723	827	2755	310	1311	216	102	723	656	485	112
OSM	NM_020530.4	Endogenous	42	58	120	275	31	140	75	24	67	22	88	7	9	24	67	68	28	42	42	29	47	68	82	58	312	21	10	37	83	57	51	150	26	26	111	17	25	30	62	18	9	10	14	40	35	13	5
PASD1	NM_173493.2	Endogenous	8	10	13	12	249	19	18	16	9	12	6	4	4	6	7	13	15	17	20	15	15	23	490	10	16	10	3	17	13	14	11	12	27	11	17	13	20	12	27	6	4	1	2	379	10	8	3
PAX5	NM_016734.1	Endogenous	29	87	16	54	10	117	36	15	184	9	28	6	9	14	21	61	40	13	157	31	16	21	93	59	18	654	14	36	22	47	23	19	12	13	157	22	19	76	41	24	10	36	6	8	122	13	14
PBK	NM_018492.2	Endogenous	148	73	22	39	72	162	79	44	28	68	24	16	10	45	13	39	19	187	110	119	65	83	610	25	42	228	53	502	376	228	61	70	497	69	40	106	54	427	355	137	602	107	76	112	67	453	113
PDCD1	NM_005018.1	Endogenous	20	38	6	19	48	119	33	15	75	72	75	12	5	22	21	33	63	18	51	27	42	51	79	71	42	184	19	51	37	105	39	24	36	35	80	17	11	36	53	32	16	14	11	44	92	93	9
PDCD1LG2	NM_025239.3	Endogenous	102	163	13	48	337	231	85	57	149	217	103	56	14	106	28	257	54	119	88	55	147	177	105	83	106	140	55	103	78	145	105	119	128	95	125	17	26	83	132	125	53	15	11	186	120	68	11
PDGFC	NM_016205.2	Endogenous	756	1185	17	448	644	1006	785	405	670	558	254	107	36	679	148	1756	591	850	903	349	606	1263	244	375	526	114	22	525	1062	257	335	391	1540	271	316	383	245	167	714	914	97	25	80	127	352	142	12
PDGFRB	NM_002609.3	Endogenous	1418	3414	21	1442	2478	3798	1299	3060	1585	1070	465	435	328	1174	333	3677	2032	6308	2522	1456	2039	798	1430	1929	2952	748	30	997	1161	538	2098	5791	1505	1739	917	712	1245	1590	1688	1565	1261	205	596	445	1323	775	97
PECAM1	NM_000442.3	Endogenous	1785	3104	78	3030	927	4772	2033	3192	4498	1752	1715	911	1359	1052	810	4766	2478	3873	2726	2523	2724	2161	1529	2029	5990	1726	181	1142	1859	1876	7251	5401	957	4704	2052	883	720	1412	2172	2044	1491	447	743	1522	3878	968	194
PIK3CD	NM_005026.3	Endogenous	320	352	44	258	213	670	347	235	672	247	225	178	31	170	90	600	391	204	381	305	324	762	317	434	237	1070	160	255	306	261	414	204	138	172	874	345	83	199	291	310	981	523	169	1076	626	561	563
PIK3CG	NM_002649.2	Endogenous	117	183	22	185	93	447	240	125	661	199	153	83	23	117	158	402	127	196	233	239	131	258	1156	187	196	688	59	164	128	235	210	133	70	142	622	50	49	92	162	167	62	46	44	298	453	100	31
PIN1	NM_006221.2	Endogenous	665	542	42	255	279	871	531	344	536	453	247	170	58	201	317	580	300	756	768	796	273	691	907	389	430	524	86	1546	577	595	454	491	1905	766	589	595	707	715	1034	310	1289	466	519	615	812	662	269
PLA2G1B	NM_000928.2	Endogenous	11	16	23	18	22	33	34	203	19	20	43	5	7	9	13	18	163	23	33	168	15	49	27	25	16	15	5	20	12	18	13	16	31	14	151	24	19	14	22	61	10	9	14	8	52	17	8
PLA2G6	NM_001004426.1	Endogenous	483	250	30	284	307	335	291	1419	214	121	117	249	37	110	111	256	262	339	419	566	135	455	548	504	219	250	19	395	217	440	359	218	1343	424	269	356	670	594	435	115	351	977	533	504	496	550	340
PLAU	NM_002658.2	Endogenous	3539	3407	160	988	2489	19616	7502	2069	1863	3080	3293	135	139	5148	941	7670	4183	16913	1818	475	5501	16065	1939	4427	5687	2341	43	2450	8710	1207	904	3877	1152	1074	1656	733	1038	1461	1853	1697	364	107	265	899	573	751	96
PLAUR	NM_001005376.1	Endogenous	654	718	523	603	1256	973	814	337	953	582	1909	28	45	623	307	944	452	1644	726	488	878	2077	729	1296	952	169	37	530	534	498	201	565	264	366	290	763	196	444	796	396	462	74	74	367	290	183	64
PMCH	NM_002674.2	Endogenous	12	21	6	13	44	42	14	20	53	18	11	6	4	14	6	39	19	28	23	12	19	39	29	19	33	17	7	26	26	7	15	16	14	23	25	14	14	17	35	12	8	7	6	4	13	13	10
PNMA1	NM_006029.4	Endogenous	408	322	13	204	336	616	460	431	270	460	261	181	47	246	463	394	310	662	393	260	394	528	897	279	262	1297	105	325	483	166	621	332	264	322	241	816	445	203	670	301	270	388	455	298	560	426	132
POU2AF1	NM_006235.2	Endogenous	68	99	8	93	13	143	59	31	282	40	39	41	5	33	156	76	41	14	109	70	13	47	103	31	18	381	19	140	154	103	70	28	4	186	131	37	18	24	17	97	7	26	13	47	345	26	3
POU2F2	NM_002698.2	Endogenous	95	164	22	142	94	206	109	122	248	83	58	43	17	60	122	179	150	77	244	91	136	152	155	181	79	685	31	118	77	116	179	168	48	126	230	120	72	82	123	121	30	60	34	75	303	56	17
PPARG	NM_015869.3	Endogenous	164	35	15	60	27	331	146	36	367	32	207	20	57	65	8	208	82	259	205	103	321	1605	151	179	111	83	8	501	311	60	79	23	566	109	47	36	55	14	139	60	38	28	21	46	100	120	11
PPBP	NM_002704.2	Endogenous	55	60	42	145	33	71	64	110	1097	32	109	16	221	325	33	129	58	235	57	65	66	79	37	113	324	29	224	41	69	34	1264	462	62	63	55	197	34	138	134	16	22	9	13	46	45	20	16
PRAME	NM_006115.3	Endogenous	462	149	33	69	728	97	87	2899	131	970	113	34	24	45	97	105	880	146	139	80	75	201	1245	67	53	555	230	1925	364	365	91	356	2747	445	100	56	1995	2733	1393	149	3900	2829	8854	7006	85	7862	20
PRF1	NM_005041.3	Endogenous	90	289	31	130	256	443	315	72	317	381	533	271	35	107	210	526	249	115	224	327	131	121	292	143	125	272	282	234	282	553	279	449	139	85	242	83	44	128	209	266	36	42	34	510	316	373	36
PRG2	NM_002728.4	Endogenous	37	74	16	99	63	93	110	199	123	20	90	35	11	56	26	151	94	205	319	28	44	233	61	310	66	55	11	55	57	28	57	42	32	44	248	40	17	359	51	35	228	44	16	24	50	93	16
PRKCD	NM_006254.3	Endogenous	940	583	138	707	893	2131	772	876	1967	607	744	439	48	518	477	717	695	1605	1690	1465	1050	3087	965	1273	511	1708	201	1049	1971	570	627	585	521	629	1350	810	558	953	1014	658	1235	1339	756	1378	1298	1646	224
PRKCE	NM_005400.2	Endogenous	165	115	9	103	62	114	157	268	160	74	102	89	11	66	46	137	149	270	311	189	106	147	165	105	152	187	9	140	141	101	246	90	228	175	257	107	110	145	193	82	190	288	480	211	393	304	44
PRM1	NM_002761.2	Endogenous	16	21	21	26	20	35	16	13	11	11	13	5	6	12	11	20	19	27	16	20	34	38	30	20	15	20	10	16	12	12	20	18	29	29	21	23	23	25	25	9	8	3	3	10	18	17	15
PSEN1	NM_000021.2	Endogenous	1008	1052	136	608	993	1441	905	1038	903	986	517	283	79	810	436	1054	592	1758	1152	803	745	1310	927	744	517	1762	165	919	1387	470	823	539	1232	1121	540	1010	610	958	1768	844	612	390	519	568	818	653	264
PSEN2	NM_000447.2	Endogenous	383	402	36	298	398	629	400	602	719	345	222	194	50	377	167	450	332	999	1043	639	367	871	1228	606	410	490	119	424	768	256	482	228	516	435	474	357	261	431	595	263	2592	881	451	766	417	1254	935
PSMB10	NM_002801.2	Endogenous	272	859	106	329	648	857	805	260	885	1295	891	286	35	341	386	713	458	521	593	541	499	1370	1276	602	549	1563	113	586	580	912	625	474	468	707	1568	248	310	845	486	445	810	255	481	868	1072	905	88
PSMB7	NM_002799.2	Endogenous	2999	4248	312	1788	2162	3836	1794	1835	2176	2463	905	548	224	1217	549	1946	1041	3838	1676	1910	2861	4992	3862	1177	1502	3794	918	7202	3907	1891	1774	2560	7285	3460	1532	2024	3303	4879	4123	1581	6660	2430	2599	3380	2576	5209	1071
PSMB8	NM_004159.4	Endogenous	1135	3259	301	1112	1918	3521	3395	946	2314	2501	1450	708	131	1010	516	1847	1390	2600	2349	1537	701	4978	8214	1422	1087	4310	560	1265	2150	2528	1694	1217	2416	1198	1789	462	762	2080	2213	1214	2200	1242	1165	1999	2642	1790	465
PSMB9	NM_002800.4	Endogenous	336	1952	241	412	1893	2414	1951	432	1041	3674	1630	457	80	637	450	1259	905	967	1130	565	367	4065	7372	1061	716	3434	544	908	987	1995	1118	739	1422	838	1481	288	397	1403	1055	841	1278	439	290	1274	1329	989	133
PSMD7	NM_002811.3	Endogenous	4026	3649	134	1340	1943	2330	1625	2652	1591	2585	954	363	201	1071	1304	1884	1035	3960	2580	1816	1151	2532	4406	1093	1516	3060	372	3240	6361	1498	1735	1854	10083	4098	1984	2533	2782	5540	8221	1140	1263	878	1332	1497	1198	1705	541
PTGDR2	NM_004778.1	Endogenous	14	18	6	14	13	23	10	15	13	15	9	16	9	12	11	26	21	20	22	26	18	40	23	18	18	29	5	19	13	9	15	16	34	19	25	18	15	29	21	5	12	14	26	13	17	7	3
PTGS2	NM_000963.1	Endogenous	113	345	201	518	147	137	469	452	90	136	530	28	35	1333	189	411	351	4074	629	326	21	77	179	440	1273	221	18	446	1217	147	226	367	38	111	98	1262	83	81	307	272	54	100	63	49	196	19	7
PTPRC	NM_080921.3	Endogenous	533	929	349	773	1334	1739	775	490	2241	1368	1385	694	59	718	248	1685	772	629	762	826	611	1689	1142	1263	909	2132	546	765	650	1170	997	412	381	486	1774	86	96	301	1266	1235	233	283	284	1640	990	759	153
PVR	NM_006505.3	Endogenous	793	646	64	349	794	647	553	816	570	651	1744	110	62	574	326	480	637	969	993	938	1293	1852	767	1068	553	253	74	1058	1047	320	458	559	973	725	538	569	1079	1055	1986	479	653	300	307	412	388	1054	93
PYCARD	NM_013258.3	Endogenous	275	270	43	126	108	410	159	147	309	179	171	54	7	57	46	221	133	147	279	179	111	346	188	398	175	185	30	813	231	532	162	136	369	159	323	218	520	676	519	93	317	345	747	166	295	166	49
RAG1	NM_000448.2	Endogenous	245	66	9	25	76	131	42	26	35	36	23	11	7	38	19	88	42	76	53	33	35	67	66	29	40	16	9	176	121	27	23	48	246	155	23	40	108	83	112	70	27	12	15	16	34	27	13
REL	NM_002908.2	Endogenous	895	1043	90	598	340	1401	811	403	752	381	904	153	50	560	222	620	302	655	1024	416	305	558	885	894	418	1019	76	863	949	822	361	282	632	394	811	623	558	522	1075	534	464	154	209	386	545	196	91
RELA	NM_021975.2	Endogenous	313	474	40	225	277	313	322	327	292	220	235	63	25	163	141	284	298	552	344	331	248	449	396	189	218	323	60	493	418	277	218	229	569	339	226	415	195	661	652	244	260	195	192	266	418	262	109
RELB	NM_006509.2	Endogenous	372	411	44	225	816	244	313	141	271	315	390	50	22	226	102	302	211	249	331	159	160	344	274	233	211	380	46	410	398	353	261	284	177	290	215	383	115	442	406	236	122	105	80	264	199	142	64
REPS1	NM_001128617.2	Endogenous	1672	851	70	652	544	1023	683	814	775	579	378	295	58	377	180	764	536	1156	986	479	979	955	1042	504	456	1289	129	2216	1512	772	726	676	1934	1584	434	773	1363	1390	2305	616	695	177	294	474	753	291	99
RIPK2	NM_003821.5	Endogenous	451	372	35	240	845	1009	484	491	440	333	1410	63	38	693	113	336	210	586	609	213	426	552	696	242	231	706	104	344	598	393	192	274	648	258	260	230	236	322	679	312	402	145	170	309	302	820	97
ROPN1	NM_017578.2	Endogenous	20	32	11	25	26	42	20	26	27	17	25	14	5	11	10	41	14	40	31	49	22	51	43	28	15	35	10	35	28	19	38	28	40	34	27	11	37	34	26	14	16	8	10	19	39	21	17
RORA	NM_134261.2	Endogenous	604	463	63	600	410	429	433	469	384	118	312	239	74	185	207	354	432	453	757	510	141	252	978	388	325	249	41	1178	264	668	325	376	324	526	366	455	1115	772	776	464	382	46	149	180	452	134	133
RORC	NM_001001523.1	Endogenous	16	48	17	94	36	248	270	504	126	741	39	81	61	126	40	82	339	57	365	1975	1017	678	90	328	213	308	6	52	25	35	147	19	26	79	78	28	34	40	28	68	20	15	16	19	72	18	9
RPS6	NM_001010.2	Endogenous	27565	23621	2411	26842	12448	45647	20394	24874	44661	24095	15906	9524	2360	9860	11140	29461	16305	32076	19890	39537	93108	23896	37989	30857	19951	28811	4130	37245	45995	20701	23825	41738	71213	29470	25712	33569	15009	74099	22883	32967	31388	33331	17959	50179	52340	22618	9593
RRAD	NM_004165.1	Endogenous	31	484	29	205	86	77	97	39	34	58	199	98	41	13	23	22	62	49	50	60	188	55	39	51	249	196	3	26	42	33	132	31	20	153	307	14	27	204	57	27	11	6	16	9	72	8	1
RUNX1	NM_001754.4	Endogenous	1410	1980	38	825	1446	2467	1445	1438	1454	1339	846	692	61	927	439	3278	944	2617	2040	1000	1094	1955	1884	1824	1150	647	67	1280	1206	732	1777	1076	1869	885	1099	1303	936	1456	1206	1199	229	193	196	483	769	282	38
RUNX3	NM_004350.1	Endogenous	356	396	42	287	368	337	344	133	435	233	438	148	25	126	169	235	316	123	225	136	77	230	1278	192	145	853	61	344	283	496	281	334	433	217	622	55	191	252	509	185	2885	467	307	1084	610	1107	970
S100A12	NM_005621.1	Endogenous	109	464	295	110	12	13	30	17	22	24	162	7	10	19	12	11	13	18	38	37	27	21	15	18	13	25	42	38	53	135	153	63	13	264	13	261	46	4064	364	368	11	8	107	12	24	6	16
S100A7	NM_002963.2	Endogenous	1816	34458	29435	231	11	22	42	24	17	16	13	7	12	9	14	21	24	17	157	29	23	36	39	49	13	14	187	227	15	1296	42	76	16	367	18	3796	371	18823	4018	2617	447	7	11851	7	17	6	10
S100A8	NM_002964.3	Endogenous	3625	24539	29436	54402	385	530	484	185	977	641	1635	88	62	410	227	728	244	118	12560	373	996	491	278	986	673	168	609	1725	1013	19003	3397	598	56	12309	371	58471	2168	164141	14453	34475	378	61	14845	284	207	39	49
S100B	NM_006272.1	Endogenous	124	234	38	706	25	245	200	56	289	75	54	59	123	140	12	353	51	59	62	202	65	392	97	80	208	276	18	73	47	76	83	62	36	123	757	18	32	47	475	62	2654	7155	2040	11348	6887	10933	21
SAA1	NM_199161.1	Endogenous	147	7143	376	8650	277	272	657	2866	105	146	120	618	852	113	156	638	106	152	159	108	373	31673	120	560	7703	812	93	531	786	5190	1329	608	207	4226	128	10249	449	5168	1160	299	469	20	27	24	35	39	11
SBNO2	NM_014963.2	Endogenous	703	1942	335	902	1465	1361	1310	2491	972	1141	1186	305	73	856	592	1797	963	1681	2529	864	862	2190	1294	1897	1348	789	115	1587	1666	864	1602	1198	918	1245	1206	2680	862	2067	1057	882	1993	322	915	676	864	1017	274
SELE	NM_000450.2	Endogenous	60	107	16	352	13	91	44	74	20	26	168	19	11	14	17	35	38	57	27	33	17	24	61	53	570	40	6	19	19	108	171	130	19	133	37	40	37	42	23	10	34	9	15	28	22	37	6
SELL	NR_029467.1	Endogenous	61	249	165	237	46	311	182	53	572	95	252	49	19	120	92	196	74	66	209	87	57	171	96	39	93	1128	150	109	124	329	238	97	37	144	1107	41	27	60	111	215	60	193	40	200	434	104	44
SELPLG	NM_001206609.1	Endogenous	198	215	39	101	232	591	225	100	548	204	217	63	13	129	86	495	166	211	160	194	304	544	213	468	222	285	67	199	124	221	224	105	97	128	495	40	65	228	252	167	63	45	67	244	330	113	29
SEMG1	NM_003007.2	Endogenous	17	12	13	13	14	18	16	11	12	10	13	8	3	9	10	23	18	18	22	19	10	23	17	17	18	14	5	19	14	13	11	12	16	19	17	11	19	17	13	9	3	8	8	8	12	9	3
SERPINB2	NM_002575.1	Endogenous	84	671	618	1885	37	23	18	15	16	12	11	12	8	21	11	27	15	25	24	16	16	29	20	154	15	10	11	83	27	227	113	50	22	139	21	187	165	137	128	254	31	5	86	4	22	15	7
SERPING1	NM_000062.2	Endogenous	2410	5683	341	3582	8400	7637	3373	4484	4312	6131	3076	1438	977	2730	1572	8919	6463	6790	3179	3320	2662	13707	5155	4901	5243	1330	524	2842	3176	2944	5786	3918	1607	2963	1358	903	1332	1098	2684	3153	1412	571	531	2407	5427	3196	190
SH2B2	NM_020979.3	Endogenous	35	67	40	65	69	160	96	67	117	72	89	28	25	43	65	83	69	87	94	110	187	185	81	75	160	349	40	152	149	53	93	83	49	125	121	128	74	134	120	44	29	52	16	62	81	66	22
SH2D1A	NM_001114937.2	Endogenous	31	33	7	45	34	204	66	27	154	62	70	153	3	32	27	68	82	20	70	54	29	42	116	74	38	354	31	48	51	147	50	7	29	32	145	16	14	33	28	58	12	16	13	184	125	72	13
SH2D1B	NM_053282.4	Endogenous	16	21	9	11	17	37	12	22	41	26	22	23	17	19	11	31	23	34	36	28	17	44	22	17	31	50	8	21	23	28	30	15	31	18	70	21	14	29	25	31	7	5	1	16	35	22	7
SIGIRR	NM_021805.2	Endogenous	267	194	44	261	463	967	552	1063	569	301	190	217	34	665	222	514	478	1009	1285	874	411	717	1054	861	360	555	30	396	284	187	606	230	185	378	834	486	229	511	296	209	90	93	317	165	535	128	31
SIGLEC1	NM_023068.3	Endogenous	476	548	23	156	892	1049	606	138	1133	704	393	160	87	418	106	814	89	823	597	321	753	2200	625	528	525	335	243	302	217	384	605	423	192	255	1190	40	177	138	1560	305	255	155	302	721	955	548	83
SLAMF1	NM_003037.2	Endogenous	268	375	43	256	325	505	350	294	503	351	342	113	37	178	163	440	319	373	686	632	254	1106	383	559	424	575	63	376	365	271	373	247	157	284	608	226	163	263	427	296	249	204	173	554	463	266	56
SLAMF6	NM_001184714.1	Endogenous	26	37	8	42	25	121	48	29	111	40	35	30	9	24	22	58	39	27	80	43	17	35	64	59	26	154	17	51	25	59	37	18	31	40	94	25	24	23	40	33	14	18	16	63	84	48	10
SLAMF7	NM_021181.3	Endogenous	58	115	20	137	176	335	115	65	628	271	113	180	7	83	248	217	84	22	91	190	33	595	359	304	75	231	83	189	127	475	145	60	30	224	196	150	54	72	197	284	632	39	32	1258	632	151	40
SLC11A1	NM_000578.2	Endogenous	805	1258	114	231	1492	2001	602	445	2388	565	2143	27	41	408	523	2075	260	1461	1683	480	1372	1578	394	875	531	68	120	325	517	265	325	717	299	244	321	56	171	187	1633	354	23	108	52	116	478	101	13
SMAD2	NM_005901.5	Endogenous	1280	925	72	783	895	1455	1003	649	1140	1055	348	339	84	705	201	1366	456	1482	1141	1281	280	1614	2101	777	698	1025	225	1737	1561	726	1035	800	1884	1393	534	897	1295	2131	2472	925	2418	542	557	668	1072	1092	635
SMAD3	NM_005902.3	Endogenous	2543	1668	80	805	1072	997	1371	1025	781	679	815	639	119	1089	319	848	1195	1601	1345	1471	1122	1437	1310	1324	873	1263	80	2274	2784	1565	1611	739	1125	1523	808	1257	1424	2818	2387	858	608	243	712	316	1121	369	271
SMPD3	NM_018667.3	Endogenous	82	102	30	117	81	128	98	489	152	105	79	84	19	50	39	136	78	113	144	218	69	157	309	100	118	256	24	107	152	94	195	105	114	168	176	96	91	127	142	78	74	33	82	97	117	73	25
SOCS1	NM_003745.1	Endogenous	303	277	72	200	425	459	188	215	488	254	397	107	17	139	139	678	196	249	355	157	116	315	210	132	200	590	60	530	176	272	285	176	1130	427	483	212	927	170	787	267	34	43	37	121	269	186	24
SPA17	NM_017425.3	Endogenous	255	409	21	173	294	313	363	1022	264	243	83	920	13	408	78	308	166	289	232	523	180	327	491	405	146	1247	36	266	398	224	1867	264	655	619	277	121	262	513	230	85	170	125	99	197	120	280	59
SPACA3	NM_173847.3	Endogenous	12	15	8	8	23	46	19	22	11	14	18	8	9	14	7	59	24	53	24	21	25	17	19	20	26	12	5	20	15	10	15	31	20	23	17	23	30	15	26	18	125	4	8	23	17	5	10
SPANXB1	NM_032461.2	Endogenous	14	24	8	18	12	29	16	11	12	31	13	5	7	9	2	17	22	29	23	12	15	36	102	15	10	13	3	18	32	13	10	18	28	35	19	19	17	23	49	10	13	3	3	10	16	21	6
SPINK5	NM_006846.3	Endogenous	355	624	636	4568	91	33	84	89	21	12	22	236	20	24	25	52	39	79	59	57	20	27	258	68	48	122	19	737	186	256	645	124	244	1196	1107	278	767	1022	1145	732	203	4	904	288	24	11	5
SPN	NM_003123.3	Endogenous	47	76	16	58	71	393	221	46	482	94	166	59	12	65	70	351	103	43	194	187	119	84	142	245	108	295	27	92	62	184	118	49	39	110	514	35	23	38	75	80	27	42	26	293	245	86	39
SPO11	NM_198265.1	Endogenous	18	15	7	6	12	28	10	11	13	11	13	6	3	8	10	28	15	37	22	15	11	16	15	10	13	12	6	12	20	12	6	27	20	10	6	10	11	12	18	11	10	8	8	13	15	4	10
SPP1	NM_000582.2	Endogenous	19984	10300	27	2719	35385	564	11794	6768	5018	16708	15562	111	184	10441	2980	4976	2867	5270	5064	2366	4256	15524	13084	5741	6905	2426	2184	17616	122646	1711	402	40570	10238	10959	1888	787	4155	1720	50162	9793	154	1482	4956	11996	552	8091	2223
SSX1	NM_005635.2	Endogenous	6	8	5	16	13	21	12	9	24	18	23	3	6	8	7	25	40	20	24	17	10	40	224	15	13	67	7	19	6	13	15	10	13	14	25	14	7	16	22	9	3	6	5	500	19	7	9
SSX4	NM_005636.3	Endogenous	2	12	11	17	8	19	12	14	17	12	11	4	4	10	12	12	9	8	7	13	10	17	62	18	11	19	1	8	1	8	10	8	16	8	11	11	21	14	16	7	6	4	9	6	9	8	8
ST6GAL1	NM_003032.2	Endogenous	327	835	27	1197	562	2001	1001	686	2375	1040	402	865	123	454	808	1120	637	1463	2277	2078	483	2948	594	833	764	1675	131	755	3421	967	2056	401	560	1082	1155	1861	299	302	963	912	514	570	504	660	3063	912	135
STAT1	NM_007315.2	Endogenous	944	2017	467	557	4403	3331	2302	447	2251	5616	1749	572	84	1902	664	1649	761	2464	1592	645	1179	6474	7247	552	996	4318	774	4318	2676	2986	1347	1377	2258	1661	1922	617	689	1316	5642	2349	1654	837	1008	4099	3225	3434	338
STAT2	NM_005419.2	Endogenous	2904	4045	220	1576	6022	3679	3369	3286	2674	4024	1628	1177	232	1797	1357	4372	2411	4881	3935	2317	3195	10852	4463	4595	2264	2846	678	3002	3091	2878	3017	3377	2947	2495	2700	1915	2840	2289	3263	2071	3383	2538	3480	5910	6010	4866	859
STAT3	NM_139276.2	Endogenous	4305	6761	1921	4795	4497	5560	6269	5521	3412	3688	5027	1732	537	2817	4137	5838	4773	6543	13183	7840	3204	6362	5439	2969	4949	3867	529	5616	6940	8664	6492	3508	6245	5615	3486	3964	2986	5513	6603	3809	2452	2347	2578	3501	5330	2389	618
STAT4	NM_003151.2	Endogenous	84	148	27	156	118	338	201	95	262	119	360	79	27	179	56	207	172	151	293	138	80	171	193	221	112	360	57	126	210	196	150	85	75	157	408	101	42	81	205	152	79	57	96	165	273	92	26
STAT5B	NM_012448.3	Endogenous	630	672	55	541	381	967	423	537	695	456	312	229	128	433	195	994	437	1227	1231	440	491	560	765	465	581	896	173	666	849	428	796	515	1084	593	606	306	340	462	719	413	689	252	440	495	462	423	140
STAT6	NM_003153.3	Endogenous	4310	3447	349	3025	3408	4436	3340	4738	3883	2567	2116	1687	350	1587	1503	3713	3387	5346	5968	4933	4559	9590	2058	4845	2846	5355	426	5582	4030	3515	4656	2818	5398	5261	4209	4566	10096	8476	3067	1783	5158	2250	5139	3194	4368	4910	1168
SYCP1	NM_003176.2	Endogenous	21	12	13	20	27	20	20	21	10	7	26	7	9	8	19	23	18	21	25	22	19	42	38	16	12	22	8	27	14	13	20	9	34	22	20	19	15	14	25	11	7	8	8	19	20	20	13
SYK	NM_003177.3	Endogenous	1027	565	47	370	566	958	876	262	1234	379	302	92	24	358	178	817	238	606	515	661	293	483	5916	381	347	1584	104	1575	573	709	401	184	647	393	743	338	210	1198	865	535	395	112	150	444	565	263	81
SYT17	NM_016524.2	Endogenous	86	44	12	16	43	111	58	70	53	147	20	30	11	59	77	55	49	278	302	76	68	117	195	18	39	207	18	186	191	32	82	25	96	37	119	83	43	28	97	68	19	8	11	22	61	23	4
TAB1	NM_153497.2	Endogenous	598	468	25	329	439	531	492	633	472	374	149	225	61	223	241	530	535	605	1119	725	273	551	592	498	391	429	91	691	609	650	569	413	1343	720	324	1020	686	875	642	359	577	1116	700	515	763	721	139
TAL1	NM_003189.2	Endogenous	36	54	15	53	23	99	70	71	51	28	59	34	32	31	27	117	66	99	95	55	53	32	41	28	75	49	9	40	30	25	163	115	35	94	49	27	21	53	38	33	53	14	32	17	94	31	10
TANK	NM_004180.2	Endogenous	1627	1461	153	1406	1926	2263	1385	2194	1507	1727	673	440	145	1079	340	1632	1211	1596	1995	1374	1037	2558	1560	1719	1068	2326	377	1609	2544	1231	1351	1121	2493	1559	1690	1016	974	1531	2774	1068	1950	721	922	1214	1824	837	371
TAP1	NM_000593.5	Endogenous	435	1777	406	485	1698	1385	1432	375	740	2233	1289	312	68	629	396	766	898	887	1033	503	402	1672	6477	601	542	1451	392	708	732	2113	648	708	1124	560	910	377	285	905	1165	881	510	420	740	1214	1506	1680	280
TAP2	NM_000544.3	Endogenous	489	1480	293	400	1264	1570	943	358	664	1784	872	237	54	481	406	736	552	1193	887	560	449	2589	3512	672	566	1594	182	881	839	1211	623	688	1055	852	952	719	465	1504	1524	642	1352	1011	551	961	1766	1061	183
TAPBP	NM_003190.4	Endogenous	1645	2485	497	1603	3777	3394	3010	1259	2529	3765	2672	619	158	1437	1125	2898	2162	2456	4370	3328	1308	5158	5272	2900	2359	2978	355	2663	2193	2358	2363	2171	1840	2478	2187	2415	1413	2884	1788	1640	1606	1310	2215	1782	2931	2578	742
TARP	NM_001003799.1	Endogenous	36	78	28	101	44	442	237	48	282	105	98	81	16	48	59	197	205	46	124	214	80	77	179	155	75	279	55	112	64	220	102	45	54	68	254	44	27	65	73	178	29	57	38	346	226	132	18
TBK1	NM_013254.2	Endogenous	745	642	44	374	815	667	597	823	486	532	265	206	52	265	357	594	459	933	772	585	646	1193	1259	510	402	787	124	1010	994	880	504	678	1157	589	497	374	1278	756	794	536	760	279	339	775	545	592	185
TBX21	NM_013351.1	Endogenous	27	43	22	30	57	159	54	38	90	72	181	39	16	40	42	54	68	38	69	103	32	72	111	90	37	156	39	42	50	95	64	40	49	38	75	19	28	43	41	62	23	19	15	109	115	55	14
TCF7	NM_003202.2	Endogenous	72	180	12	156	42	447	351	137	467	66	152	39	13	76	59	205	183	46	301	315	74	197	1091	100	111	800	35	131	78	222	181	40	38	99	1016	114	80	190	201	149	67	184	41	141	606	85	228
TFE3	NM_006521.3	Endogenous	54	55	12	44	27	54	59	33	41	34	42	9	9	30	33	45	36	40	36	61	34	68	51	27	28	47	12	43	63	52	29	41	37	47	67	35	40	29	49	32	68	13	33	44	33	27	4
TFEB	NM_007162.2	Endogenous	107	226	17	97	81	255	137	92	198	90	77	55	26	57	55	174	165	154	218	220	81	218	209	82	218	272	44	143	140	96	169	117	95	134	240	189	63	321	224	104	99	38	110	117	181	72	66
TFRC	NM_003234.1	Endogenous	4244	1754	192	945	1268	2373	924	1967	2268	2572	1661	273	89	914	446	1112	533	1152	2604	1410	1053	2152	3358	1299	1230	1861	463	30323	11648	8009	1352	12263	43680	2632	836	11890	4172	23321	8691	1435	1676	440	299	3321	1003	1300	1642
TGFB1	NM_000660.3	Endogenous	2043	2515	385	705	1404	2830	1089	1133	1979	1165	1651	324	95	1037	593	2089	1391	2139	1884	967	2131	2002	1927	2055	1539	1180	348	4209	3509	1127	1529	2079	1141	1417	1435	4508	1648	2245	3174	1336	469	394	619	888	2003	780	232
TGFB2	NM_003238.2	Endogenous	161	308	15	322	707	79	212	127	58	468	165	95	54	239	29	290	282	467	563	585	193	1443	274	178	587	204	8	78	635	226	155	329	343	140	95	565	103	85	447	136	62	15	20	11	98	28	8
THBD	NM_000361.2	Endogenous	2703	3991	151	1714	237	974	718	507	979	253	1706	158	147	148	214	771	621	823	623	777	558	665	543	1123	1964	901	21	5518	7122	548	1654	1134	257	2466	451	2550	915	1225	2409	447	395	87	231	229	904	205	62
THBS1	NM_003246.2	Endogenous	7294	9167	43	8972	6388	9131	4344	4999	6558	4050	9125	181	314	3132	3135	12618	4341	15300	3695	1874	2684	3532	2710	5990	3136	1043	197	3878	7604	2229	3025	6977	4441	1995	1490	1462	1584	1446	5006	2652	1065	309	725	720	1520	1672	272
THY1	NM_006288.2	Endogenous	1907	2256	29	644	1495	2527	1354	2242	958	1111	357	88	231	1125	536	5476	2442	7400	1566	629	3031	888	1516	2108	3146	624	206	1915	1566	1053	953	5152	1484	1247	1038	720	969	1778	1357	1187	1421	204	582	363	1448	877	111
TICAM1	NM_014261.1	Endogenous	577	426	176	251	237	408	296	341	285	196	355	54	25	133	69	305	212	527	387	280	262	575	452	614	216	192	43	582	304	438	192	335	467	471	307	628	337	571	436	133	512	173	126	265	251	243	96
TICAM2	NM_021649.4	Endogenous	173	265	16	101	269	380	181	98	225	344	79	54	26	176	65	458	140	420	170	93	242	492	153	82	170	234	46	172	203	122	164	245	280	284	277	96	105	276	314	217	119	51	60	86	139	107	34
TIGIT	NM_173799.2	Endogenous	61	112	22	67	61	286	127	38	240	174	67	34	13	63	58	127	87	26	107	76	37	91	164	81	72	447	49	109	103	298	89	37	86	78	265	27	29	41	40	111	26	43	22	271	170	142	22
TIRAP	NM_148910.2	Endogenous	275	314	33	185	185	376	277	297	347	174	171	79	37	143	102	380	243	313	395	399	268	423	444	311	235	275	42	350	236	180	255	241	459	259	304	182	197	304	330	169	354	139	241	274	349	276	108
TLR1	NM_003263.3	Endogenous	412	541	62	328	1261	594	421	339	767	646	311	199	37	367	113	842	204	543	539	291	415	968	424	294	332	980	182	283	394	440	561	312	260	341	824	192	77	300	856	497	249	331	326	418	583	228	64
TLR10	NM_030956.2	Endogenous	22	55	27	110	26	123	70	48	202	43	33	18	22	43	43	133	87	35	150	67	30	73	52	43	45	920	37	42	43	72	63	34	55	57	327	27	28	33	48	86	16	46	17	26	138	38	16
TLR2	NM_003264.3	Endogenous	593	1109	158	580	1129	717	424	191	468	521	925	119	33	457	130	751	413	739	785	480	384	957	394	565	479	248	105	514	987	320	430	336	481	521	859	192	125	361	1151	516	72	79	89	416	443	210	30
TLR3	NM_003265.2	Endogenous	72	149	40	109	195	130	111	45	151	290	34	63	26	61	23	166	131	123	61	131	36	301	114	109	96	118	71	39	134	97	131	64	328	111	232	45	59	49	98	84	533	31	19	45	117	69	38
TLR4	NM_138554.2	Endogenous	798	647	57	371	414	1187	459	334	841	483	631	175	107	232	172	831	242	702	479	349	626	700	427	373	614	594	105	379	276	444	564	359	328	331	504	56	265	150	617	328	200	92	380	516	604	309	71
TLR5	NM_003268.3	Endogenous	142	107	17	150	96	142	60	120	127	63	37	95	15	42	22	194	68	115	443	183	74	134	83	97	144	43	11	90	121	174	205	43	97	232	136	650	87	164	168	63	38	24	26	56	99	31	10
TLR6	NM_006068.2	Endogenous	290	207	8	71	173	199	152	51	219	166	83	29	12	86	41	176	91	130	218	74	82	182	75	64	75	462	33	89	101	109	127	50	100	77	200	28	24	35	147	98	29	94	103	79	164	41	13
TLR7	NM_016562.3	Endogenous	61	36	15	54	41	95	63	45	96	85	47	20	11	43	20	154	59	83	59	54	49	187	84	34	90	137	18	41	34	59	62	36	44	40	157	23	21	48	91	43	34	29	30	55	123	53	15
TLR8	NM_016610.2	Endogenous	45	96	34	49	148	281	54	41	295	126	100	50	22	57	29	240	39	62	55	82	193	147	105	140	109	92	52	66	58	58	92	57	31	59	103	27	19	36	131	95	24	14	30	277	109	58	19
TLR9	NM_017442.2	Endogenous	22	21	11	31	30	60	39	67	67	24	25	12	12	21	38	61	40	37	53	28	40	58	51	48	28	145	14	31	38	38	20	51	20	33	112	31	48	38	26	32	31	15	11	23	78	21	16
TMEFF2	NM_016192.2	Endogenous	11	10	10	19	15	18	14	17	13	14	19	7	9	14	7	20	19	20	23	34	17	36	41	21	15	11	11	20	12	15	20	14	27	21	26	29	26	17	65	12	42	10	10	9	16	12	8
TNF	NM_000594.2	Endogenous	40	72	37	128	424	261	101	45	185	162	54	55	9	144	9	214	29	96	55	94	46	174	73	66	85	481	45	45	25	75	96	67	73	60	418	24	19	56	67	100	36	14	41	109	108	36	15
TNFAIP3	NM_006290.2	Endogenous	917	1733	209	2568	1394	968	956	569	1012	724	3554	302	67	435	429	637	608	223	1426	310	440	503	987	821	1125	1136	126	1424	907	2131	714	859	394	891	872	1618	339	1080	1231	952	2181	225	148	1680	1278	386	367
TNFRSF10B	NM_003842.3	Endogenous	388	453	43	378	350	792	362	424	249	240	458	91	48	326	106	506	382	505	1066	613	379	484	366	575	521	326	48	894	635	514	349	281	470	203	447	688	146	700	523	349	43	194	137	309	462	598	236
TNFRSF10C	NM_003841.3	Endogenous	67	287	150	253	44	929	277	198	372	64	267	44	27	196	120	173	122	594	743	420	245	217	90	484	234	313	71	127	136	70	300	120	78	105	524	56	52	117	144	130	32	41	27	77	126	38	22
TNFRSF11A	NM_003839.2	Endogenous	60	70	13	127	87	124	98	43	149	83	62	35	17	95	27	159	52	207	387	169	84	287	42	179	96	124	11	72	92	92	97	48	115	148	143	78	98	107	191	55	27	20	115	20	51	65	16
TNFRSF11B	NM_002546.2	Endogenous	111	133	6	36	226	60	57	22	63	124	57	12	1	47	21	125	125	73	43	10	12	142	1627	84	58	95	13	94	61	37	125	88	113	51	45	10	19	23	71	54	72	13	18	17	20	13	226
TNFRSF12A	NM_016639.1	Endogenous	196	459	15	155	150	341	217	102	126	114	375	15	19	123	90	168	184	636	777	93	290	547	192	239	182	129	11	214	238	52	75	179	115	200	400	713	182	234	314	113	134	75	21	162	124	114	32
TNFRSF13B	NM_012452.2	Endogenous	18	18	7	50	9	95	27	15	200	12	20	12	5	17	28	50	74	18	148	48	22	33	46	42	21	228	11	29	16	55	21	14	25	46	152	23	18	17	16	29	8	26	12	13	96	24	15
TNFRSF13C	NM_052945.3	Endogenous	127	61	13	213	44	278	73	38	504	39	152	21	3	38	144	116	147	55	387	60	37	43	183	43	22	1869	22	199	87	202	47	49	193	172	461	131	100	289	172	161	171	108	109	137	463	69	43
TNFRSF14	NM_003820.2	Endogenous	540	570	81	681	1105	1153	748	604	1500	907	559	436	63	479	271	779	705	570	1284	929	636	1247	793	937	649	1129	123	663	587	686	952	486	561	755	1092	174	195	499	371	883	6450	3682	4313	4247	3359	4605	1324
TNFRSF17	NM_001192.2	Endogenous	59	123	13	213	12	565	115	109	520	82	38	106	13	87	195	192	94	43	161	246	17	87	156	284	28	495	48	88	114	195	134	37	35	210	106	137	201	46	31	181	18	20	38	95	380	44	15
TNFRSF18	NM_004195.2	Endogenous	426	155	36	92	79	533	124	60	492	386	130	39	7	115	68	173	193	98	206	65	305	350	257	460	138	158	25	572	149	436	166	64	172	250	262	632	239	729	632	234	48	16	43	190	186	56	17
TNFRSF1A	NM_001065.2	Endogenous	1838	2599	387	1408	2136	2495	1318	2437	1662	1472	1844	435	263	907	1105	2409	1668	3338	3496	3822	2963	5912	874	2414	1947	865	124	2491	3408	1958	2259	1883	1543	2490	1337	5044	2019	2651	3478	2774	1223	371	739	991	1626	1241	240
TNFRSF1B	NM_001066.2	Endogenous	235	583	106	298	412	455	312	264	578	340	595	98	67	253	200	463	262	286	393	273	298	602	864	195	428	542	90	332	318	427	532	277	143	270	585	62	65	176	332	269	140	93	124	409	478	233	141
TNFRSF4	NM_003327.2	Endogenous	64	68	10	30	85	102	151	117	136	89	90	13	6	149	50	191	74	205	159	92	196	104	82	221	95	141	16	118	67	104	45	31	48	140	243	54	48	29	60	58	47	27	29	226	106	86	21
TNFRSF8	NM_152942.2	Endogenous	34	47	22	28	36	71	38	30	43	40	31	17	10	28	36	139	47	61	57	36	38	74	58	42	65	91	9	57	37	56	38	43	62	46	64	20	26	32	56	58	23	17	19	40	67	19	10
TNFRSF9	NM_001561.4	Endogenous	39	65	15	56	130	217	155	67	124	141	139	26	4	64	33	85	66	27	70	52	43	162	133	120	64	346	33	75	56	132	35	27	64	82	153	47	19	32	71	67	30	18	11	117	71	58	15
TNFSF10	NM_003810.2	Endogenous	2132	7303	378	1030	3007	852	2715	906	924	3251	430	902	131	507	170	1591	781	1210	3934	1112	651	3423	963	1011	1059	1319	377	5733	1924	2261	2716	1051	54007	3925	1384	2570	1279	2725	1562	2368	262	125	270	508	1249	324	45
TNFSF11	NM_003701.2	Endogenous	20	71	15	21	153	58	42	74	72	19	15	9	11	31	12	83	119	59	102	39	25	46	86	24	50	154	11	41	41	30	8	32	26	21	74	37	25	19	38	22	15	8	6	10	18	6	5
TNFSF12	NM_003809.2	Endogenous	554	556	22	458	454	1114	582	460	1143	496	405	195	71	349	171	1118	617	885	880	906	546	1221	552	500	743	619	43	706	526	272	589	463	302	397	774	105	166	345	604	361	654	603	517	410	962	479	308
TNFSF13	NM_003808.3	Endogenous	107	122	18	85	83	297	193	148	352	134	159	32	10	64	86	261	76	140	180	352	237	585	194	158	194	101	7	187	80	79	137	68	45	162	366	74	54	247	200	66	47	57	89	189	286	145	16
TNFSF13B	NM_006573.4	Endogenous	232	351	36	190	1217	837	344	102	831	681	312	81	23	202	66	580	118	351	164	119	228	683	423	211	218	540	140	112	170	385	245	194	149	197	578	52	62	149	365	378	193	71	96	641	643	285	37
TNFSF14	NM_003807.3	Endogenous	34	147	21	145	47	67	158	110	100	92	173	36	29	42	35	465	124	34	109	166	118	442	59	355	187	97	14	98	64	107	235	72	42	154	172	47	41	45	56	118	29	17	20	34	91	40	9
TNFSF15	NM_001204344.1	Endogenous	70	47	20	232	216	466	293	147	434	82	170	73	13	294	82	153	80	484	202	206	98	96	76	103	69	476	12	73	108	333	79	159	65	134	672	37	24	231	75	86	33	19	57	146	273	59	20
TNFSF18	NM_005092.2	Endogenous	33	18	63	31	17	29	17	14	26	23	22	1	4	10	2	54	19	24	15	20	11	33	44	18	30	19	6	97	34	76	34	10	32	71	46	25	10	38	116	13	13	4	16	6	14	11	5
TNFSF4	NM_003326.2	Endogenous	359	188	21	65	151	202	101	106	163	235	83	29	14	59	50	581	95	314	154	58	80	191	212	237	212	101	20	211	176	148	68	93	307	147	112	43	62	94	134	202	68	40	60	42	76	107	20
TNFSF8	NM_001244.3	Endogenous	46	57	5	50	44	123	54	33	129	38	79	10	10	22	18	78	38	58	71	34	46	97	62	54	57	112	15	57	35	39	46	47	54	36	89	25	19	45	64	49	26	40	17	46	94	38	13
TOLLIP	NM_019009.2	Endogenous	810	1055	109	786	568	1001	535	773	842	503	325	286	71	853	197	806	546	925	1020	761	547	1049	621	906	417	757	121	1296	965	440	674	562	613	813	730	1078	1016	1152	1173	503	1369	678	953	431	733	759	313
TP53	NM_000546.2	Endogenous	349	1390	98	717	1240	1508	1168	503	883	241	200	231	59	261	115	894	867	2279	936	1037	1450	1820	1237	537	628	1979	58	2189	2951	294	790	1218	2522	1157	798	1257	302	694	2625	694	300	721	949	637	1194	1540	370
TPSAB1	NM_003294.3	Endogenous	1827	3235	20	3181	330	1400	2062	2356	1782	1622	1241	2528	356	2414	674	4239	3886	1330	2637	1320	473	628	576	1772	1671	778	7	2584	2500	1904	8684	230	40	415	790	221	294	1677	1415	1810	1815	88	393	61	1629	268	7
TPTE	NM_199259.2	Endogenous	75	28	28	25	22	33	38	22	17	16	15	14	18	13	172	34	132	21	33	33	27	49	979	51	32	37	14	41	28	15	25	21	74	27	46	27	156	25	218	19	1006	8	15	71	20	16	10
TRAF2	NM_021138.3	Endogenous	549	417	60	291	1329	886	620	783	531	822	328	162	38	398	504	473	267	1097	1156	713	379	1159	799	423	323	812	92	1213	853	912	464	613	1558	760	757	765	895	1199	816	402	543	392	532	641	532	772	306
TRAF3	NM_145725.1	Endogenous	620	615	55	313	712	604	470	485	502	516	506	197	38	381	296	531	376	451	816	511	683	710	1138	452	383	947	99	976	652	422	609	552	1440	696	609	973	479	943	886	456	299	369	312	468	633	583	94
TRAF6	NM_145803.1	Endogenous	548	360	20	256	240	397	364	576	307	256	211	108	35	181	132	426	197	393	467	355	256	439	438	450	234	295	43	607	284	329	279	389	650	637	385	391	490	343	741	190	440	188	378	279	493	403	129
TREM1	NM_018643.3	Endogenous	288	1063	238	232	421	949	594	3868	1331	534	919	12	33	521	627	974	1652	2581	714	822	729	1326	255	1743	744	322	65	69	315	105	100	310	142	31	230	41	97	30	801	141	13	55	18	73	327	24	19
TREM2	NM_018965.3	Endogenous	131	151	7	61	108	246	117	98	512	224	128	22	5	63	27	337	41	316	113	115	126	515	115	370	212	28	18	85	82	44	30	99	73	137	154	28	38	47	484	75	43	48	25	75	154	71	34
TTK	NM_003318.3	Endogenous	151	181	28	50	548	281	342	174	53	206	91	28	11	114	51	98	51	393	206	59	146	495	726	77	51	483	75	819	488	403	120	290	1939	305	60	173	513	659	601	113	227	38	77	148	65	155	57
TXK	NM_003328.1	Endogenous	19	35	11	39	31	49	28	32	64	20	24	9	9	20	16	41	14	41	33	43	27	51	34	36	24	71	5	45	16	23	30	24	32	46	82	11	18	50	44	27	17	18	7	26	42	22	27
TXNIP	NM_006472.1	Endogenous	4503	14561	368	5211	2689	16056	6262	4996	19508	3840	7149	4056	1800	2378	3391	11538	17859	5655	15537	12690	22263	10856	3383	10591	6737	10146	706	3370	2999	3758	10936	2545	4258	6186	10592	1761	4173	4237	5755	2956	3163	5482	2629	3883	18064	5545	1013
TYK2	NM_003331.3	Endogenous	728	584	61	467	722	1024	676	732	818	616	369	232	64	338	218	954	416	952	728	672	552	822	659	1018	507	760	127	797	596	759	611	583	1268	721	794	503	939	634	1072	404	771	151	426	362	678	597	172
UBC	NM_021009.3	Endogenous	79619	91313	12413	63217	45176	74802	37920	48540	56011	60891	46553	13901	5199	26730	21559	48580	34071	92995	92278	39630	44399	114738	64071	46143	49069	61101	10278	106775	153353	47582	41666	48622	165885	83222	45472	71359	49609	91188	120041	48586	67522	18310	22786	42146	57611	41943	10194
ULBP2	NM_025217.2	Endogenous	108	246	32	52	39	23	100	25	53	54	19	10	8	14	11	42	21	50	49	26	32	60	19	21	26	23	6	247	69	115	32	60	202	777	16	470	220	1101	403	250	86	13	30	12	48	18	5
USP9Y	NM_004654.3	Endogenous	47	81	6	124	234	140	15	117	144	9	43	111	31	9	27	19	120	266	85	16	49	75	13	93	105	198	7	58	555	143	15	76	44	96	194	30	86	41	27	129	5	77	1	8	11	9	4
VCAM1	NM_001078.3	Endogenous	248	607	5	394	1752	507	667	281	869	752	269	80	52	405	201	1422	420	975	881	150	151	436	701	475	717	1301	26	434	709	443	522	700	463	497	471	120	79	196	211	427	159	77	98	337	693	207	70
VEGFA	NM_001025366.1	Endogenous	1862	1456	313	1080	6652	7478	3618	6255	1493	1915	1903	218	146	4542	2104	1841	3907	8347	10264	7192	4998	2611	3318	4669	1619	856	327	3238	11196	1256	983	1445	4803	2860	552	1479	4547	4849	6884	3082	749	120	162	304	938	1966	262
VEGFC	NM_005429.2	Endogenous	261	695	12	157	507	353	204	270	194	271	661	60	78	101	82	438	176	373	426	137	100	438	273	135	422	196	28	216	233	91	425	331	424	506	214	221	98	74	285	290	143	52	56	87	131	74	33
XCL2	NM_003175.3	Endogenous	182	91	15	43	151	85	70	20	78	67	43	126	4	69	23	71	68	22	46	67	34	35	174	34	29	143	14	98	155	89	30	64	241	104	76	169	76	136	97	78	11	15	4	81	87	30	12
XCR1	NM_005283.2	Endogenous	30	50	19	37	14	71	38	32	45	21	19	18	5	9	16	40	62	31	31	39	12	35	31	26	14	64	14	33	21	33	32	32	28	49	63	26	24	61	175	32	20	9	5	20	42	18	6
YTHDF2	NM_001172828.1	Endogenous	1016	1209	104	829	810	1593	781	1008	1031	1036	526	272	94	728	274	1377	795	1941	1456	1107	1079	2340	2395	939	838	1060	195	1252	1699	562	960	1099	4122	1124	788	1302	1193	1827	2319	1052	2273	823	800	1509	840	1878	402
ZAP70	NM_001079.3	Endogenous	77	158	32	148	131	612	317	115	526	169	239	173	23	85	105	293	298	62	427	209	81	110	299	410	140	686	69	223	96	305	246	77	61	173	813	43	38	107	83	216	58	138	72	378	519	199	814
ZNF205	NM_001031686.1	Endogenous	97	118	14	41	96	101	136	63	52	61	46	32	13	37	65	99	82	167	187	137	83	128	141	63	77	73	11	106	94	55	77	64	226	133	97	98	143	105	159	57	168	49	72	63	78	71	39
ABCF1	NM_001090.2	Housekeeping	818	844	49	428	715	1258	563	471	637	984	438	169	82	411	317	600	400	2331	932	621	389	1717	2197	381	501	1028	90	981	1019	387	582	751	2730	619	387	608	431	1081	1354	435	993	494	1215	667	1037	1211	481
AGK	NM_018238.3	Housekeeping	507	470	41	345	484	856	303	437	375	608	372	129	48	250	148	443	209	820	561	341	425	803	501	396	293	565	109	1011	830	402	375	438	2281	580	306	443	694	1020	664	395	323	332	476	629	359	500	93
ALAS1	NM_000688.4	Housekeeping	445	401	110	310	481	936	444	590	819	314	302	145	69	223	231	517	277	774	512	681	446	1895	568	642	341	492	85	632	818	449	393	434	722	416	400	428	590	914	764	445	1101	432	308	1023	436	496	193
AMMECR1L	NM_001199140.1	Housekeeping	887	642	51	528	466	1128	580	617	508	546	335	193	69	452	174	752	560	1189	1094	720	471	754	1094	439	419	673	137	1664	1025	404	563	647	1919	869	545	599	1137	875	923	439	1774	984	794	1100	875	973	320
CC2D1B	NM_032449.2	Housekeeping	39	68	15	33	23	89	86	29	83	41	70	29	15	47	16	68	47	82	42	74	32	136	84	88	44	57	13	29	27	44	68	49	103	53	133	50	69	55	79	41	30	72	90	186	89	35	23
CNOT10	NM_001256741.1	Housekeeping	483	284	37	301	427	735	439	413	445	547	191	171	42	211	140	463	247	729	609	450	535	775	909	425	298	600	136	565	1040	272	419	338	866	392	330	585	455	561	756	345	1155	480	170	345	319	494	150
CNOT4	NM_001190848.1	Housekeeping	815	571	46	455	706	939	522	516	474	568	288	198	81	360	235	670	317	758	742	452	624	764	601	581	358	617	116	1197	933	492	504	573	1401	620	493	849	719	1055	560	438	329	302	379	389	682	498	139
COG7	NM_153603.3	Housekeeping	901	629	52	519	776	757	638	1241	587	801	287	496	81	423	314	1124	583	1398	2260	1002	413	620	1201	740	490	915	119	1345	877	536	1066	535	1592	939	723	722	1261	1022	800	528	822	351	481	474	601	561	208
DDX50	NM_024045.1	Housekeeping	514	464	41	311	418	989	466	405	414	498	173	158	57	219	183	640	370	1407	564	477	474	841	917	329	330	680	72	668	1235	316	432	400	1375	443	401	431	438	533	752	438	667	298	256	398	405	329	127
DHX16	NM_001164239.1	Housekeeping	456	391	38	216	286	691	429	371	390	387	196	144	32	171	270	335	300	1118	591	580	310	861	954	372	320	457	32	498	595	236	360	310	1112	390	384	258	359	512	566	187	674	421	486	437	530	521	204
DNAJC14	NM_032364.5	Housekeeping	355	290	34	206	338	445	391	381	256	315	256	127	34	205	288	293	238	602	431	383	302	992	673	179	182	412	60	480	556	244	310	345	888	336	237	206	281	307	389	165	372	206	313	369	290	327	102
EDC3	NM_001142443.1	Housekeeping	1531	879	54	571	844	1070	790	695	684	1442	321	287	86	561	491	909	605	1361	1350	1030	981	1204	2321	948	526	1036	227	1803	1775	901	792	982	2170	867	613	865	1352	1170	1850	716	1346	566	816	789	848	977	343
EIF2B4	NM_172195.3	Housekeeping	727	621	90	580	548	1306	478	790	817	601	355	248	96	379	320	835	498	2098	1310	694	821	1421	1579	543	435	677	166	1215	1647	438	672	555	1326	798	568	544	868	1076	1566	815	907	387	449	623	699	605	212
ERCC3	NM_000122.1	Housekeeping	376	331	35	200	223	521	418	381	303	360	145	143	40	215	221	305	307	541	567	450	361	370	607	279	224	394	60	1138	622	325	362	342	872	423	336	271	445	457	417	189	547	290	330	507	441	362	130
FCF1	NM_015962.4	Housekeeping	4006	2943	201	1529	3171	3262	3293	2906	2095	2346	2184	1032	229	1817	1573	2752	1903	4194	2802	2377	2391	4428	4519	2581	1560	4434	436	3191	4265	1750	2924	2074	5906	3439	2828	3391	4219	4186	4125	2013	2043	1055	1271	1785	2895	2383	504
G6PD	NM_000402.2	Housekeeping	3873	738	159	646	698	1201	1056	798	894	5973	1577	203	103	485	411	782	567	1118	4480	2076	689	9131	1146	556	892	9199	146	9965	12687	1047	711	2286	2806	4746	4510	1065	4276	3111	6521	606	618	442	630	2269	697	607	206
GPATCH3	NM_022078.2	Housekeeping	90	103	35	61	80	100	104	72	134	73	87	27	30	40	63	84	74	82	113	118	71	144	199	86	71	72	23	123	114	47	77	88	171	117	133	93	90	99	125	48	155	37	97	101	125	80	35
GUSB	NM_000181.1	Housekeeping	322	444	38	257	330	854	975	872	860	685	680	160	68	276	241	642	321	638	928	1081	372	1135	1219	597	476	376	109	773	478	266	480	562	1129	523	817	632	540	310	479	332	514	621	542	1298	680	763	231
HDAC3	NM_003883.2	Housekeeping	447	467	91	331	317	722	352	365	455	362	217	145	43	226	137	548	224	928	661	522	274	852	646	311	309	468	110	685	715	283	359	379	1972	688	589	485	716	644	983	364	374	258	347	310	465	479	118
HPRT1	NM_000194.1	Housekeeping	1544	908	60	530	540	1804	666	519	565	1944	382	153	59	528	480	574	300	1428	1365	322	769	1240	1954	272	500	3008	259	2685	4773	767	706	817	4142	1742	620	1121	884	2564	2955	1122	910	271	240	612	354	889	130
MRPS5	NM_031902.3	Housekeeping	2901	1022	115	701	1298	2705	839	1953	1102	1098	467	332	169	1005	498	1178	662	2063	1866	1361	1296	1899	1808	989	619	1320	398	1251	1892	678	1242	1274	3449	1493	778	1265	1492	2247	1762	1035	1410	580	831	1267	1011	1437	302
MTMR14	NM_022485.3	Housekeeping	586	508	63	449	650	1383	731	852	979	653	509	214	81	360	241	667	333	702	802	673	693	1618	891	591	472	1088	185	869	816	347	577	486	691	554	671	526	413	546	847	457	1097	772	347	812	805	681	285
NOL7	NM_016167.3	Housekeeping	794	635	59	497	593	1464	481	964	687	638	285	170	56	426	196	628	293	2273	654	657	541	1607	1710	555	437	886	196	733	1405	268	543	688	4340	552	330	469	598	459	1346	446	856	469	478	682	557	808	395
NUBP1	NM_001278506.1	Housekeeping	137	157	17	145	133	223	123	137	180	172	78	69	18	93	53	231	82	371	177	202	108	308	201	91	142	301	28	143	210	108	146	83	222	138	161	96	82	179	253	117	133	58	107	110	117	135	40
POLR2A	NM_000937.2	Housekeeping	2767	2784	248	2377	1866	2821	1341	2203	1416	1871	1178	961	179	1207	1224	2296	1934	3744	3554	2608	3071	2545	4833	1169	1799	1905	319	5879	3940	1207	2623	2355	3526	2292	1417	2816	3028	7368	3592	1493	1856	2010	1947	2154	2433	2588	739
PPIA	NM_021130.2	Housekeeping	444	735	68	521	266	1272	596	346	498	466	345	224	65	334	220	529	378	1335	888	676	357	934	1084	272	270	1267	126	1065	637	511	571	469	2191	803	709	747	759	839	911	289	1043	797	580	1424	823	703	350
PRPF38A	NM_032864.3	Housekeeping	472	472	40	459	417	647	475	483	474	586	315	158	56	382	134	543	361	893	778	408	395	995	1608	423	342	672	119	622	683	261	505	473	1752	483	465	493	709	804	763	490	447	288	348	679	540	441	182
SAP130	NM_024545.3	Housekeeping	748	445	27	315	333	839	538	473	429	403	177	159	64	291	182	489	208	1028	632	310	459	695	869	226	306	715	121	1117	1068	391	388	388	1248	626	414	536	557	781	892	410	682	245	399	536	418	595	197
SDHA	NM_004168.1	Housekeeping	1294	732	57	480	676	1563	799	740	595	617	468	269	164	547	380	736	404	1283	1253	805	900	1712	1642	616	698	1554	125	1150	1435	733	742	1070	3083	837	716	1072	792	2952	1747	630	603	1029	518	667	606	842	196
SF3A3	NM_006802.2	Housekeeping	894	948	56	710	609	1566	1584	531	877	700	753	338	111	392	453	1230	806	1349	929	1315	1530	1429	1847	1004	347	865	102	697	1148	783	784	973	2700	814	1100	884	1518	1159	1188	490	1845	763	927	1184	1466	1296	349
TBP	NM_001172085.1	Housekeeping	470	437	40	253	289	490	371	695	335	310	138	139	55	252	77	405	245	647	612	252	332	482	557	292	224	598	89	830	594	270	431	363	795	529	231	277	494	397	747	256	328	110	272	341	430	238	85
TLK2	NM_006852.2	Housekeeping	655	633	52	353	649	1010	537	583	504	453	336	172	50	420	378	512	362	1230	1033	606	628	735	1139	384	428	615	112	1125	949	493	454	507	1902	881	514	424	747	843	1496	360	854	362	479	612	614	525	159
TMUB2	NM_024107.2	Housekeeping	642	657	72	466	576	1313	534	578	715	488	434	264	77	518	317	809	464	1456	1080	831	537	1073	950	411	397	728	104	1059	948	447	653	484	2662	1172	687	594	566	691	1162	364	805	319	543	643	690	699	197
TRIM39	NM_021253.3	Housekeeping	165	133	19	96	139	231	160	155	133	122	78	58	23	83	60	131	76	283	146	165	91	245	223	114	67	194	20	85	166	85	153	83	299	123	99	91	126	148	149	70	121	105	114	86	203	171	64
TUBB	NM_178014.2	Housekeeping	3505	3403	178	1504	2138	5503	3140	1387	2267	3333	1415	387	159	1401	991	3227	1572	8217	2015	2098	1533	10346	8327	964	1776	4187	343	4802	6984	1932	1805	2547	10104	1988	1257	2665	1711	3488	4941	3004	4740	2709	3223	2662	3541	4862	1704
USP39	NM_001256725.1	Housekeeping	235	255	23	181	250	655	205	224	250	321	132	44	27	178	58	237	131	413	432	159	242	472	463	179	183	435	75	661	621	212	209	202	1780	199	208	261	539	865	828	287	362	114	126	204	169	267	87
ZC3H14	NM_001160103.1	Housekeeping	758	491	54	643	690	1092	980	561	505	587	381	319	74	406	655	805	333	1097	654	517	612	989	1066	506	394	925	133	790	1485	571	787	820	1156	949	495	702	789	708	685	485	754	403	769	644	951	878	387
ZKSCAN5	NM_014569.3	Housekeeping	86	76	7	63	50	163	77	76	78	79	44	38	21	74	41	122	49	172	116	95	71	132	168	69	70	267	44	201	139	114	93	90	238	115	92	113	103	158	296	65	78	66	84	124	63	88	30
ZNF143	NM_003442.5	Housekeeping	360	365	23	232	270	439	278	607	325	215	114	100	40	212	93	362	193	494	380	222	295	484	460	334	206	471	90	319	576	245	306	243	581	258	244	286	318	322	414	248	290	145	188	251	267	220	88
ZNF346	NM_012279.2	Housekeeping	147	183	32	122	148	283	209	184	196	151	70	116	30	78	47	318	134	384	204	229	128	282	209	195	108	276	30	151	142	101	197	192	708	421	400	143	322	215	311	104	204	87	130	155	249	187	49
NEG_A	ERCC_00096.1	Negative	17	7	13	11	12	31	12	14	10	11	11	10	9	5	17	22	19	23	23	17	17	13	30	18	25	17	11	26	9	11	14	21	19	24	20	14	21	15	17	2	6	4	3	7	14	11	5
NEG_B	ERCC_00041.1	Negative	17	15	15	14	19	24	18	12	24	16	11	6	4	13	7	20	19	16	26	20	15	24	30	20	22	19	8	25	25	10	17	17	26	25	25	15	22	22	30	10	11	4	6	6	18	22	9
NEG_C	ERCC_00019.1	Negative	33	33	14	23	29	45	37	27	21	17	28	15	19	17	15	25	24	34	28	24	17	33	31	23	26	20	11	21	16	31	25	35	43	29	31	16	21	20	23	14	7	9	14	9	35	15	8
NEG_D	ERCC_00076.1	Negative	8	15	10	19	11	20	10	12	10	5	7	7	6	8	5	15	15	11	14	15	14	26	23	14	7	5	12	11	10	10	21	9	9	14	20	13	21	10	13	3	3	3	3	7	10	10	1
NEG_E	ERCC_00098.1	Negative	16	16	16	14	19	27	25	22	14	11	14	10	12	12	13	32	25	33	29	29	26	28	26	30	25	16	1	24	22	14	18	22	20	36	14	24	32	22	26	11	9	3	6	12	16	14	8
NEG_F	ERCC_00126.1	Negative	16	17	17	17	21	21	14	16	13	13	12	9	9	11	11	23	24	19	22	22	14	14	15	16	13	11	10	20	18	13	14	32	19	19	15	19	17	22	13	5	11	5	6	5	19	8	14
NEG_G	ERCC_00144.1	Negative	4	12	12	9	9	12	15	10	10	4	5	5	11	5	4	6	16	14	10	8	11	20	16	12	10	6	5	5	8	9	5	6	8	12	13	11	13	6	16	4	9	4	1	4	5	4	1
NEG_H	ERCC_00154.1	Negative	12	21	19	14	17	19	15	12	21	12	18	10	10	12	14	26	11	10	15	31	17	23	24	17	7	17	6	17	9	14	13	18	19	21	24	18	15	10	23	11	11	2	4	6	8	12	4
POS_A	ERCC_00117.1	Positive	19307	19463	42969	22330	20963	25139	24226	21316	18248	14015	15909	17889	26257	19053	22085	24161	33787	22014	26156	39720	36536	27977	41725	38534	37997	16755	17613	29962	15339	20048	18746	27202	35821	51442	38820	41309	49124	28871	29328	13722	12934	11489	12703	15543	24684	16473	14249
POS_B	ERCC_00112.1	Positive	6298	6220	11937	7045	6621	7708	7463	7145	5649	4322	5105	5727	8356	6005	7291	7631	10469	6746	7955	11698	10189	7959	10343	10186	9536	5431	5723	8541	5037	6544	6121	8534	10056	12852	10166	10797	12172	7590	7155	4150	3454	3312	3457	4222	6357	4654	4771
POS_C	ERCC_00002.1	Positive	2147	2116	3927	2543	2482	2586	2623	2425	1844	1499	1734	2189	3106	2237	2380	2365	3316	2181	2628	3664	3439	2561	3532	3312	3237	1831	2097	2700	1771	2156	2086	2646	3241	4378	3321	3629	3976	2487	2572	1389	1133	1041	1193	1390	1982	1325	1481
POS_D	ERCC_00092.1	Positive	440	415	978	558	522	577	548	537	390	295	352	434	622	474	462	531	751	510	560	860	836	586	806	767	746	374	443	656	426	478	399	635	760	1041	762	772	931	590	531	288	265	217	265	320	436	352	312
POS_E	ERCC_00035.1	Positive	55	77	140	102	85	103	82	79	62	42	51	54	97	58	79	86	124	95	115	163	142	120	168	165	142	70	70	133	51	60	70	101	127	188	128	152	160	113	113	45	36	45	44	61	100	53	48
POS_F	ERCC_00034.1	Positive	36	44	72	39	52	83	56	54	43	25	35	29	53	35	61	72	77	71	70	80	81	56	61	63	72	39	34	82	43	66	41	60	69	80	70	43	88	63	42	30	32	21	26	29	40	28	31
[truncated: 18 more columns]

## Sheet: clinical data
RCC_FILES	AGE	PREV.LINES	BRAF	NRAS	EGFR	ALK	BIOPSY	SMOKING	ECOG	SEX	CANCER	CANCER2	DRUG	BEST.RESP	Response	PFSE	PFS
A1	75	1	NA	NA	NA	NA	ARCHIVAL	FS	0	M	SqH&N	HEADNECK	NIVOLUMAB	SD	RC_RP_SD	1	2.73333
A2	72	1	NA	NA	NA	NA	ARCHIVAL	FS	1	M	SqH&N	HEADNECK	NIVOLUMAB	PD	PD	1	2
A3	57	1	NA	NA	NA	NA	BASELINE	CS	1	M	SqH&N	HEADNECK	NIVOLUMAB	SD	RC_RP_SD	0	1.8
A4	50	1	NA	NA	NA	NA	BASELINE	FS	1	M	SqH&N	HEADNECK	NIVOLUMAB	CR	RC_RP_SD	0	13.5667
A5	59	1	NA	NA	NA	NA	BASELINE	FS	1	M	SqH&N	HEADNECK	NIVOLUMAB	PR	RC_RP_SD	0	12.1667
A6	57	1	NA	NA	WT	NEG	ARCHIVAL	FS	1	M	Non-SqCLC	ADENO	NIVOLUMAB	CR	RC_RP_SD	0	25.7333
A7	59	3	NA	NA	MUT	NEG	ARCHIVAL	NS	1	F	Non-SqCLC	ADENO	NIVOLUMAB	PD	PD	1	1
A8	55	4	NA	NA	WT	NEG	ARCHIVAL	FS	1	M	Non-SqCLC	ADENO	NIVOLUMAB	PD	PD	1	0
A9	79	1	NA	NA	WT	NEG	ARCHIVAL	FS	1	M	Non-SqCLC	ADENO	NIVOLUMAB	SD	RC_RP_SD	0	1.93333
A10	46	2	NA	NA	WT	NEG	ARCHIVAL	FS	1	F	Non-SqCLC	ADENO	NIVOLUMAB	PD	PD	1	2.8
A11	62	2	NA	NA	WT	NEG	ARCHIVAL	CS	1	M	Non-SqCLC	ADENO	NIVOLUMAB	SD	RC_RP_SD	0	2.86667
A12	72	1	NA	NA	WT	NEG	ARCHIVAL	FS	0	M	Non-SqCLC	ADENO	PEMBROLIZUMAB	SD	RC_RP_SD	1	3.76667
A13	46	2	NA	MUT	WT	NEG	ARCHIVAL	CS	0	M	Non-SqCLC	ADENO	NIVOLUMAB	PR	RC_RP_SD	0	4.9
A14	60	1	NA	NA	WT	NA	ARCHIVAL	CS	1	F	Non-SqCLC	ADENO	NIVOLUMAB	PD	PD	1	3.2
A15	69	6	NA	NA	WT	NEG	ARCHIVAL	FS	1	M	Non-SqCLC	ADENO	NIVOLUMAB	SD	RC_RP_SD	0	1.86667
A16	44	0	NA	NA	WT	NEG	BASELINE	NS	1	F	Non-SqCLC	ADENO	NIVOLUMAB	PD	PD	1	0.966667
A17	53	0	NA	NA	WT	NEG	BASELINE	FS	0	M	Non-SqCLC	ADENO	NIVOLUMAB	SD	RC_RP_SD	0	12.1
A18	51	3	NA	NA	WT	NEG	BASELINE	FS	1	M	Non-SqCLC	ADENO	PEMBROLIZUMAB	PD	PD	1	1.4
A19	52	0	NA	NA	WT	NEG	BASELINE	FS	0	M	Non-SqCLC	ADENO	NIVOLUMAB	PR	RC_RP_SD	1	6.3
A20	46	1	NA	NA	WT	NEG	BASELINE	NS	1	F	Non-SqCLC	ADENO	NIVOLUMAB	SD	RC_RP_SD	1	20.7
A21	61	2	NA	NA	WT	NEG	BASELINE	CS	1	M	Non-SqCLC	ADENO	PEMBROLIZUMAB	PR	RC_RP_SD	1	18.7
A22	66	0	NA	NA	WT	NEG	BASELINE	CS	1	M	Non-SqCLC	ADENO	PEMBROLIZUMAB	PD	PD	1	0.7
A23	47	1	NA	NA	WT	NEG	BASELINE	CS	1	F	Non-SqCLC	ADENO	PEMBROLIZUMAB	PD	PD	1	0.7
A24	61	2	NA	NA	WT	NEG	BASELINE	FS	1	M	Non-SqCLC	ADENO	PEMBROLIZUMAB	PR	RC_RP_SD	1	6.86667
A25	42	1	NA	NA	WT	NEG	BASELINE	FS	1	M	Non-SqCLC	ADENO	PEMBROLIZUMAB	SD	RC_RP_SD	1	3.46667
A26	70	1	NA	NA	WT	NEG	BASELINE	CS	1	M	Non-SqCLC	ADENO	PEMBROLIZUMAB	PR	RC_RP_SD	0	4.9
A27	61	2	NA	WT	WT	NEG	BASELINE	CS	0	F	Non-SqCLC	ADENO	NIVOLUMAB	PD	PD	1	2.8
A28	69	1	NA	NA	WT	NEG	ARCHIVAL	FS	0	M	SqCLC	SQUAMOUS	PEMBROLIZUMAB	PD	PD	1	1.36667
A29	73	2	NA	NA	NA	NA	ARCHIVAL	FS	1	M	SqCLC	SQUAMOUS	NIVOLUMAB	PD	PD	1	0
A30	67	3	NA	NA	NA	NA	ARCHIVAL	CS	0	M	SqCLC	SQUAMOUS	NIVOLUMAB	SD	RC_RP_SD	1	5.56667
A31	70	1	NA	NA	NA	NA	ARCHIVAL	FS	1	F	SqCLC	SQUAMOUS	NIVOLUMAB	PD	PD	1	2.6
A32	56	3	NA	NA	WT	NEG	BASELINE	CS	1	M	SqCLC	SQUAMOUS	PEMBROLIZUMAB	PR	RC_RP_SD	1	7.66667
A33	45	1	NA	NA	WT	NEG	BASELINE	FS	1	M	SqCLC	SQUAMOUS	PEMBROLIZUMAB	PD	PD	1	2.8
A34	53	1	NA	NA	WT	NEG	BASELINE	FS	0	M	SqCLC	SQUAMOUS	PEMBROLIZUMAB	PR	RC_RP_SD	0	26.1
A35	42	4	NA	NA	WT	NEG	BASELINE	FS	0	M	SqCLC	SQUAMOUS	PEMBROLIZUMAB	SD	RC_RP_SD	1	12.3333
A36	76	0	NA	NA	WT	NEG	BASELINE	FS	0	M	SqCLC	SQUAMOUS	PEMBROLIZUMAB	PR	RC_RP_SD	0	23.4333
A37	45	3	NA	NA	WT	NEG	BASELINE	FS	1	M	SqCLC	SQUAMOUS	PEMBROLIZUMAB	PD	PD	1	2.3
A38	83	0	NA	NA	WT	NEG	BASELINE	FS	1	M	SqCLC	SQUAMOUS	PEMBROLIZUMAB	SD	RC_RP_SD	1	6.13333
A39	54	0	NA	NA	WT	NEG	BASELINE	FS	0	M	SqCLC	SQUAMOUS	PEMBROLIZUMAB	SD	RC_RP_SD	1	4.63333
A40	66	2	NA	NA	NA	NA	BASELINE	FS	1	M	SqCLC	SQUAMOUS	NIVOLUMAB	SD	RC_RP_SD	0	2.06667
A41	68	0	WT	WT	NA	NA	ARCHIVAL	NS	1	F	SKCM	MELANOMA	PEMBROLIZUMAB	PD	PD	1	1.83333
A42	59	0	WT	MUT	NA	NA	ARCHIVAL	FS	1	M	SKCM	MELANOMA	PEMBROLIZUMAB	PD	PD	1	1.13333
A43	70	1	WT	WT	NA	NA	ARCHIVAL	NS	1	M	SKCM	MELANOMA	PEMBROLIZUMAB	PD	PD	1	2.53333
A44	83	0	WT	NA	NA	NA	ARCHIVAL	NS	1	F	SKCM	MELANOMA	PEMBROLIZUMAB	SD	RC_RP_SD	1	3.96667
A45	80	2	WT	NA	NA	NA	ARCHIVAL	NS	1	M	SKCM	MELANOMA	PEMBROLIZUMAB	PD	PD	1	2.56667
A46	50	3	WT	WT	NA	NA	ARCHIVAL	NS	1	M	SKCM	MELANOMA	PEMBROLIZUMAB	PD	PD	1	3.16667
A47	64	0	MUT	NA	NA	NA	ARCHIVAL	NS	1	M	SKCM	MELANOMA	NIVOLUMAB	PD	PD	1	2.56667
A48	58	1	WT	NA	NA	NA	ARCHIVAL	NS	0	M	SKCM	MELANOMA	PEMBROLIZUMAB	PD	PD	1	2.1
A49	61	2	MUT	WT	NA	NA	ARCHIVAL	NS	0	F	SKCM	MELANOMA	NIVOLUMAB	PD	PD	1	2.63
A50	48	2	MUT	NA	NA	NA	ARCHIVAL	NS	2	M	SKCM	MELANOMA	PEMBROLIZUMAB	PD	PD	1	1.46667
A51	47	3	MUT	NA	NA	NA	ARCHIVAL	NS	1	M	SKCM	MELANOMA	PEMBROLIZUMAB	SD	RC_RP_SD	0	6.3
A52	43	0	WT	NA	NA	NA	ARCHIVAL	NS	0	M	SKCM	MELANOMA	PEMBROLIZUMAB	PR	RC_RP_SD	0	20.9667
A53	43	3	MUT	NA	NA	NA	ARCHIVAL	CS	1	M	SKCM	MELANOMA	PEMBROLIZUMAB	PR	RC_RP_SD	1	7.3
A54	47	3	MUT	NA	NA	NA	ARCHIVAL	NS	0	M	SKCM	MELANOMA	PEMBROLIZUMAB	PR	RC_RP_SD	0	16.4
A55	74	1	MUT	NA	NA	NA	ARCHIVAL	NS	1	M	SKCM	MELANOMA	PEMBROLIZUMAB	PR	RC_RP_SD	1	6.5
A56	54	2	WT	WT	NA	NA	ARCHIVAL	NS	2	M	SKCM	MELANOMA	NIVOLUMAB	PR	RC_RP_SD	0	8.36667
A57	68	0	WT	NA	NA	NA	BASELINE	NS	1	F	SKCM	MELANOMA	PEMBROLIZUMAB	PR	RC_RP_SD	1	2.56667
A58	79	0	WT	WT	NA	NA	BASELINE	NS	1	M	SKCM	MELANOMA	NIVOLUMAB	PR	RC_RP_SD	0	32.2
A59	76	1	WT	NA	NA	NA	BASELINE	NS	1	F	SKCM	MELANOMA	PEMBROLIZUMAB	PD	PD	1	2.6
A60	59	5	WT	NA	NA	NA	BASELINE	CS	1	M	SKCM	MELANOMA	PEMBROLIZUMAB	PD	PD	1	2.4
A61	55	0	WT	NA	NA	NA	BASELINE	CS	1	M	SKCM	MELANOMA	PEMBROLIZUMAB	PD	PD	1	1.7
A62	41	0	MUT	NA	NA	NA	BASELINE	CS	0	M	SKCM	MELANOMA	PEMBROLIZUMAB	PR	RC_RP_SD	0	22.4333
A63	40	2	WT	WT	NA	NA	BASELINE	CS	0	M	SKCM	MELANOMA	NIVOLUMAB	PD	PD	1	4.43333
A64	62	1	WT	NA	NA	NA	BASELINE	NS	0	F	SKCM	MELANOMA	PEMBROLIZUMAB	PD	PD	1	3.16667
A65	47	0	MUT	NA	NA	NA	BASELINE	FS	0	F	SKCM	MELANOMA	PEMBROLIZUMAB	CR	RC_RP_SD	0	22.4

## Sheet: Signatures
CD4_activated	CD45	Normal.mucosa	CD8.T.cells	Cytotoxic.cells	DC	Macrophages	Treg	Mast.cells	Th2.cells	Neutrophils	T.helper.cells	NK.cells	Th1.cells	Tcells	Bcells	Cluster1	Cluster2	Cluster3	Cluster4	548 gens	77 gens
IL26	PTPRC	C1R	PRF1	KLRK1	CD1E	CD84	FOXP3	CTSG	BICR5	CSF3R	ATF2	SPN	CTLA4	CD3G	TNFRSF17	AIRE	CCL5	C1QA	CCL1	A2M	AKT3
IL17A		COL3A1	CD8A	GZMH	CD1B	CYBB	LILRA4	TPSAB1		LILRB2	NUP107	XCL2	LTA	CD96	CD19	AMICA1	CCR5	C1QB	CTAGE1	ABCB1	ANP32B
			GZMM	KLRB1	CCL17	CD163		MS4A2				NCR1	IFNG	SH2D1A	MS4A1	BLK	CD8A	C3AR1	CXCR1	ABL1	APOE
			CD8B	KLRD1	CCL22	CD68							CD38	CD6	BLK	BTLA	CD8B	CCR1	IFNA7	ADA	ATM
			FLT3LG	GZMA	CD1A								CCL4	CD3D		CCR6	CXCL10	CD14	IFNL1	ADORA2A	BATF
														LCK		CCR7	CXCL11	CD163	IFNL2	AKT3	BCL2
														CD2		CD19	CXCL9	CD4	IL12B	ALCAM	BCL6
														CD3E		CD2	CXCR6	CD53	IL13	AMICA1	BLK
																CD244	GZMA	CD74	IL19	ANP32B	CCL22
																CD247	GZMB	CD84	IL22	ANXA1	CCR2
																CD27	GZMH	CD86	IL26	APOE	CD160
																CD28	IFNG	CLEC4A	IL3	APP	CD19
																CD37	IRF1	CLEC7A	IL32	ARG2	CD1A
																CD3D	KLRC1	CMKLR1	KIR_Activating_Subgroup_2	ATF1	CD1E
																CD3E	KLRC2	CSF1R	PRM1	ATF2	CD2
																CD3G	LAG3	CTSS	SEMG1	ATG10	CD28
																CD40LG	PDCD1	CYBB	SYCP1	ATG12	CD38
																CD48	PRF1	FCER1G		ATG16L1	CD3E
																CD5	TBX21	HAVCR2		ATG5	CD3G
																CD6	TNFRSF9	HLA.DMA		ATG7	CD6
																CD7		HLA.DMB		ATM	CD68
																CD79A		HLA.DPA1		AXL	CD8A
																CD79B		HLA.DPB1		BATF	CD8B
																CD96		HLA.DRA		BAX	CR2
																CLEC4C		HLA.DRB3		BCL10	CSF3R
																CSF2RB		IL10RA		BCL2	CTLA4
																CXCR3		ITGAM		BCL2L1	CTSG
																CXCR5		ITGAX		BCL6	CXCL5
																FCER2		ITGB2		BID	CXCR6
																FLT3		LAIR2		BIRC5	DOCK9
																FUT7		LCP1		BLK	EBI3
																GZMM		LILRB1		BLNK	EWSR1
																HLA.DOB		LILRB2		BMI1	F13A1
																ICAM3		NCF4		BST1	FEZ1
																ICOS		PDCD1LG2		BST2	FLT3LG
																IL12RB1		PTPRC		BTK	FOXJ1
																IL21R		SELPLG		C1QBP	FOXP3
																IL2RB		SIGLEC1		C1R	GATA3
																IL2RG		TLR1		C1S	GTF3C1
																IL7R		TLR4		C2	GZMM
																INPP5D		TLR7		C3	HLA-DOB
																IRF8		TLR8		C3AR1	HSD11B1
																ITGAL		TNFRSF1B		C5	ICOS
																ITK		TNFSF13B		C7	IDO1
																JAK3				C8G	IL12RB2
																KLRB1				CARD11	IL17RA
																KLRK1				CARD9	IL21R
																LCK				CASP1	IL3RA
																LILRA4				CASP10	KIT
																LTA				CASP3	LAMP3
																LTB				CASP8	LTA
																LY9				CCL2	LTK
																MS4A1				CCL20	MAF
																PAX5				CCL21	MME
																PIK3CG				CCL22	MS4A1
																POU2F2				CCL26	MS4A2
																SELL				CCL28	MSR1
																SH2D1A				CCL3	NEFL
																SLAMF6				CCL5	NFATC4
																SPN				CCND3	NUP107
																STAT4				CCR1	OAS3
																TARP				CCR2	PDCD1
																TIGIT				CCR4	PLA2G6
																TLR10				CCR6	PRF1
																TLR9				CCR7	PRG2
																TNF				CCRL2	REPS1
																TNFRSF13B				CD14	RORC
																ZAP70				CD160	RRAD
																				CD164	SMAD2
																				CD180	SMPD3
																				CD19	STAT4
																				CD1A	STAT6
																				CD1C	SYT17
																				CD1D	THBS1
																				CD1E	TNFRSF17
																				CD2	USP9Y
																				CD200	ZNF205
																				CD207
																				CD22
																				CD24
																				CD247
																				CD27
																				CD274
																				CD276
																				CD28
																				CD33
																				CD34
																				CD36
																				CD37
																				CD38
																				CD3D
																				CD3E
																				CD3EAP
																				CD3G
																				CD4
																				CD40
																				CD44
																				CD46
																				CD47
																				CD48
																				CD5
																				CD53
																				CD55
																				CD58
																				CD59
																				CD6
																				CD63
																				CD68
																				CD7
																				CD70
																				CD74
																				CD79A
																				CD79B
																				CD80
																				CD81
																				CD83
																				CD84
																				CD86
																				CD8A
																				CD8B
																				CD9
																				CD96
																				CD97
																				CD99
																				CDH1
																				CDH5
																				CDK1
																				CDKN1A
																				CEACAM1
																				CEACAM6
																				CEBPB
																				CFB
																				CFD
																				CFI
																				CFP
																				CHUK
																				CKLF
																				CLEC4A
																				CLEC7A
																				CLU
																				CMKLR1
																				COL3A1
																				COLEC12
																				CR1
																				CR2
																				CREB1
																				CREB5
																				CREBBP
																				CSF1
																				CSF1R
																				CSF2RB
																				CSF3R
																				CTAGE1
																				CTCFL
																				CTLA4
																				CTSG
																				CTSH
																				CTSS
																				CTSW
																				CX3CL1
																				CX3CR1
																				CXCL1
																				CXCL10
																				CXCL12
																				CXCL14
																				CXCL16
																				CXCL2
																				CXCL3
																				CXCL5
																				CXCL6
																				CXCR3
																				CXCR4
																				CXCR5
																				CXCR6
																				CYBB
																				CYFIP2
																				CYLD
																				DDX43
																				DDX58
																				DEFB1
																				DMBT1
																				DOCK9
																				DPP4
																				DUSP4
																				DUSP6
																				EBI3
																				ECSIT
																				EGR1
																				EGR2
																				ELK1
																				ENG
																				ENTPD1
																				EOMES
																				EP300
																				EPCAM
																				ETS1
																				EWSR1
																				F12
																				F13A1
																				F2RL1
																				FADD
																				FAS
																				FCER1G
																				FCGR1A
																				FCGR2A
																				FCGR2B
																				FEZ1
																				FLT3LG
																				FN1
																				FOS
																				FOXJ1
																				FOXP3
																				FUT7
																				FYN
																				GATA3
																				GPI
																				GTF3C1
																				GZMM
																				HAMP
																				HAVCR2
																				HCK
																				HMGB1
																				HRAS
																				HSD11B1
																				ICAM1
																				ICAM2
																				ICAM3
																				ICAM4
																				ICOS
																				ICOSLG
																				IDO1
																				IFI16
																				IFI27
																				IFI35
																				IFIH1
																				IFIT1
																				IFIT2
																				IFITM1
																				IFITM2
																				IFNAR1
																				IFNAR2
																				IFNGR1
																				IGF1R
																				IGF2R
																				IKBKB
																				IKBKE
																				IKBKG
																				IL10RA
																				IL11
																				IL11RA
																				IL12A
																				IL12RB1
																				IL12RB2
																				IL13RA1
																				IL13RA2
																				IL15
																				IL15RA
																				IL16
																				IL17RA
																				IL17RB
																				IL18
																				IL18R1
																				IL1A
																				IL1B
																				IL1R1
																				IL1R2
																				IL1RAP
																				IL1RL1
																				IL1RN
																				IL21R
																				IL22RA1
																				IL23A
																				IL24
																				IL2RB
																				IL2RG
																				IL32
																				IL34
																				IL3RA
																				IL4R
																				IL6
																				IL6R
																				IL6ST
																				IL7
																				IL7R
																				IL8
																				ILF3
																				INPP5D
																				IRAK1
																				IRAK2
																				IRAK4
																				IRF1
																				IRF2
																				IRF3
																				IRF4
																				IRF5
																				IRF7
																				IRF8
																				ISG15
																				ISG20
																				ITCH
																				ITGA1
																				ITGA2
																				ITGA2B
																				ITGA4
																				ITGA5
																				ITGA6
																				ITGAE
																				ITGAL
																				ITGAM
																				ITGAX
																				ITGB1
																				ITGB2
																				ITGB3
																				ITGB4
																				ITK
																				JAK1
																				JAK2
																				JAK3
																				JAM3
																				KIT
																				KLRC2
																				KLRG1
																				KLRK1
																				LAG3
																				LAMP1
																				LAMP2
																				LAMP3
																				LCK
																				LCN2
																				LCP1
																				LGALS3
																				LIF
																				LILRA5
																				LILRB1
																				LILRB3
																				LRP1
																				LRRN3
																				LTA
																				LTB
																				LTBR
																				LTF
																				LTK
																				LY86
																				LY9
																				LY96
																				LYN
																				MAF
																				MAP2K1
																				MAP2K2
																				MAP2K4
																				MAP3K1
																				MAP3K5
																				MAP3K7
																				MAP4K2
																				MAPK1
																				MAPK11
																				MAPK14
																				MAPK3
																				MAPK8
																				MAPKAPK2
																				MASP1
																				MASP2
																				MAVS
																				MCAM
																				MEF2C
																				MEFV
																				MERTK
																				MFGE8
																				MICA
																				MICB
																				MIF
																				MME
																				MNX1
																				MR1
																				MRC1
																				MS4A1
																				MS4A2
																				MSR1
																				MST1R
																				MUC1
																				MX1
																				MYD88
																				NCAM1
																				NCF4
																				NEFL
																				NFATC1
																				NFATC2
																				NFATC3
																				NFATC4
																				NFKB1
																				NFKB2
																				NFKBIA
																				NLRC5
																				NLRP3
																				NOD1
																				NOD2
																				NOTCH1
																				NRP1
																				NT5E
																				NUP107
																				OAS3
																				OSM
																				PBK
																				PDCD1
																				PDCD1LG2
																				PDGFC
																				PDGFRB
																				PECAM1
																				PIK3CD
																				PIK3CG
																				PIN1
																				PLA2G6
																				PLAU
																				PLAUR
																				PNMA1
																				POU2AF1
																				POU2F2
																				PPARG
																				PRAME
																				PRF1
																				PRG2
																				PRKCD
																				PRKCE
																				PSEN1
																				PSEN2
																				PSMB10
																				PSMB7
																				PSMB8
																				PSMB9
																				PSMD7
																				PTGS2
																				PTPRC
																				PVR
																				PYCARD
																				RAG1
																				REL
																				RELA
																				RELB
																				REPS1
																				RIPK2
																				RORA
																				RORC
																				RPS6
																				RRAD
																				RUNX1
																				RUNX3
																				S100A8
																				S100B
																				SAA1
																				SBNO2
																				SELL
																				SELPLG
																				SERPING1
																				SH2B2
																				SH2D1A
																				SH2D1B
																				SIGIRR
																				SIGLEC1
																				SLAMF1
																				SLAMF6
																				SLAMF7
																				SLC11A1
																				SMAD2
																				SMAD3
																				SMPD3
																				SOCS1
																				SPA17
																				SPINK5
																				SPN
																				SPP1
																				ST6GAL1
																				STAT1
																				STAT2
																				STAT3
																				STAT4
																				STAT5B
																				STAT6
																				SYK
																				SYT17
																				TAB1
																				TAL1
																				TANK
																				TAP1
																				TAP2
																				TAPBP
																				TBK1
																				TCF7
																				TFE3
																				TFEB
																				TFRC
																				TGFB1
																				TGFB2
																				THBD
																				THBS1
																				THY1
																				TICAM1
																				TICAM2
																				TIRAP
																				TLR1
																				TLR2
																				TLR3
																				TLR4
																				TLR5
																				TLR6
																				TLR7
																				TLR9
																				TNF
																				TNFAIP3
																				TNFRSF10B
																				TNFRSF10C
																				TNFRSF11A
																				TNFRSF11B
																				TNFRSF12A
																				TNFRSF13C
																				TNFRSF14
																				TNFRSF17
																				TNFRSF18
																				TNFRSF1A
																				TNFRSF1B
																				TNFRSF8
																				TNFRSF9
																				TNFSF10
																				TNFSF11
																				TNFSF12
																				TNFSF13
																				TNFSF13B
																				TNFSF14
																				TNFSF15
																				TNFSF4
																				TOLLIP
																				TP53
																				TRAF2
																				TRAF3
																				TRAF6
																				TREM1
																				TTK
																				TXK
																				TXNIP
																				TYK2
																				UBC
																				ULBP2
																				USP9Y
																				VCAM1
																				VEGFA
																				VEGFC
																				YTHDF2
																				ZAP70
																				ZNF205
